# Supplementary material for: Organocatalytic asymmetric [3 + 2] annulation of 1,4-dithiane-2,5-diol with azlactones: access to chiral dihydrothiophen-2(3H)-one derivatives
Source: Royal Society of Chemistry journal article supplement (doi:10.1039/c8qo00305j), 2018-01-01
Supplement: c8qo00305j1.pdf [file c8qo00305j1.pdf]

## *Supporting Information*

### **Organocatalytic Asymmetric [3+2] Annulation of 1, 4-Dithiane-2, 5-diol with Azlactones: Access to Chiral Dihydrothiophen-2(3*H*)-one Derivatives**

Ji-cong Yu,<sup>‡a</sup> Le-mao Yu,<sup>‡a</sup> Xiao-yun, Zhao,<sup>a</sup> Lu Gan,<sup>a</sup> Wei-wei, Zhu,<sup>a</sup> Ze-chen Wang,<sup>c</sup> Rui Wang<sup>b</sup>  
and Xianxing Jiang \*<sup>a</sup>

<sup>a</sup> School of Pharmaceutical Sciences, Sun Yat-Sen University, Guangzhou, 510006, China.

<sup>b</sup> Key Laboratory of Preclinical Study for New Drugs of Gansu Province, School of Basic Medical Sciences, Lanzhou University, 730000, China

<sup>c</sup> School of Pharmaceutical Sciences, Guangdong Pharmaceutical University, Guangzhou, 510006, China

#### **Table of Contents**

|                                                                                                       |    |
|-------------------------------------------------------------------------------------------------------|----|
| 1. General Information.....                                                                           | 2  |
| 2. Synthesis and Characterization.....                                                                | 2  |
| 2.1 General procedure for the synthesis of azlactones.....                                            | 2  |
| 2.2 General procedure for the synthesis of catalyst.....                                              | 6  |
| 3. Tables of the Optimization of Reaction Conditions.....                                             | 9  |
| 4. General Procedure for Asymmetric [3+2] Annulation Reaction.....                                    | 11 |
| 5. X-Ray Crystallographic Data of <b>3a</b> and <b>3a'</b> .....                                      | 20 |
| 6. References.....                                                                                    | 22 |
| 7. <sup>1</sup> H NMR, <sup>13</sup> C NMR, <sup>19</sup> F NMR Spectra and HPLC of All Products..... | 23 |

## 1. General Information

All reactions were performed under oxygen atmosphere using glassware unless otherwise noted, and all reagents were commercially available and used without further purification unless specified otherwise. Organic solutions were concentrated under reduced pressure on a rotary evaporator or an oil pump. Reactions were monitored by thin layer chromatography (TLC), which carried out on GF254 plates. Visualization was performed by fluorescence quenching with UV light at 254 nm, phosphormolybdic acid or KMnO<sub>4</sub> staining solution followed by heating. Flash chromatography was performed with 200-300 mesh silica gels. <sup>1</sup>H NMR spectra were measured on a Bruker 400 (400 MHz) spectrometer and Bruker 500 (500 MHz) spectrometer. Data were reported as follows: chemical shifts in ppm from the residual solvent as an internal standard ( $\delta$  7.26 for CDCl<sub>3</sub>,  $\delta$  2.50 for DMSO and  $\delta$  0.00 for TMS), integration, multiplicity (s = singlet, d = doublet, t = triplet, q = quartet, AB q = AB quartet, m = multiplet, br = broad, and app = apparent), and coupling constants (Hz). <sup>13</sup>C NMR spectra were measured on a Bruker 400 and 500 (101 and 126 MHz) spectrometer with complete proton decoupling. Chemical shifts were reported in ppm from the residual solvent as an internal standard ( $\delta$  77.16 for CDCl<sub>3</sub> and  $\delta$  2.50 for DMSO). HRMS were recorded on a LCMS-IT-TOF. Mass spectra were obtained using electrospray ionization (ESI) mass spectrometer. The ee values determination was carried out using chiral high-performance liquid chromatography (HPLC) with Chiralcel OD-H column.

## 2. Synthesis and Characterization of Compounds

### 2.1 General Procedure for Synthesis of azlactones

The azlactones **2a**<sup>1</sup>, **2d**<sup>2</sup>, **2h**<sup>3</sup>, **2j**<sup>4</sup>, **2l**, **2m**, **2n**, **2p**<sup>5</sup> were prepared according to known procedures. **2b**, **2c**, **2e-2g**, **2i**, **2k**, **2o**, **2q-2t** were afforded as follow procedures.

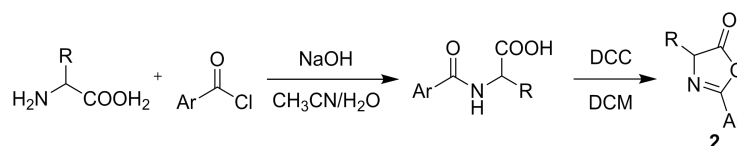

**Step 1:** The corresponding racemic amino acid (1 equiv.) and NaOH (2 equiv.) were dissolved in H<sub>2</sub>O/CH<sub>3</sub>CN (v/v = 3/1). After cooling to 0 °C, the corresponding benzoyl chloride (1.2 equiv.) was added dropwise at this temperature. After the addition was complete, the mixture was allowed to warm to room temperature and was stirred for 3 h. 2M HCl was added to cause precipitation under stirring. The mixture was extracted with ethyl acetate, the organic phase was dried with anhydrous Na<sub>2</sub>SO<sub>4</sub> and concentrated in vacuo to get the *N*-substituted amino acid.

**Step 2:** The corresponding *N*-substituted amino acid (1 equiv.) was suspended in CH<sub>2</sub>Cl<sub>2</sub> (10 mmol/mL), the mixture was cooled to 0 °C and DCC (1.1 equiv.) was added portionwise. After complete addition, the mixture was allowed to warm to room temperature and stirred overnight. After completed, a precipitate was filtered off and the filtrate was concentrated in vacuo. The product was purified by silica gel column chromatography using PE/EA.

### 2-(2-Chlorophenyl)-4-isobutyloxazol-5(4*H*)-one (**2b**)

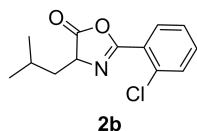

Compound **2b** was prepared according to **step 1, step 2** with 2-chlorobenzoyl chloride as starting material, white solid, 71% yield in total; **<sup>1</sup>H NMR** (400 MHz, CDCl<sub>3</sub>) δ 7.83 (dd, *J* = 7.8, 1.6 Hz, 1H), 7.51 (dd, *J* = 8.0, 1.2 Hz, 1H), 7.48 – 7.43 (m, 1H), 7.37 (td, *J* = 7.6, 1.4 Hz, 1H), 4.46 (dd, *J* = 8.7, 5.8 Hz, 1H), 2.13 – 2.01 (m, 1H), 1.88 (ddd, *J* = 13.4, 7.4, 5.8 Hz, 1H), 1.72 (ddd, *J* = 13.8, 8.7, 6.6 Hz, 1H), 1.03 (dd, *J* = 7.8, 6.7 Hz, 6H); **<sup>13</sup>C NMR** (101 MHz, CDCl<sub>3</sub>) δ 178.49, 159.97, 133.80, 132.75, 131.34, 131.27, 126.86, 125.40, 64.12, 40.61, 25.26, 22.63, 22.20; **HRMS** (ESI) calcd. for C<sub>13</sub>H<sub>15</sub>NO<sub>2</sub>Cl<sup>+</sup> [M+H]<sup>+</sup> 252.0786, found 252.0780.

### 2-(3-Chlorophenyl)-4-isobutyloxazol-5(4H)-one (2c)

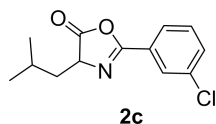

Compound **2c** was prepared according to **step 1, step 2** with 3-chlorobenzoyl chloride as starting material, white solid, 70% yield in total; **<sup>1</sup>H NMR** (400 MHz, CDCl<sub>3</sub>) δ 8.00 (s, 1H), 7.87 (d, *J* = 7.7 Hz, 1H), 7.54 (d, *J* = 8.0 Hz, 1H), 7.42 (t, *J* = 7.9 Hz, 1H), 4.42 (dd, *J* = 9.0, 5.6 Hz, 1H), 2.06 (dp, *J* = 13.6, 6.7 Hz, 1H), 1.89 – 1.80 (m, 1H), 1.72 – 1.62 (m, 1H), 1.03 (dd, *J* = 9.3, 6.7 Hz, 6H); **<sup>13</sup>C NMR** (101 MHz, CDCl<sub>3</sub>) δ 178.46, 160.38, 135.04, 132.71, 130.12, 127.90, 127.78, 125.98, 64.01, 40.74, 25.26, 22.73, 22.01; **HRMS** (ESI) calcd. for C<sub>13</sub>H<sub>15</sub>NO<sub>2</sub>Cl<sup>+</sup> [M+H]<sup>+</sup> 252.0786, found 252.0774.

### 2-(4-Bromophenyl)-4-isobutyloxazol-5(4H)-one (2e)

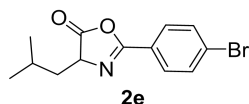

Compound **2e** was prepared according to **step 1, step 2** with 4-bromobenzoyl chloride as starting material, white solid, 77% yield in total; **<sup>1</sup>H NMR** (400 MHz, CDCl<sub>3</sub>) δ 7.88 (d, *J* = 8.6 Hz, 2H), 7.65 (d, *J* = 8.6 Hz, 2H), 4.41 (dd, *J* = 9.0, 5.6 Hz, 1H), 2.14 – 2.01 (m, 1H), 1.86 (ddd, *J* = 13.5, 7.8, 5.6 Hz, 1H), 1.69 (ddd, *J* = 13.8, 9.0, 6.3 Hz, 1H), 1.04 (dd, *J* = 8.5, 6.7 Hz, 6H); **<sup>13</sup>C NMR** (101 MHz, CDCl<sub>3</sub>) δ 178.59, 160.72, 132.15, 129.29, 127.57, 125.01, 64.04, 40.74, 25.26, 22.72, 22.02; **HRMS** (ESI) calcd. for C<sub>13</sub>H<sub>15</sub>NO<sub>2</sub>Br<sup>+</sup> [M+H]<sup>+</sup> 296.0281, found 296.0286.

### 3-(4-Isobutyl-2-(p-tolyl)oxazol-5(4H)-one (2f)

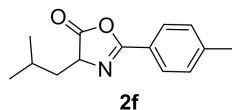

Compound **2f** was prepared according to **step 1, step 2** with 4-bromobenzoyl chloride as starting material, white solid, 62% yield in total; **<sup>1</sup>H NMR** (400 MHz, CDCl<sub>3</sub>) δ 7.90 (d, *J* = 8.2 Hz, 2H), 7.30 (d, *J* = 8.0 Hz, 2H), 4.41 (dd, *J* = 8.8, 5.7 Hz, 1H), 2.45 (s, 3H), 2.16 – 2.01 (m, 1H), 1.86

(ddd,  $J = 13.5, 7.7, 5.7$  Hz, 1H), 1.70 (ddd,  $J = 13.7, 8.8, 6.3$  Hz, 1H), 1.04 (dd,  $J = 8.8, 6.7$  Hz, 6H);  $^{13}\text{C}$  NMR (101 MHz,  $\text{CDCl}_3$ )  $\delta$  179.15, 161.46, 143.32, 129.48, 127.84, 123.30, 63.90, 40.84, 25.22, 22.72, 22.08, 21.66; HRMS (ESI) calcd. for  $\text{C}_{14}\text{H}_{18}\text{NO}_2^+$   $[\text{M}+\text{H}]^+$  232.1332, found 232.1326.

#### 4-Isobutyl-2-(3-methoxyphenyl)oxazol-5(4H)-one (2g)

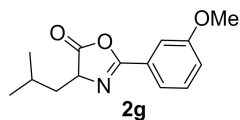

Compound **2g** was prepared according to **step 1**, **step 2** with 3-methoxybenzoyl chloride as starting material, white solid, 74% yield in total;  $^1\text{H}$  NMR (400 MHz,  $\text{CDCl}_3$ )  $\delta$  7.58 (d,  $J = 7.6$  Hz, 1H), 7.51 (d,  $J = 1.3$  Hz, 1H), 7.38 (t,  $J = 8.0$  Hz, 1H), 7.11 (dd,  $J = 8.3, 2.5$  Hz, 1H), 4.41 (dd,  $J = 8.8, 5.8$  Hz, 1H), 3.86 (s, 3H), 2.07 (dp,  $J = 13.5, 6.7$  Hz, 1H), 1.90 – 1.78 (m, 1H), 1.75 – 1.63 (m, 1H), 1.02 (dd,  $J = 9.1, 6.7$  Hz, 6H);  $^{13}\text{C}$  NMR (101 MHz,  $\text{CDCl}_3$ )  $\delta$  178.98, 161.32, 159.81, 129.88, 127.25, 120.39, 119.39, 112.09, 64.00, 55.50, 40.79, 25.19, 22.72, 22.10; HRMS (ESI) calcd. for  $\text{C}_{14}\text{H}_{18}\text{NO}_3^+$   $[\text{M}+\text{H}]^+$  248.1281, found 248.1272.

#### 2-(4-(Tert-butyl)phenyl)-4-isobutyloxazol-5(4H)-one (2i)

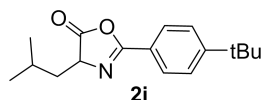

Compound **2i** was prepared according to **step 1**, **step 2** with 4-(tert-butyl)benzoyl chloride as starting material, white solid, 76% yield in total;  $^1\text{H}$  NMR (400 MHz,  $\text{CDCl}_3$ )  $\delta$  7.92 (d,  $J = 8.3$  Hz, 2H), 7.50 (d,  $J = 8.3$  Hz, 2H), 4.40 (dd,  $J = 8.7, 5.8$  Hz, 1H), 2.05 (dp,  $J = 13.4, 6.7$  Hz, 1H), 1.88 – 1.79 (m, 1H), 1.73 – 1.63 (m, 1H), 1.35 (s, 9H), 1.02 (dd,  $J = 10.4, 6.7$  Hz, 6H);  $^{13}\text{C}$  NMR (126 MHz,  $\text{CDCl}_3$ )  $\delta$  179.19, 161.43, 156.40, 127.74, 125.79, 123.18, 63.87, 40.84, 35.14, 31.11, 25.18, 22.76, 22.16; HRMS (ESI) calcd. for  $\text{C}_{17}\text{H}_{24}\text{NO}_2^+$   $[\text{M}+\text{H}]^+$  274.1802, found 274.1792.

#### 2-(3,5-Dimethylphenyl)-4-isobutyloxazol-5(4H)-one (2k)

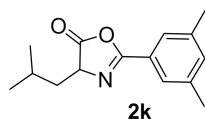

Compound **2k** was prepared according to **step 1**, **step 2** with 3,5-dimethylbenzoyl chloride as starting material, white solid, 77% yield in total;  $^1\text{H}$  NMR (400 MHz,  $\text{CDCl}_3$ )  $\delta$  7.64 (s, 2H), 7.21 (s, 1H), 4.41 (dd,  $J = 8.8, 5.7$  Hz, 1H), 2.39 (s, 6H), 2.14 – 2.02 (m, 1H), 1.90 – 1.81 (m, 1H), 1.74 – 1.65 (m, 1H), 1.04 (dd,  $J = 10.5, 6.7$  Hz, 6H);  $^{13}\text{C}$  NMR (126 MHz,  $\text{CDCl}_3$ )  $\delta$  179.17, 161.77, 138.57, 134.43, 128.31, 125.58, 63.89, 40.83, 25.19, 22.77, 22.08, 21.18; HRMS (ESI) calcd. for  $\text{C}_{15}\text{H}_{20}\text{NO}_2^+$   $[\text{M}+\text{H}]^+$  246.1489, found 246.1487.

#### 4-Isobutyl-2-(naphthalen-1-yl)oxazol-5(4H)-one (2o)

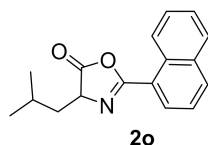

Compound **2o** was prepared according to **step 1, step 2** with 1-naphthoyl chloride as starting material, white solid, 84% yield in total; **<sup>1</sup>H NMR** (400 MHz, CDCl<sub>3</sub>) δ 9.27 (d, *J* = 8.7 Hz, 1H), 8.13 (d, *J* = 7.2 Hz, 1H), 7.99 (d, *J* = 8.2 Hz, 1H), 7.88 (d, *J* = 8.1 Hz, 1H), 7.64 (ddd, *J* = 8.5, 6.9, 1.3 Hz, 1H), 7.57 – 7.52 (m, 1H), 7.49 (t, *J* = 7.8 Hz, 1H), 4.53 (dd, *J* = 9.0, 5.6 Hz, 1H), 2.20 – 2.08 (m, 1H), 1.92 (ddd, *J* = 13.4, 7.6, 5.7 Hz, 1H), 1.75 (ddd, *J* = 13.8, 9.0, 6.5 Hz, 1H), 1.06 (dd, *J* = 9.2, 6.7 Hz, 6H); **<sup>13</sup>C NMR** (101 MHz, CDCl<sub>3</sub>) δ 178.69, 161.19, 133.88, 133.50, 130.84, 130.12, 128.80, 128.16, 126.54, 126.02, 124.67, 121.82, 64.53, 40.95, 25.48, 22.77, 22.19; **HRMS** (ESI) calcd. for C<sub>17</sub>H<sub>18</sub>NO<sub>2</sub><sup>+</sup> [M+H]<sup>+</sup> 268.1332, found 268.1321.

#### 2-(Naphthalen-1-yl)-4-phenethyloxazol-5(4*H*)-one (2q)

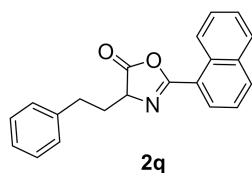

Compound **2q** was prepared according to **step 1, step 2** with 2-amino-4-phenylbutanoic acid and 1-naphthoyl chloride as starting material, white solid, 82% yield in total; **<sup>1</sup>H NMR** (400 MHz, CDCl<sub>3</sub>) δ 9.27 (d, *J* = 8.7 Hz, 1H), 8.14 (dd, *J* = 7.3, 1.1 Hz, 1H), 8.02 (d, *J* = 8.2 Hz, 1H), 7.90 (d, *J* = 8.0 Hz, 1H), 7.66 (ddd, *J* = 8.5, 6.9, 1.3 Hz, 1H), 7.59 – 7.54 (m, 1H), 7.51 (dd, *J* = 8.0, 7.6 Hz, 1H), 7.32 – 7.24 (m, 4H), 7.23 – 7.18 (m, 1H), 4.51 (dd, *J* = 7.6, 5.9 Hz, 1H), 2.93 (t, *J* = 7.7 Hz, 2H), 2.44 – 2.34 (m, 1H), 2.31 – 2.18 (m, 1H); **<sup>13</sup>C NMR** (101 MHz, CDCl<sub>3</sub>) δ 178.07, 161.60, 140.27, 133.89, 133.64, 130.84, 130.23, 128.85, 128.71, 128.61, 128.24, 126.60, 126.42, 126.00, 124.69, 121.70, 65.06, 33.36, 31.67; **HRMS** (ESI) calcd. for C<sub>21</sub>H<sub>18</sub>NO<sub>2</sub><sup>+</sup> [M+H]<sup>+</sup> 316.1332, found 316.1330.

#### 4-(2-(Methylthio)ethyl)-2-(naphthalen-1-yl)oxazol-5(4*H*)-one (2r)

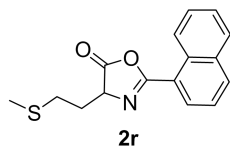

Compound **2r** was prepared according to **step 1, step 2** with 2-amino-4-(methylthio)butanoic acid and 1-naphthoyl chloride as starting material, white solid, 69% yield in total; **<sup>1</sup>H NMR** (500 MHz, CDCl<sub>3</sub>) δ 9.25 (d, *J* = 8.7 Hz, 1H), 8.16 (d, *J* = 7.3 Hz, 1H), 8.04 (d, *J* = 8.2 Hz, 1H), 7.91 (d, *J* = 8.1 Hz, 1H), 7.66 (t, *J* = 7.7 Hz, 1H), 7.57 (t, *J* = 7.5 Hz, 1H), 7.53 (t, *J* = 7.8 Hz, 1H), 4.76 (t, *J* = 6.5 Hz, 1H), 2.81 (t, *J* = 7.0 Hz, 2H), 2.40 (dq, *J* = 13.3, 6.6 Hz, 1H), 2.24 (dq, *J* = 14.3, 7.2 Hz, 1H), 2.14 (s, 3H); **<sup>13</sup>C NMR** (101 MHz, CDCl<sub>3</sub>) δ 178.17, 161.89, 133.85, 133.68, 130.79, 130.26, 128.86, 128.24, 126.60, 125.95, 124.70, 121.67, 64.29, 30.54, 30.26, 15.22; **HRMS** (ESI) calcd. for C<sub>16</sub>H<sub>16</sub>NO<sub>2</sub>S<sup>+</sup> [M+H]<sup>+</sup> 286.0896, found 286.0898.

#### 4-Butyl-2-(naphthalen-1-yl)oxazol-5(4H)-one (2s)

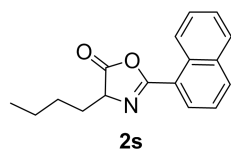

Compound **2s** was prepared according to **step 1**, **step 2** with 2-aminohexanoic acid and 1-naphthoyl chloride as starting material, white solid, 71% yield in total;  $^1\text{H}$  NMR (400 MHz,  $\text{CDCl}_3$ )  $\delta$  9.26 (d,  $J = 8.7$  Hz, 1H), 8.15 (dd,  $J = 7.3, 1.1$  Hz, 1H), 8.03 (d,  $J = 8.2$  Hz, 1H), 7.91 (d,  $J = 8.2$  Hz, 1H), 7.66 (ddd,  $J = 8.5, 6.9, 1.4$  Hz, 1H), 7.60 – 7.50 (m, 2H), 4.56 (dd,  $J = 7.1, 5.6$  Hz, 1H), 2.17 – 2.06 (m, 1H), 2.01 – 1.90 (m, 1H), 1.61 – 1.50 (m, 2H), 1.48 – 1.38 (m, 2H), 0.94 (t,  $J = 7.3$  Hz, 3H);  $^{13}\text{C}$  NMR (101 MHz,  $\text{CDCl}_3$ )  $\delta$  178.30, 161.38, 133.88, 133.50, 130.84, 130.11, 128.80, 128.16, 126.55, 125.99, 124.67, 121.84, 65.98, 31.44, 27.52, 22.35, 13.82; HRMS (ESI) calcd. for  $\text{C}_{17}\text{H}_{18}\text{NO}_2$   $[\text{M}+\text{H}]^+$  268.1332, found 268.1333.

#### 4-Benzyl-2-(naphthalen-1-yl)oxazol-5(4H)-one (2t)

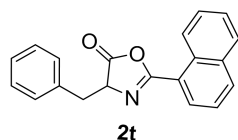

Compound **2t** was prepared according to **step 1**, **step 2** with 2-amino-3-phenylpropanoic acid and 1-naphthoyl chloride as starting material, white solid, 83% yield in total;  $^1\text{H}$  NMR (400 MHz,  $\text{CDCl}_3$ )  $\delta$  9.01 (d,  $J = 8.5$  Hz, 1H), 7.99 (t,  $J = 8.4$  Hz, 2H), 7.89 (d,  $J = 8.0$  Hz, 1H), 7.65 – 7.59 (m, 1H), 7.56 (t,  $J = 7.4$  Hz, 1H), 7.48 (t,  $J = 7.8$  Hz, 1H), 7.33 (d,  $J = 7.2$  Hz, 2H), 7.25 (dt,  $J = 16.4, 7.1$  Hz, 3H), 4.85 (t,  $J = 5.6$  Hz, 1H), 3.47 (dd,  $J = 13.9, 5.0$  Hz, 1H), 3.31 (dd,  $J = 13.9, 6.3$  Hz, 1H);  $^{13}\text{C}$  NMR (101 MHz,  $\text{CDCl}_3$ )  $\delta$  177.38, 161.63, 135.30, 133.75, 133.45, 130.74, 129.97, 129.71, 128.73, 128.50, 128.05, 127.28, 126.54, 125.90, 124.63, 121.82, 67.15, 37.37; HRMS (ESI) calcd. for  $\text{C}_{20}\text{H}_{16}\text{NO}_2$   $[\text{M}+\text{H}]^+$  302.1176, found 302.1174.

### 2.2 General procedure for the synthesis of cinchona alkaloid-derived squaramide catalyst<sup>6</sup>

The Catalysts **C1-C5** and **C9** were commercial available, the **C6-C8**, **C10**, **C11** were afforded as follow procedures.

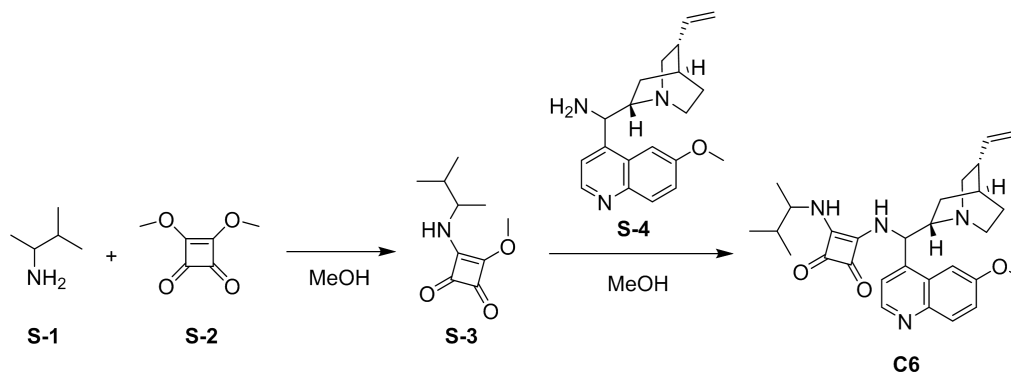

An oven-dried 10 mL of Schlenk tube was charged with 1,2-dimethylpropylamine **S-1** (0.3 mmol) and 3,4-dimethoxycyclobut-3-ene-1,2-dione **S-2** (0.3 mmol), dissolved in 5 mL of MeOH. After stirred for 24 h, the organic solvent was removed under reduced pressure. The obtained residue was purified by flash column chromatography (DCM/MeOH = 30/1) to afford the intermediate **S-3**. Then, the intermediate (0.3 mmol) was dissolved in 5 mL of MeOH with 9-Amino-(9-deoxy)epidihydroquinine **S-4** (0.3 mmol), After stirred for 48 h, the organic solvent was removed under reduced pressure. The obtained residue was purified by flash column chromatography (DCM/MeOH = 30/1) to afford the Cinchona Alkaloid Squaramide catalyst.

**3-(((6-methoxyquinolin-4-yl)((1S,2S,4S,5R)-5-vinylquinuclidin-2-yl)methyl)amino)-4-((3-methylbutan-2-yl)amino)cyclobut-3-ene-1,2-dione (C6)**

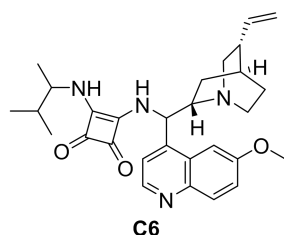

Afforded according to the general procedure as a white solid in 85% yield; **<sup>1</sup>H NMR** (400 MHz, CDCl<sub>3</sub>) δ 8.65 (d, *J* = 3.9 Hz, 1H), 8.04 (d, *J* = 9.2 Hz, 1H), 7.84 (d, *J* = 21.8 Hz, 1H), 7.57 (dd, *J* = 25.8, 4.2 Hz, 1H), 7.42 (dd, *J* = 9.2, 2.2 Hz, 1H), 6.16 (s, 1H), 5.79 (td, *J* = 17.1, 7.6 Hz, 1H), 4.98 (t, *J* = 14.3 Hz, 2H), 4.79 (s, 1H), 3.96 (s, 4H), 3.49 (d, *J* = 51.5 Hz, 2H), 3.26 – 3.10 (m, 1H), 2.97 (s, 2H), 2.83 – 2.66 (m, 2H), 2.29 (s, 1H), 1.72 – 1.39 (m, 5H), 1.01 (s, 3H), 0.75 (d, *J* = 6.3 Hz, 6H); **<sup>13</sup>C NMR** (126 MHz, CDCl<sub>3</sub>) δ 182.68, 167.34, 158.67, 147.66, 144.69, 141.23, 141.09, 131.72, 122.40, 114.82, 114.77, 101.46, 55.97, 55.95, 55.79, 40.68, 39.40, 39.30, 33.98, 27.71, 27.65, 27.53, 27.48, 26.02, 18.71, 18.57, 18.35, 18.27, 18.14; **HRMS** (ESI) calcd. for C<sub>29</sub>H<sub>37</sub>N<sub>4</sub>O<sub>3</sub><sup>+</sup> [M+H]<sup>+</sup> 489.2860, found 489.2838.

**3-((3,3-dimethylbutan-2-yl)amino)-4-(((6-methoxyquinolin-4-yl)((1S,2S,4S,5R)-5-vinylquinuclidin-2-yl)methyl)amino)cyclobut-3-ene-1,2-dione (C7)**

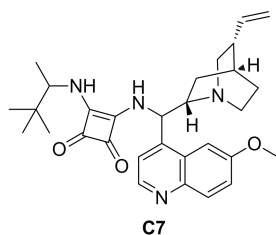

Afforded according to the general procedure as a white solid in 77% yield; **<sup>1</sup>H NMR** (400 MHz, DMSO) δ 8.80 (d, *J* = 4.5 Hz, 1H), 7.97 (d, *J* = 9.2 Hz, 1H), 7.80 (d, *J* = 15.4 Hz, 2H), 7.61 (d, *J* = 4.2 Hz, 1H), 7.44 (dd, *J* = 9.2, 2.4 Hz, 1H), 7.22 (s, 1H), 6.03 – 5.89 (m, 2H), 5.00 (dd, *J* = 21.3, 13.8 Hz, 2H), 3.94 (s, 3H), 3.88 – 3.81 (m, 1H), 3.24 – 3.15 (m, 1H), 2.75 – 2.61 (m, 2H), 2.27 (s, 1H), 1.53 (d, *J* = 21.9 Hz, 4H), 1.01 (d, *J* = 6.6 Hz, 3H), 0.86 (s, 9H), 0.59 (s, 1H); **<sup>13</sup>C NMR** (101 MHz, DMSO) δ 182.58, 182.13, 168.04, 166.89, 158.33, 148.25, 144.78, 142.62, 131.94, 127.96, 122.41, 120.05, 114.78, 102.04, 59.23, 58.25, 56.17, 34.84, 31.41, 27.79, 26.70, 26.15, 17.15; **HRMS** (ESI) calcd. for C<sub>30</sub>H<sub>38</sub>N<sub>4</sub>O<sub>3</sub><sup>+</sup> [M+H]<sup>+</sup> 503.3017, found 503.3005.

**3-(isopropylamino)-4-(((6-methoxyquinolin-4-yl)((1S,2S,4S,5R)-5-vinylquinuclidin-2-yl)methyl)amino)cyclobut-3-ene-1,2-dione (C8)**

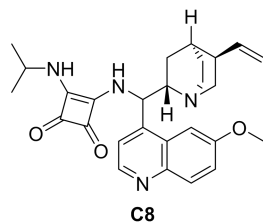

Afforded according to the general procedure as a white solid in 84% yield; **<sup>1</sup>H NMR** (400 MHz, CDCl<sub>3</sub>) δ 8.69 (d, *J* = 4.6 Hz, 1H), 8.03 (d, *J* = 9.2 Hz, 1H), 7.88 (s, 1H), 7.70 (d, *J* = 4.3 Hz, 1H), 7.42 (dd, *J* = 9.2, 2.4 Hz, 1H), 6.30 (s, 1H), 5.85 (ddd, *J* = 17.4, 10.1, 7.5 Hz, 1H), 5.18 – 4.91 (m, 2H), 4.11 (dd, *J* = 13.0, 6.4 Hz, 1H), 3.99 (s, 3H), 3.91 (s, 1H), 3.71 (dt, *J* = 21.8, 10.9 Hz, 2H), 3.39 – 3.27 (m, 1H), 3.00 (d, *J* = 10.4 Hz, 1H), 2.88 (s, 1H), 2.42 (s, 1H), 1.74 (d, *J* = 12.8 Hz, 3H), 1.59 (s, 1H), 1.06 (dd, *J* = 24.6, 5.8 Hz, 5H), 0.84 (d, *J* = 7.3 Hz, 1H); **<sup>13</sup>C NMR** (101 MHz, CDCl<sub>3</sub>) δ 182.51, 181.57, 167.16, 167.00, 158.75, 147.74, 144.65, 140.27, 131.66, 122.35, 115.47, 101.50, 58.28, 56.07, 55.57, 46.63, 40.95, 38.89, 27.39, 27.07, 25.76, 23.88, 23.65, 20.06, 18.43; **HRMS** (ESI) calcd. for C<sub>27</sub>H<sub>32</sub>N<sub>4</sub>O<sub>3</sub><sup>+</sup> [M+H]<sup>+</sup> 461.2547, found 461.2539.

**3-((4-(tert-butyl)phenyl)amino)-4-(((6-methoxyquinolin-4-yl)((1S,2S,4S,5R)-5-vinylquinuclidin-2-yl)methyl)amino)cyclobut-3-ene-1,2-dione (C10)**

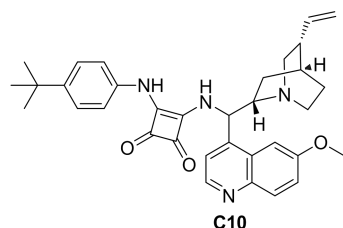

Afforded according to the general procedure as a white solid in 73% yield; **<sup>1</sup>H NMR** (400 MHz, DMSO) δ 8.83 (d, *J* = 4.4 Hz, 1H), 8.00 (d, *J* = 9.2 Hz, 1H), 7.78 (s, 1H), 7.69 (d, *J* = 4.5 Hz, 1H), 7.48 – 7.42 (m, 2H), 7.39 (d, *J* = 8.8 Hz, 1H), 7.31 (s, 4H), 6.10 – 5.92 (m, 2H), 5.04 (dd, *J* = 22.3, 13.8 Hz, 2H), 3.95 (s, 3H), 2.75 (s, 2H), 2.34 (s, 1H), 1.60 (d, *J* = 20.1 Hz, 7H), 1.27 (s, 7H), 1.23 (s, 9H); **<sup>13</sup>C NMR** (101 MHz, DMSO) δ 184.07, 181.81, 180.23, 168.20, 165.91, 158.41, 148.28, 146.15, 145.76, 144.80, 136.57, 132.04, 127.86, 126.50, 126.44, 122.48, 118.71, 118.40, 101.89, 59.36, 56.18, 34.51, 34.44, 31.63, 31.60, 27.67; **HRMS** (ESI) calcd. for C<sub>34</sub>H<sub>38</sub>N<sub>4</sub>O<sub>3</sub><sup>+</sup> [M+H]<sup>+</sup> 551.3017, found 551.3002.

**3-(((1R,4aS,10aR)-7-isopropyl-1,4a-dimethyl-1,2,3,4,4a,9,10,10a-octahydrophenanthren-1-yl)methyl)amino)-4-((quinolin-4-yl)((1S,2S,4S,5R)-5-vinylquinuclidin-2-yl)methyl)amino)cyclobut-3-ene-1,2-dione (C11)**



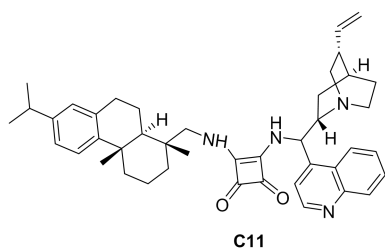

Afforded according to the general procedure as a white solid in 84% yield;  $^1\text{H}$  NMR (400 MHz, DMSO)  $\delta$  8.93 (dd,  $J$  = 21.1, 3.7 Hz, 1H), 8.42 (t,  $J$  = 8.0 Hz, 1H), 8.06 (t,  $J$  = 8.1 Hz, 1H), 8.01 – 7.74 (m, 3H), 7.66 (dd,  $J$  = 21.3, 14.3 Hz, 2H), 7.45 – 7.32 (m, 1H), 7.09 (d,  $J$  = 7.7 Hz, 1H), 6.90 (d,  $J$  = 7.8 Hz, 1H), 6.72 (s, 1H), 6.06 (s, 1H), 5.90 – 5.77 (m, 1H), 5.17 (d,  $J$  = 17.1 Hz, 1H), 5.08 (d,  $J$  = 10.0 Hz, 1H), 3.54 (s, 1H), 3.15 (s, 1H), 2.89 (s, 3H), 2.72 (dd,  $J$  = 15.0, 5.8 Hz, 2H), 2.22 (d,  $J$  = 11.0 Hz, 1H), 1.75 (s, 1H), 1.56 (s, 6H), 1.33 – 1.20 (m, 4H), 1.12 (d,  $J$  = 7.0 Hz, 9H), 0.91 (s, 2H), 0.83 (d,  $J$  = 8.6 Hz, 5H), 0.77 (s, 1H);  $^{13}\text{C}$  NMR (101 MHz, DMSO)  $\delta$  182.80, 182.48, 168.54, 167.44, 150.82, 148.59, 147.16, 145.36, 140.94, 137.91, 134.60, 130.41, 129.87, 127.52, 126.83, 125.60, 124.53, 124.00, 123.72, 119.68, 115.09, 59.65, 56.10, 54.33, 49.43, 46.31, 45.01, 39.08, 38.32, 37.62, 37.41, 35.50, 33.33, 30.12, 27.73, 26.41, 25.56, 24.35, 20.14, 19.81, 18.47, 12.27; HRMS (ESI) calcd. for  $\text{C}_{43}\text{H}_{52}\text{N}_4\text{O}_2^+$   $[\text{M}+\text{H}]^+$  657.4163, found 657.4162.

### 3. Table of the Optimization of Reaction Conditions<sup>a</sup>

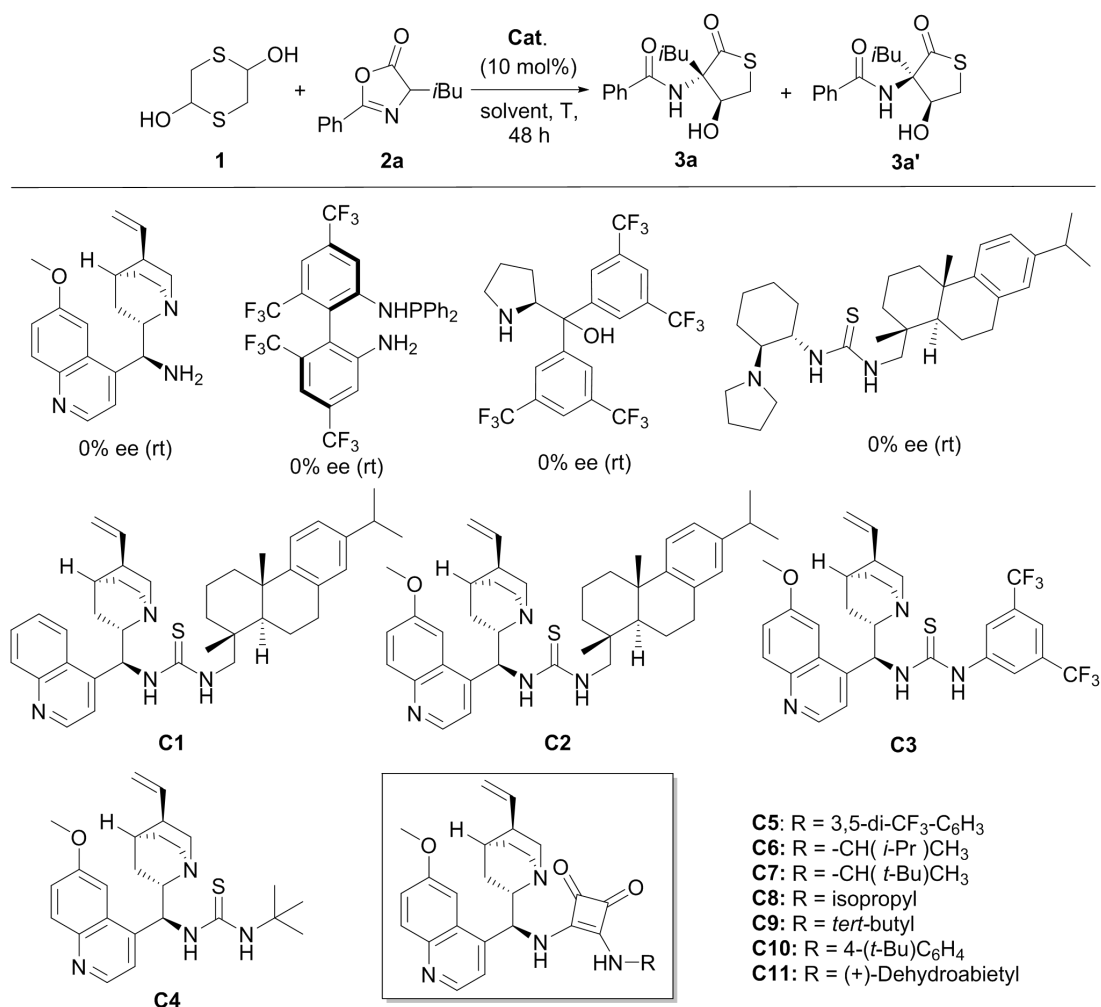

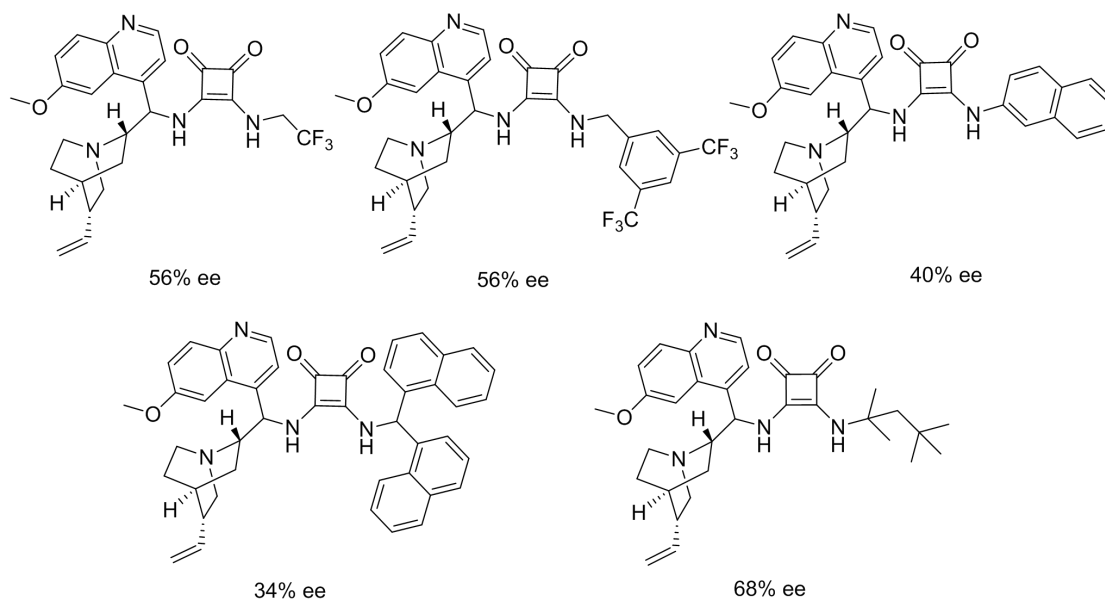

| entry          | Cat.              | solvent                | Temp.(°C) | Conv.(%) <sup>b</sup> | ee(%) <sup>c</sup> |
|----------------|-------------------|------------------------|-----------|-----------------------|--------------------|
| 1 <sup>d</sup> | Et <sub>3</sub> N | MTBE                   | rt        | 99                    | 0                  |
| 2              | <b>C1</b>         | MTBE                   | rt        | 20                    | 25                 |
| 3              | <b>C1</b>         | MTBE                   | 60        | 73                    | 34                 |
| 4              | <b>C2</b>         | MTBE                   | 60        | 80                    | 52                 |
| 5              | <b>C3</b>         | MTBE                   | 60        | 91                    | 23                 |
| 6              | <b>C4</b>         | MTBE                   | 60        | 98                    | 56                 |
| 7              | <b>C5</b>         | MTBE                   | 60        | 90                    | 50                 |
| 8              | <b>C6</b>         | MTBE                   | 60        | 91                    | 63                 |
| 9              | <b>C7</b>         | MTBE                   | 60        | 90                    | 62                 |
| 10             | <b>C8</b>         | MTBE                   | 60        | 89                    | 64                 |
| 11             | <b>C9</b>         | MTBE                   | 60        | 94                    | 66                 |
| 12             | <b>C10</b>        | MTBE                   | 60        | 90                    | 40                 |
| 13             | <b>C11</b>        | MTBE                   | 60        | 89                    | 58                 |
| 14             | <b>C9</b>         | THF                    | 60        | 98                    | 30                 |
| 15             | <b>C9</b>         | EA                     | 60        | 67                    | 55                 |
| 16             | <b>C9</b>         | Toluene                | 60        | 86                    | 66                 |
| 17             | <b>C9</b>         | DCM                    | 60        | 89                    | 69                 |
| <b>18</b>      | <b>C9</b>         | <b>CCl<sub>4</sub></b> | <b>60</b> | <b>90</b>             | <b>73</b>          |
| 19             | <b>C9</b>         | CCl <sub>4</sub>       | rt        | trace                 | 69                 |
| 20             | <b>C9</b>         | CCl <sub>4</sub>       | 80        | 76                    | 64                 |
| 21             | <b>C9</b>         | CCl <sub>4</sub>       | 60        | 89                    | 67                 |

<sup>a</sup>Unless otherwise stated, all reactions were conducted on a 0.2 mmol scale with **1** (1.1 equiv), **2a** (1.0 equiv), and catalyst (0.1 equiv) in solvent (2.0 mL) at tested temperature for 48 h, and 3:1 dr values were detected by <sup>1</sup>H NMR.

<sup>b</sup>Determined by <sup>1</sup>H NMR (400 MHz) analysis of the crude reaction mixture based on **2a**. <sup>c</sup>the ee values were determined by HPLC. <sup>d</sup>2 h was detected.

#### 4. General Procedure for Asymmetric [3+2] Annulation Reaction

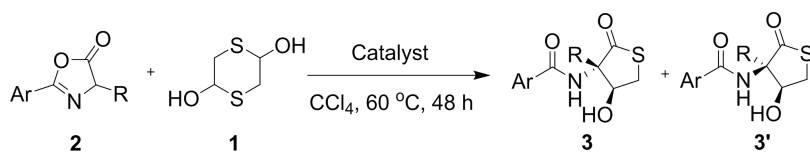

An oven-dried 10 mL of Schlenk tube was charged with Azlactone **2** (0.2 mmol), 1,4-dithiane-2,5-diol **1** (0.2 mmol) and cinchona alkaloid-derived catalyst, dissolved in  $\text{CCl}_4$  (2 mL), After stirred at 60 °C for 48 h, the organic solvent was removed under reduced pressure, The obtained residue was purified by flash column chromatography to afford the product **3** (PE/EA = 8/1) and **3'** (PE/EA = 2/1).

##### *N*-(4-hydroxy-3-isobutyl-2-oxotetrahydrothiophen-3-yl)benzamide (**3a**)

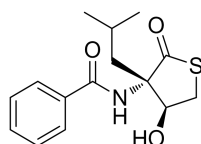

Afforded according to the general procedure as a white solid in 90% yield; m.p. = 94.6-96.0 °C;  $[\alpha]^{20}_{\text{D}} = -10.22$  ( $c = 1.0$ ,  $\text{CH}_2\text{Cl}_2$ ); **<sup>1</sup>H NMR** (400 MHz,  $\text{CDCl}_3$ )  $\delta$  7.80 (dd,  $J = 5.2, 3.4$  Hz, 2H), 7.60 – 7.54 (m, 1H), 7.48 (dd,  $J = 10.4, 4.7$  Hz, 2H), 7.17 (s, 1H), 6.58 (s, 1H), 4.55 (dd,  $J = 9.9, 7.2$  Hz, 1H), 3.45 (dd,  $J = 11.2, 7.1$  Hz, 1H), 3.25 (dd,  $J = 11.1, 10.0$  Hz, 1H), 2.31 (dd,  $J = 14.9, 6.4$  Hz, 1H), 1.82 – 1.72 (m, 1H), 1.68 (dd,  $J = 14.9, 5.4$  Hz, 1H), 0.93 (d,  $J = 2.4$  Hz, 3H), 0.91 (d,  $J = 2.4$  Hz, 3H); **<sup>13</sup>C NMR** (101 MHz,  $\text{CDCl}_3$ )  $\delta$  205.05, 168.64, 133.09, 132.48, 128.92, 127.08, 77.27, 71.67, 35.58, 32.18, 24.48, 24.25, 23.20; **HRMS** (ESI) calcd. for  $\text{C}_{15}\text{H}_{19}\text{NO}_3\text{S}^+$   $[\text{M}+\text{H}]^+$  294.1158, found 294.1145; **HPLC**: The ee value was 71%,  $t_{\text{R}}$  (minor) = 8.093 min,  $t_{\text{R}}$  (major) = 5.510 min (Chiralcel OD-H,  $n$ -hexane/ $i$ -PrOH = 90:10, flow rate = 1 mL/min, UV = 254 nm).

##### 2-Chloro-*N*-(4-hydroxy-3-isobutyl-2-oxotetrahydrothiophen-3-yl)benzamide (**3b**)

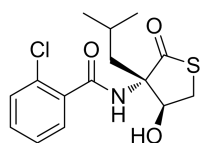

Afforded according to the general procedure as a white solid in 78% yield; m.p. = 94.2-95.6 °C;  $[\alpha]^{20}_{\text{D}} = -8.31$  ( $c = 1.0$ ,  $\text{CH}_2\text{Cl}_2$ ); **<sup>1</sup>H NMR** (400 MHz,  $\text{CDCl}_3$ )  $\delta$  7.67 (dd,  $J = 7.6, 1.2$  Hz, 1H), 7.48 – 7.41 (m, 2H), 7.40 – 7.34 (m, 2H), 6.28 (s, 1H), 4.61 (dd,  $J = 9.7, 7.3$  Hz, 1H), 3.47 (dd,  $J = 11.3, 7.1$  Hz, 1H), 3.33 – 3.24 (m, 1H), 2.35 (dd,  $J = 15.1, 5.4$  Hz, 1H), 1.89 – 1.78 (m, 1H), 1.69 (dd,  $J = 15.0, 6.1$  Hz, 1H), 0.99 (d,  $J = 6.7$  Hz, 3H), 0.94 (d,  $J = 6.6$  Hz, 3H); **<sup>13</sup>C NMR** (101 MHz,  $\text{CDCl}_3$ )  $\delta$  204.46, 167.86, 133.65, 132.08, 130.94, 130.62, 129.88, 127.25, 77.11, 72.30, 36.00, 32.17, 24.59, 24.33, 22.97; **HRMS** (ESI) calcd. for  $\text{C}_{15}\text{H}_{19}\text{NO}_3\text{SCl}^+$   $[\text{M}+\text{H}]^+$  328.0769, found 328.0792; **HPLC**: The ee value was 76%,  $t_{\text{R}}$  (minor) = 9.747 min,  $t_{\text{R}}$  (major) = 6.650 min (Chiralcel OD-H,  $n$ -hexane/ $i$ -PrOH = 90:10, flow rate = 1 mL/min, UV = 254 nm).

### 3-Chloro-*N*-(4-hydroxy-3-isobutyl-2-oxotetrahydrothiophen-3-yl)benzamide (3c)

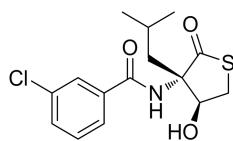

Afforded according to the general procedure as a white solid in 81% yield; m.p. = 95.0-95.7 °C;  $[\alpha]^{20}_D = -14.22$  ( $c = 1.0$ ,  $\text{CH}_2\text{Cl}_2$ );  **$^1\text{H NMR}$**  (400 MHz,  $\text{CDCl}_3$ )  $\delta$  7.80 (s, 1H), 7.65 (d,  $J = 7.7$  Hz, 1H), 7.56–7.49 (m, 1H), 7.41 (t,  $J = 7.9$  Hz, 1H), 7.15 (s, 1H), 6.35 (s, 1H), 4.54 (dd,  $J = 9.8$ , 7.3 Hz, 1H), 3.44 (dd,  $J = 11.2$ , 7.1 Hz, 1H), 3.25 (t,  $J = 10.6$  Hz, 1H), 2.28 (dd,  $J = 14.9$ , 6.2 Hz, 1H), 1.81 – 1.68 (m, 1H), 1.68 (dd,  $J = 14.9$ , 5.3 Hz, 1H), 0.92 (dd,  $J = 6.5$ , 3.0 Hz, 6H);  **$^{13}\text{C NMR}$**  (101 MHz,  $\text{CDCl}_3$ )  $\delta$  204.90, 167.25, 135.24, 134.89, 132.50, 130.18, 127.57, 124.96, 77.18, 71.78, 35.65, 32.16, 24.44, 24.26, 23.16; **HRMS** (ESI) calcd. for  $\text{C}_{15}\text{H}_{19}\text{NO}_3\text{SCl}^+$   $[\text{M}+\text{H}]^+$  328.0769, found 328.0754; **HPLC**: The ee value was 61%,  $t_R$  (minor) = 6.737 min,  $t_R$  (major) = 5.930 min (Chiralcel OD-H,  $n$ -hexane/ $i$ -PrOH = 90:10, flow rate = 1 mL/min, UV = 254 nm).

### 4-Chloro-*N*-(4-hydroxy-3-isobutyl-2-oxotetrahydrothiophen-3-yl)benzamide (3d)

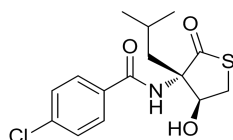

Afforded according to the general procedure as a white solid in 87% yield; m.p. = 90.5-91.5 °C;  $[\alpha]^{20}_D = -2.62$  ( $c = 1.0$ ,  $\text{CH}_2\text{Cl}_2$ );  **$^1\text{H NMR}$**  (500 MHz,  $\text{CDCl}_3$ )  $\delta$  7.76 (d,  $J = 8.5$  Hz, 2H), 7.47 (d,  $J = 8.5$  Hz, 2H), 7.13 (s, 1H), 6.45 (s, 1H), 4.55 (dd,  $J = 9.8$ , 7.2 Hz, 1H), 3.46 (dd,  $J = 11.2$ , 7.1 Hz, 1H), 3.27 (t,  $J = 10.6$  Hz, 1H), 2.30 (dd,  $J = 14.9$ , 6.4 Hz, 1H), 1.80–1.72 (m, 1H), 1.69 (dd,  $J = 15.1$ , 5.4 Hz, 1H), 0.93 (dd,  $J = 8.5$ , 6.7 Hz, 6H);  **$^{13}\text{C NMR}$**  (101 MHz,  $\text{CDCl}_3$ )  $\delta$  204.95, 167.50, 138.88, 131.47, 129.19, 128.52, 77.19, 71.73, 35.60, 32.16, 24.45, 24.21, 23.18; **HRMS** (ESI) calcd. for  $\text{C}_{15}\text{H}_{19}\text{NO}_3\text{SCl}^+$   $[\text{M}+\text{H}]^+$  328.0769, found 328.0758; **HPLC**: The ee value was 56%,  $t_R$  (minor) = 8.523 min,  $t_R$  (major) = 7.823 min (Chiralcel OD-H,  $n$ -hexane/ $i$ -PrOH = 90:10, flow rate = 1 mL/min, UV = 254 nm).

### 4-Bromo-*N*-(4-hydroxy-3-isobutyl-2-oxotetrahydrothiophen-3-yl)benzamide (3e)

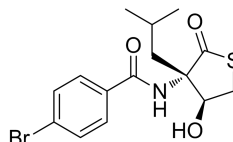

Afforded according to the general procedure as a white solid in 83% yield; m.p. = 108.0-109.8 °C;  $[\alpha]^{20}_D = -7.20$  ( $c = 1.0$ ,  $\text{CH}_2\text{Cl}_2$ );  **$^1\text{H NMR}$**  (400 MHz,  $\text{CDCl}_3$ )  $\delta$  7.67 (d,  $J = 8.4$  Hz, 2H), 7.62 (d,  $J = 8.6$  Hz, 2H), 7.11 (s, 1H), 6.41 (s, 1H), 4.53 (dd,  $J = 9.7$ , 7.3 Hz, 1H), 3.45 (dd,  $J = 11.2$ , 7.2 Hz, 1H), 3.25 (t,  $J = 10.6$  Hz, 1H), 2.28 (dd,  $J = 14.8$ , 6.2 Hz, 1H), 1.79 – 1.71 (m, 1H), 1.67 (dd,  $J = 15.0$ , 5.3 Hz, 1H), 0.91 (t,  $J = 6.9$  Hz, 6H);  **$^{13}\text{C NMR}$**  (101 MHz,  $\text{CDCl}_3$ )  $\delta$  204.97, 167.61, 132.19, 131.91, 128.66, 127.39, 77.18, 71.74, 35.57, 32.18, 24.48, 24.22, 23.19; **HRMS** (ESI) calcd. for  $\text{C}_{15}\text{H}_{18}\text{NO}_3\text{SBrNa}^+$   $[\text{M}+\text{Na}]^+$  394.0083, found 394.0075; **HPLC**: The ee value was 70%,

$t_R$  (minor) = 22.117 min,  $t_R$  (major) = 20.850 min (Chiralcel OD-H, *n*-hexane/*i*-PrOH = 95:5, flow rate = 0.5 mL/min, UV = 254 nm).

***N*-(4-hydroxy-3-isobutyl-2-oxotetrahydrothiophen-3-yl)-4-methylbenzamide (3f)**

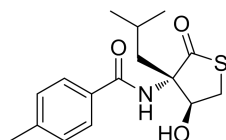

Afforded according to the general procedure as a white solid in 94% yield; m.p. = 102.0-103.5 °C;  $[\alpha]_D^{20} = -15.76$  ( $c = 1.0$ ,  $\text{CH}_2\text{Cl}_2$ );  $^1\text{H NMR}$  (400 MHz,  $\text{CDCl}_3$ )  $\delta$  7.69 (d,  $J = 8.1$  Hz, 2H), 7.27 (d,  $J = 7.9$  Hz, 2H), 7.13 (s, 1H), 6.65 (s, 1H), 4.54 (dd,  $J = 9.8, 7.2$  Hz, 1H), 3.44 (dd,  $J = 11.2, 7.1$  Hz, 1H), 3.25 (t,  $J = 10.6$  Hz, 1H), 2.42 (s, 3H), 2.31 (dd,  $J = 14.9, 6.4$  Hz, 1H), 1.80 – 1.70 (m, 1H), 1.66 (dd,  $J = 14.9, 5.3$  Hz, 1H), 0.97 – 0.85 (m, 6H);  $^{13}\text{C NMR}$  (101 MHz,  $\text{CDCl}_3$ )  $\delta$  205.13, 168.58, 143.15, 130.20, 129.56, 127.10, 77.29, 71.60, 35.53, 32.18, 24.49, 24.22, 23.18, 21.53; **HRMS** (ESI) calcd. for  $\text{C}_{16}\text{H}_{22}\text{NO}_3\text{S}^+$   $[\text{M}+\text{H}]^+$  308.1315, found 308.1319; **HPLC**: The ee value was 68%,  $t_R$  (minor) = 9.443 min,  $t_R$  (major) = 7.393 min (Chiralcel OD-H, *n*-hexane/*i*-PrOH = 90:10, flow rate = 1 mL/min, UV = 254 nm).

***N*-(4-hydroxy-3-isobutyl-2-oxotetrahydrothiophen-3-yl)-3-methoxybenzamide (3g)**

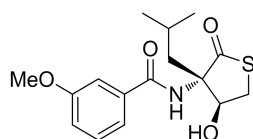

Afforded according to the general procedure as a white oil in 92% yield;  $[\alpha]_D^{20} = -19.58$  ( $c = 1.0$ ,  $\text{CH}_2\text{Cl}_2$ );  $^1\text{H NMR}$  (400 MHz,  $\text{CDCl}_3$ )  $\delta$  7.37 (dd,  $J = 10.8, 4.8$  Hz, 2H), 7.31 (d,  $J = 7.2$  Hz, 1H), 7.15 (s, 1H), 7.09 (dd,  $J = 8.1, 2.4$  Hz, 1H), 6.53 (s, 1H), 4.54 (dd,  $J = 9.8, 7.2$  Hz, 1H), 3.86 (s, 3H), 3.44 (dd,  $J = 11.2, 7.1$  Hz, 1H), 3.25 (t,  $J = 10.6$  Hz, 1H), 2.30 (dd,  $J = 14.9, 6.3$  Hz, 1H), 1.81–1.71 (m, 1H), 1.67 (dd,  $J = 14.9, 5.3$  Hz, 1H), 0.92 (d,  $J = 6.5$  Hz, 6H);  $^{13}\text{C NMR}$  (101 MHz,  $\text{CDCl}_3$ )  $\delta$  204.92, 168.49, 160.04, 134.55, 129.91, 118.80, 118.57, 112.49, 77.23, 71.66, 55.49, 35.60, 32.15, 24.46, 24.24, 23.18; **HRMS** (ESI) calcd. for  $\text{C}_{16}\text{H}_{22}\text{NO}_4\text{S}^+$   $[\text{M}+\text{H}]^+$  324.1264, found 324.1258; **HPLC**: The ee value was 72%,  $t_R$  (minor) = 7.590 min,  $t_R$  (major) = 6.540 min (Chiralcel OD-H, *n*-hexane/*i*-PrOH = 90:10, flow rate = 1 mL/min, UV = 254 nm).

***N*-(4-hydroxy-3-isobutyl-2-oxotetrahydrothiophen-3-yl)-4-methoxybenzamide (3h)**

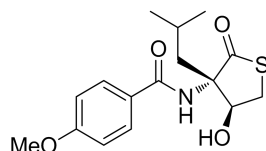

Afforded according to the general procedure as a white solid in 91% yield; m.p. = 118.2-119.5 °C;  $[\alpha]_D^{20} = -12.71$  ( $c = 1.0$ ,  $\text{CH}_2\text{Cl}_2$ );  $^1\text{H NMR}$  (400 MHz,  $\text{CDCl}_3$ )  $\delta$  7.78 (d,  $J = 8.7$  Hz, 2H), 7.08 (s, 1H), 6.97 (d,  $J = 8.7$  Hz, 2H), 6.69 (s, 1H), 4.54 (dd,  $J = 9.7, 7.3$  Hz, 1H), 3.88 (s, 3H), 3.45 (dd,  $J = 11.2, 7.1$  Hz, 1H), 3.25 (t,  $J = 10.6$  Hz, 1H), 2.32 (dd,  $J = 14.9, 6.4$  Hz, 1H), 1.83 – 1.62 (m, 2H), 0.96 – 0.89 (m, 6H);  $^{13}\text{C NMR}$  (101 MHz,  $\text{CDCl}_3$ )  $\delta$  205.18, 168.10, 162.97, 129.01, 125.22,

114.09, 71.56, 55.49, 35.55, 32.17, 24.47, 24.20, 23.19; **HRMS** (ESI) calcd. for  $C_{16}H_{22}NO_4S^+$   $[M+H]^+$  324.1264, found 324.1267; **HPLC**: The ee value was 72%,  $t_R$  (minor) = 9.590 min,  $t_R$  (major) = 7.957 min (Chiralcel OD-H, *n*-hexane/*i*-PrOH = 90:10, flow rate = 1 mL/min, UV = 254 nm).

**4-(Tert-butyl)-*N*-(4-hydroxy-3-isobutyl-2-oxotetrahydrothiophen-3-yl)benzamide (3i)**

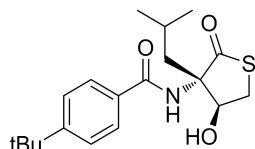

Afforded according to the general procedure as a white solid in 85% yield; m.p. = 84.5-85.0 °C;  $[\alpha]^{20}_D = -13.12$  ( $c = 1.0$ ,  $CH_2Cl_2$ );  $^1H$  NMR (400 MHz,  $CDCl_3$ )  $\delta$  7.74 (d,  $J = 8.1$  Hz, 2H), 7.49 (d,  $J = 8.0$  Hz, 2H), 7.14 (s, 1H), 6.65 (s, 1H), 4.53 (dd,  $J = 9.7, 7.3$  Hz, 1H), 3.44 (dd,  $J = 11.1, 7.1$  Hz, 1H), 3.26 (d,  $J = 10.3$  Hz, 1H), 2.32 (dd,  $J = 14.9, 6.3$  Hz, 1H), 1.80 – 1.71 (m, 1H), 1.66 (dd,  $J = 15.9, 6.3$  Hz, 2H), 1.34 (s, 9H), 0.92 (d,  $J = 6.6$  Hz, 6H);  $^{13}C$  NMR (101 MHz,  $CDCl_3$ )  $\delta$  205.12, 168.58, 156.19, 130.17, 126.97, 125.86, 71.60, 35.57, 35.06, 32.17, 31.11, 24.46, 24.28, 23.20; **HRMS** (ESI) calcd. for  $C_{19}H_{27}NO_3SNa^+$   $[M+Na]^+$  372.1604, found 372.1594; **HPLC**: The ee value was 75%,  $t_R$  (minor) = 15.347 min,  $t_R$  (major) = 14.200 min (Chiralcel OD-H, *n*-hexane/*i*-PrOH = 95:5, flow rate = 1 mL/min, UV = 254 nm).

***N*-(4-hydroxy-3-isobutyl-2-oxotetrahydrothiophen-3-yl)-4-(trifluoromethyl)benzamide (3j)**

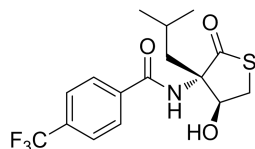

Afforded according to the general procedure as a white solid in 88% yield; m.p. = 76.0-78.0 °C;  $[\alpha]^{20}_D = -5.25$  ( $c = 1.0$ ,  $CH_2Cl_2$ );  $^1H$  NMR (400 MHz,  $CDCl_3$ )  $\delta$  7.93 (d,  $J = 8.2$  Hz, 2H), 7.77 (d,  $J = 8.2$  Hz, 2H), 7.21 (s, 1H), 6.33 (s, 1H), 4.57 (dd,  $J = 9.8, 7.2$  Hz, 1H), 3.47 (dd,  $J = 11.2, 7.1$  Hz, 1H), 3.28 (t,  $J = 10.6$  Hz, 1H), 2.31 (dd,  $J = 14.7, 6.1$  Hz, 1H), 1.83 – 1.67 (m, 2H), 0.94 (t,  $J = 6.1$  Hz, 6H);  $^{19}F$  NMR (376 MHz,  $CDCl_3$ )  $\delta$  -63.12;  $^{13}C$  NMR (126 MHz,  $CDCl_3$ )  $\delta$  204.84, 167.27, 136.37, 134.12 ( $J_{C-F} = 198.0$  Hz), 127.60, 125.98 ( $J_{C-F} = 21.0$  Hz), 77.11, 71.85, 35.61, 32.15, 24.45, 24.22, 23.19. **HRMS** (ESI) calcd. for  $C_{16}H_{18}NO_3F_3SNa^+$   $[M+Na]^+$  384.0852, found 384.0843; **HPLC**: The ee value was 68%,  $t_R$  (minor) = 6.827 min,  $t_R$  (major) = 7.997 min (Chiralcel OD-H, *n*-hexane/*i*-PrOH = 90:10, flow rate = 1 mL/min, UV = 254 nm).

***N*-(4-hydroxy-3-isobutyl-2-oxotetrahydrothiophen-3-yl)-3,5-dimethylbenzamide (3k)**

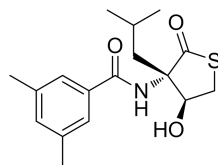

Afforded according to the general procedure as a white solid in 71% yield; m.p. = 125.5-127.0 °C;  $[\alpha]^{20}_D = -13.14$  ( $c = 1.0$ ,  $CH_2Cl_2$ );  $^1H$  NMR (400 MHz,  $CDCl_3$ )  $\delta$  7.38 (s, 2H), 7.19 (s, 1H), 7.13 (s, 1H), 6.63 (s, 1H), 4.53 (dd,  $J = 9.8, 7.2$  Hz, 1H), 3.44 (dd,  $J = 11.2, 7.1$  Hz, 1H), 3.25 (dd,  $J = 11.1,$

10.0 Hz, 1H), 2.37 (s, 6H), 2.32 (dd,  $J = 15.0, 6.3$  Hz, 1H), 1.82 – 1.70 (m, 1H), 1.66 (dd,  $J = 15.0, 5.4$  Hz, 1H), 0.92 (dd,  $J = 6.6, 3.7$  Hz, 6H);  $^{13}\text{C}$  NMR (101 MHz,  $\text{CDCl}_3$ )  $\delta$  205.21, 169.07, 138.71, 134.12, 133.02, 124.79, 77.35, 71.64, 35.56, 32.19, 24.47, 24.30, 23.13, 21.24; **HRMS** (ESI) calcd. for  $\text{C}_{17}\text{H}_{24}\text{NO}_3\text{S}^+$   $[\text{M}+\text{H}]^+$  322.1471, found 322.1478; **HPLC**: The ee value was 62%,  $t_{\text{R}}$  (minor) = 9.997 min,  $t_{\text{R}}$  (major) = 9.160 min (Chiralcel OD-H,  $n$ -hexane/ $i$ -PrOH = 95:5, flow rate = 1 mL/min, UV = 254 nm).

***N*-(3-benzyl-4-hydroxy-2-oxotetrahydrothiophen-3-yl)benzamide (3l)**

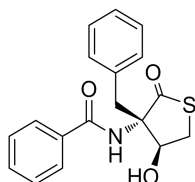

Afforded according to the general procedure as a white solid in 91% yield; m.p. = 105.9-106.4 °C;  $[\alpha]_{\text{D}}^{20} = +8.74$  ( $c = 1.0$ ,  $\text{CH}_2\text{Cl}_2$ );  $^1\text{H}$  NMR (500 MHz,  $\text{CDCl}_3$ )  $\delta$  7.65 (d,  $J = 7.2$  Hz, 2H), 7.57 (t,  $J = 7.4$  Hz, 1H), 7.45 (t,  $J = 7.8$  Hz, 2H), 7.30 – 7.23 (m, 3H), 7.08 (dd,  $J = 7.6, 1.6$  Hz, 2H), 6.80 (s, 1H), 6.74 (s, 1H), 4.73 (dd,  $J = 9.9, 7.3$  Hz, 1H), 3.67 (d,  $J = 14.2$  Hz, 1H), 3.56 (dd,  $J = 11.2, 7.2$  Hz, 1H), 3.37 (dd,  $J = 11.1, 10.1$  Hz, 1H), 3.09 (d,  $J = 14.2$  Hz, 1H);  $^{13}\text{C}$  NMR (101 MHz,  $\text{CDCl}_3$ )  $\delta$  203.27, 169.19, 133.71, 133.02, 132.51, 130.65, 128.83, 128.25, 127.40, 127.17, 76.46, 72.25, 33.86, 32.17; **HRMS** (ESI) calcd. for  $\text{C}_{18}\text{H}_{17}\text{NO}_3\text{SNa}^+$   $[\text{M}+\text{Na}]^+$  350.0821, found 350.0805; **HPLC**: The ee value was 71%,  $t_{\text{R}}$  (minor) = 8.09 min,  $t_{\text{R}}$  (major) = 5.51 min (Chiralcel OD-H,  $n$ -hexane/ $i$ -PrOH = 90:10, flow rate = 1 mL/min, UV = 254 nm).

***N*-(4-hydroxy-3-isobutyl-2-oxotetrahydrothiophen-3-yl)thiophene-2-carboxamide (3m)**

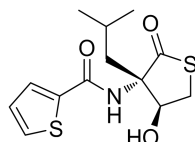

Afforded according to the general procedure as a light yellow solid in 98% yield; m.p. = 95.0-96.0 °C;  $[\alpha]_{\text{D}}^{20} = -22.45$  ( $c = 1.0$ ,  $\text{CH}_2\text{Cl}_2$ );  $^1\text{H}$  NMR (400 MHz,  $\text{CDCl}_3$ )  $\delta$  7.57 (d,  $J = 3.7$  Hz, 2H), 7.12 (t,  $J = 4.2$  Hz, 1H), 6.98 (s, 1H), 6.33 (s, 1H), 4.54 (t,  $J = 8.4$  Hz, 1H), 3.44 (dd,  $J = 10.9, 7.3$  Hz, 1H), 3.24 (t,  $J = 10.6$  Hz, 1H), 2.26 (dd,  $J = 14.8, 6.5$  Hz, 1H), 1.81 – 1.61 (m, 2H), 0.93 (d,  $J = 6.4$  Hz, 6H);  $^{13}\text{C}$  NMR (101 MHz,  $\text{CDCl}_3$ )  $\delta$  204.75, 163.15, 137.46, 131.67, 129.20, 128.09, 77.17, 71.83, 35.69, 32.15, 24.50, 24.15, 23.22; **HRMS** (ESI) calcd. for  $\text{C}_{13}\text{H}_{18}\text{NO}_3\text{S}_2^+$   $[\text{M}+\text{H}]^+$  300.0723, found 300.0714; **HPLC**: The ee value was 66%,  $t_{\text{R}}$  (minor) = 11.627 min,  $t_{\text{R}}$  (major) = 7.260 min (Chiralcel OD-H,  $n$ -hexane/ $i$ -PrOH = 90:10, flow rate = 1 mL/min, UV = 254 nm).

***N*-(4-hydroxy-3-isobutyl-2-oxotetrahydrothiophen-3-yl)furan-2-carboxamide (3n)**

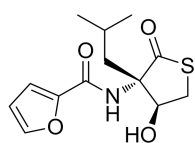

Afforded according to the general procedure as a lightyellow oil in 98% yield;  $[\alpha]_{\text{D}}^{20} = -19.35$  ( $c =$

1.0, CH<sub>2</sub>Cl<sub>2</sub>); **<sup>1</sup>H NMR** (400 MHz, CDCl<sub>3</sub>) δ 7.53 (s, 1H), 7.34 (s, 1H), 7.16 (d, *J* = 3.5 Hz, 1H), 6.55 (dd, *J* = 3.4, 1.7 Hz, 1H), 6.36 (s, 1H), 4.53 (dd, *J* = 9.8, 7.2 Hz, 1H), 3.43 (dd, *J* = 11.2, 7.1 Hz, 1H), 3.29 – 3.18 (m, 1H), 2.23 (dd, *J* = 14.9, 6.6 Hz, 1H), 1.81 – 1.70 (m, 1H), 1.67 (dd, *J* = 15.0, 5.3 Hz, 1H), 0.91 (dd, *J* = 6.6, 2.8 Hz, 6H); **<sup>13</sup>C NMR** (101 MHz, CDCl<sub>3</sub>) δ 204.30, 159.37, 146.71, 145.18, 115.81, 112.51, 71.51, 35.84, 32.07, 24.47, 24.07, 23.14; **HRMS** (ESI) calcd. for C<sub>13</sub>H<sub>18</sub>NO<sub>4</sub>S<sup>+</sup> [M+H]<sup>+</sup> 284.0951, found 284.0958; **HPLC**: The ee value was 77%, *t<sub>R</sub>* (minor) = 12.220 min, *t<sub>R</sub>* (major) = 6.477 min (Chiralcel OD-H, *n*-hexane/*i*-PrOH = 90:10, flow rate = 1 mL/min, UV = 254 nm).

***N*-(4-hydroxy-3-isobutyl-2-oxotetrahydrothiophen-3-yl)-1-naphthamide (3o)**

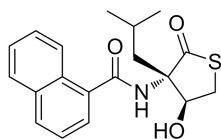

Afforded according to the general procedure as a colourless solid in 96% yield; m.p. = 149.5-151.0 °C; [α]<sub>D</sub><sup>20</sup> = -14.78 (c = 1.0, CH<sub>2</sub>Cl<sub>2</sub>); **<sup>1</sup>H NMR** (400 MHz, CDCl<sub>3</sub>) δ 8.30 (d, *J* = 8.3 Hz, 1H), 7.98 (d, *J* = 8.3 Hz, 1H), 7.90 (d, *J* = 7.2 Hz, 1H), 7.64 (dd, *J* = 7.1, 1.1 Hz, 1H), 7.62 – 7.52 (m, 2H), 7.48 (dd, *J* = 8.2, 7.2 Hz, 1H), 7.05 (s, 1H), 6.55 (s, 1H), 4.71 (dd, *J* = 9.6, 7.4 Hz, 1H), 3.49 (dd, *J* = 11.3, 7.1 Hz, 1H), 3.30 (dd, *J* = 11.2, 9.9 Hz, 1H), 2.44 (dd, *J* = 15.0, 5.6 Hz, 1H), 1.89 – 1.78 (m, 1H), 1.75 (dd, *J* = 15.0, 5.8 Hz, 1H), 1.02 (d, *J* = 6.6 Hz, 3H), 0.95 (d, *J* = 6.5 Hz, 3H); **<sup>13</sup>C NMR** (101 MHz, CDCl<sub>3</sub>) δ 204.68, 171.27, 133.80, 132.62, 131.73, 129.95, 128.57, 127.59, 126.75, 125.24, 124.92, 124.63, 77.41, 72.14, 36.02, 32.22, 24.69, 24.44, 23.17; **HRMS** (ESI) calcd. for C<sub>19</sub>H<sub>22</sub>NO<sub>3</sub>S<sup>+</sup> [M+H]<sup>+</sup> 344.1315, found 344.1309; **HPLC**: The ee value was 83%, *t<sub>R</sub>* (minor) = 13.280 min, *t<sub>R</sub>* (major) = 16.510 min (Chiralcel OD-H, *n*-hexane/*i*-PrOH = 80:20, flow rate = 1 mL/min, UV = 254 nm).

***N*-(4-hydroxy-3-isobutyl-2-oxotetrahydrothiophen-3-yl)-2-naphthamide (3p)**

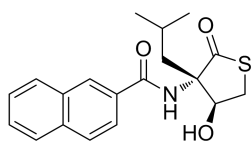

Afforded according to the general procedure as a colourless solid in 83% yield; m.p. = 146.0-146.6 °C; [α]<sub>D</sub><sup>20</sup> = -9.70 (c = 1.0, CH<sub>2</sub>Cl<sub>2</sub>); **<sup>1</sup>H NMR** (400 MHz, CDCl<sub>3</sub>) δ 8.33 (s, 1H), 7.99 – 7.87 (m, 3H), 7.83 (d, *J* = 8.6 Hz, 1H), 7.64 – 7.55 (m, 2H), 7.32 (s, 1H), 6.64 (s, 1H), 4.60 (dd, *J* = 9.6, 7.3 Hz, 1H), 3.47 (dd, *J* = 11.1, 7.1 Hz, 1H), 3.28 (t, *J* = 10.5 Hz, 1H), 2.37 (dd, *J* = 15.0, 6.4 Hz, 1H), 1.86 – 1.75 (m, 1H), 1.71 (dd, *J* = 15.1, 5.3 Hz, 1H), 0.94 (dd, *J* = 6.4, 3.7 Hz, 6H); **<sup>13</sup>C NMR** (101 MHz, CDCl<sub>3</sub>) δ 205.18, 168.69, 135.12, 132.54, 130.19, 129.14, 128.93, 128.28, 128.03, 127.82, 127.15, 123.14, 77.33, 71.80, 35.62, 32.23, 24.53, 24.28, 23.22; **HRMS** (ESI) calcd. for C<sub>19</sub>H<sub>21</sub>NO<sub>3</sub>SSNa<sup>+</sup> [M+Na]<sup>+</sup> 366.1134, found 366.1123; **HPLC**: The ee value was 79%, *t<sub>R</sub>* (minor) = 7.280 min, *t<sub>R</sub>* (major) = 6.407 min (Chiralcel OD-H, *n*-hexane/*i*-PrOH = 80:20, flow rate = 1 mL/min, UV = 254 nm).



***N*-(4-hydroxy-2-oxo-3-phenethyltetrahydrothiophen-3-yl)-1-naphthamide (3q)**

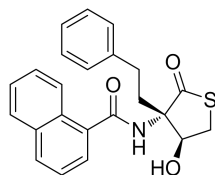

Afforded according to the general procedure as a colourless oil in 94% yield;  $[\alpha]^{20}_{\text{D}} = -18.33$  ( $c = 1.0$ ,  $\text{CH}_2\text{Cl}_2$ ); **<sup>1</sup>H NMR** (400 MHz,  $\text{CDCl}_3$ )  $\delta$  8.32 (d,  $J = 8.4$  Hz, 1H), 7.98 (d,  $J = 8.2$  Hz, 1H), 7.92 – 7.88 (m, 1H), 7.64 – 7.54 (m, 3H), 7.47 (dd,  $J = 8.1, 7.2$  Hz, 1H), 7.30 – 7.16 (m, 5H), 7.00 (s, 1H), 6.51 (s, 1H), 4.81 (dd,  $J = 9.6, 7.6$  Hz, 1H), 3.54 (dd,  $J = 11.3, 7.2$  Hz, 1H), 3.32 (dd,  $J = 11.2, 10.0$  Hz, 1H), 2.86 (ddd,  $J = 14.4, 12.2, 5.4$  Hz, 1H), 2.80 – 2.62 (m, 2H), 2.07 (ddd,  $J = 14.5, 11.5, 5.0$  Hz, 1H); **<sup>13</sup>C NMR** (101 MHz,  $\text{CDCl}_3$ )  $\delta$  204.12, 171.43, 140.59, 133.80, 132.40, 131.79, 129.98, 128.68, 128.65, 128.60, 128.38, 127.65, 126.77, 126.34, 125.39, 124.91, 124.61, 72.13, 60.41, 32.33, 29.62, 29.16, 21.07, 14.23; **HRMS** (ESI) calcd. for  $\text{C}_{23}\text{H}_{21}\text{NO}_3\text{SNa}^+$   $[\text{M}+\text{Na}]^+$  414.1134, found 414.1135; **HPLC**: The ee value was 70%,  $t_{\text{R}}$  (minor) = 9.320 min,  $t_{\text{R}}$  (major) = 15.423 min (Chiralcel OD-H,  $n$ -hexane/ $i$ -PrOH = 75:25, flow rate = 1 mL/min, UV = 254 nm).

***N*-(4-hydroxy-3-(2-(methylthio)ethyl)-2-oxotetrahydrothiophen-3-yl)-1-naphthamide (3r)**

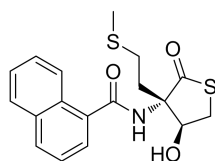

Afforded according to the general procedure as a light yellow solid in 93% yield; m.p. = 136.5–137.6 °C;  $[\alpha]^{20}_{\text{D}} = -11.82$  ( $c = 1.0$ ,  $\text{CH}_2\text{Cl}_2$ ); **<sup>1</sup>H NMR** (400 MHz,  $\text{CDCl}_3$ )  $\delta$  8.29 (d,  $J = 8.2$  Hz, 1H), 7.98 (d,  $J = 8.3$  Hz, 1H), 7.90 (d,  $J = 7.8$  Hz, 1H), 7.66 (d,  $J = 7.0$  Hz, 1H), 7.63 – 7.52 (m, 2H), 7.49 (t,  $J = 7.6$  Hz, 1H), 6.98 (s, 1H), 6.43 (s, 1H), 4.85 – 4.70 (m, 1H), 3.54 (dd,  $J = 11.3, 7.2$  Hz, 1H), 3.31 (t,  $J = 10.6$  Hz, 1H), 2.90 – 2.77 (m, 1H), 2.65 – 2.46 (m, 2H), 2.12 (s, 3H), 2.11 – 2.02 (m, 1H); **<sup>13</sup>C NMR** (101 MHz,  $\text{CDCl}_3$ )  $\delta$  203.84, 171.42, 133.80, 132.28, 131.90, 129.94, 128.62, 127.69, 126.81, 125.44, 124.84, 124.61, 76.92, 71.86, 32.30, 27.96, 27.67, 15.72; **HRMS** (ESI) calcd. for  $\text{C}_{18}\text{H}_{19}\text{NO}_3\text{S}_2\text{Na}^+$   $[\text{M}+\text{Na}]^+$  384.0699, found 384.0680; **HPLC**: The ee value was 66%,  $t_{\text{R}}$  (minor) = 10.943 min,  $t_{\text{R}}$  (major) = 18.093 min (Chiralcel OD-H,  $n$ -hexane/ $i$ -PrOH = 80:20, flow rate = 1 mL/min, UV = 254 nm).

***N*-(3-butyl-4-hydroxy-2-oxotetrahydrothiophen-3-yl)-1-naphthamide (3s)**

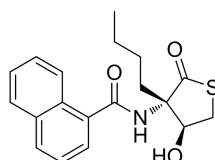

Afforded according to the general procedure as a colourless solid in 92% yield; m.p. = 91.5–93.0 °C;  $[\alpha]^{20}_{\text{D}} = 3.50$  ( $c = 1.0$ ,  $\text{CH}_2\text{Cl}_2$ ); **<sup>1</sup>H NMR** (400 MHz,  $\text{CDCl}_3$ )  $\delta$  8.27 (d,  $J = 8.2$  Hz, 1H), 7.95 (d,  $J = 8.2$  Hz, 1H), 7.88 (d,  $J = 8.0$  Hz, 1H), 7.63 (d,  $J = 7.0$  Hz, 1H), 7.61 – 7.50 (m, 2H), 7.46 (t,  $J = 7.6$  Hz, 1H), 6.96 (s, 1H), 6.52 (s, 1H), 4.81 – 4.72 (m, 1H), 3.49 (dd,  $J = 11.1, 7.2$  Hz, 1H),

3.29 (t,  $J$  = 10.6 Hz, 1H), 2.51 (dd,  $J$  = 18.4, 8.1 Hz, 1H), 1.82 – 1.70 (m, 1H), 1.45 – 1.27 (m, 4H), 0.92 (t,  $J$  = 6.6 Hz, 3H);  $^{13}\text{C}$  NMR (101 MHz,  $\text{CDCl}_3$ )  $\delta$  204.17, 171.34, 133.80, 132.65, 131.67, 129.98, 128.55, 127.56, 126.73, 125.31, 124.90, 124.62, 76.83, 72.24, 32.26, 27.49, 24.73, 22.80, 13.90; **HRMS** (ESI) calcd. for  $\text{C}_{19}\text{H}_{21}\text{NO}_3\text{SNa}^+ [\text{M}+\text{Na}]^+$  366.1134, found 366.1121; **HPLC**: The ee value was 84%,  $t_{\text{R}}$  (minor) = 8.533 min,  $t_{\text{R}}$  (major) = 10.427 min (Chiralcel OD-H,  $n$ -hexane/ $i$ -PrOH = 80:20, flow rate = 1 mL/min, UV = 254 nm).

#### ***N*-(3-benzyl-4-hydroxy-2-oxotetrahydrothiophen-3-yl)-1-naphthamide (3t)**

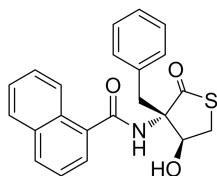

Afforded according to the general procedure as a colourless solid in 91% yield; m.p. = 101.7-102.5 °C;  $[\alpha]_{\text{D}}^{20} = 10.91$  ( $c$  = 1.0,  $\text{CH}_2\text{Cl}_2$ );  $^1\text{H}$  NMR (400 MHz,  $\text{CDCl}_3$ )  $\delta$  8.25 (d,  $J$  = 8.3 Hz, 1H), 7.86 (d,  $J$  = 7.8 Hz, 1H), 7.80 (d,  $J$  = 7.9 Hz, 1H), 7.54 – 7.44 (m, 2H), 7.34 – 7.24 (m, 2H), 7.23 – 7.16 (m, 3H), 7.12 (d,  $J$  = 4.9 Hz, 2H), 6.71 (s, 1H), 6.59 (s, 1H), 4.81 – 4.73 (m, 1H), 3.72 (d,  $J$  = 14.2 Hz, 1H), 3.49 (dd,  $J$  = 11.2, 7.2 Hz, 1H), 3.29 (t,  $J$  = 10.6 Hz, 1H), 3.08 (d,  $J$  = 14.2 Hz, 1H);  $^{13}\text{C}$  NMR (101 MHz,  $\text{CDCl}_3$ )  $\delta$  203.29, 171.42, 133.80, 133.77, 132.04, 131.89, 130.86, 130.05, 128.55, 128.36, 127.58, 127.49, 126.66, 125.70, 124.95, 124.50, 76.86, 72.60, 34.05, 32.21; **HRMS** (ESI) calcd. for  $\text{C}_{22}\text{H}_{19}\text{NO}_3\text{SNa}^+ [\text{M}+\text{Na}]^+$  400.0978, found 400.0967; **HPLC**: The ee value was 72%,  $t_{\text{R}}$  (minor) = 11.260 min,  $t_{\text{R}}$  (major) = 12.947 min (Chiralcel OD-H,  $n$ -hexane/ $i$ -PrOH = 80:20, flow rate = 1 mL/min, UV = 254 nm).

#### **General Procedure for the Synthesis of compound 4.<sup>7</sup>**

To a stirred solution of pyridinium dichromate (PDC, 1.0 mmol) in dichloromethane (2.5 mL), **3a** (0.5 mmol) was added. After reflux at 40 °C for about 12 h, the mixture was concentrated in vacuo and purified by flash column chromatography (PE/EA = 10 /1) to afford the product **4**.

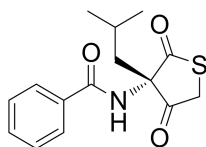

As a white solid in 98% yield; m.p. = 151.0-152.4 °C;  $[\alpha]_{\text{D}}^{20} = +6.84$  ( $c$  = 1.0,  $\text{CH}_2\text{Cl}_2$ );  $^1\text{H}$  NMR (400 MHz,  $\text{CDCl}_3$ )  $\delta$  7.74 (d,  $J$  = 7.4 Hz, 2H), 7.54 (t,  $J$  = 7.4 Hz, 1H), 7.43 (t,  $J$  = 7.6 Hz, 2H), 6.85 (s, 1H), 4.23 (d,  $J$  = 17.4 Hz, 1H), 4.05 (d,  $J$  = 17.4 Hz, 1H), 1.97 – 1.75 (m, 3H), 1.02 (dd,  $J$  = 6.4, 2.5 Hz, 6H);  $^{13}\text{C}$  NMR (101 MHz,  $\text{CDCl}_3$ )  $\delta$  201.53, 200.65, 166.71, 132.63, 131.25, 128.75, 127.40, 65.66, 43.05, 38.96, 24.13, 24.09, 24.04; **HRMS** (ESI) calcd for  $\text{C}_{15}\text{H}_{18}\text{NO}_3\text{S}^+ [\text{M}+\text{H}]^+$  292.1002, found 292.0995; **HPLC**: The ee value was 63%,  $t_{\text{R}}$  (minor) = 16.307 min,  $t_{\text{R}}$  (major) = 11.083 min (Chiralcel OD-H,  $n$ -hexane/ $i$ -PrOH = 90:10, flow rate = 1 mL/min, UV = 254 nm).

#### **General Procedure for the Synthesis of compound 5.**

To a flame-dried 50 mL round bottom flask, containing a stir bar, was added **3a** (0.2 mmol), anhydrous CH<sub>2</sub>Cl<sub>2</sub> (2 mL), and pyridine (0.2 mmol) under an atmosphere of N<sub>2</sub>. After cooling in an ice bath, trifluoromethanesulfonic anhydride (0.24 mmol) was added dropwise. The reaction was then allowed to warm to room temperature with stirring. After 3 h, the reaction was diluted with H<sub>2</sub>O and extracted into CH<sub>2</sub>Cl<sub>2</sub>. The organic layers were combined, dried over NaSO<sub>4</sub>, and filtered. The filtrate was concentrated in vacuo and purified by flash column chromatography (PE/EA = 10 /1) to afforded the product **5**.

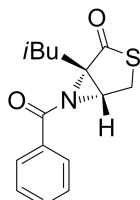

As a white oil in 96% yield;  $[\alpha]_D^{20} = -5.20$  ( $c = 1.0$ , CH<sub>2</sub>Cl<sub>2</sub>); **<sup>1</sup>H NMR** (400 MHz, CDCl<sub>3</sub>)  $\delta$  8.03 – 7.93 (m, 2H), 7.55 – 7.46 (m, 1H), 7.40 (dd,  $J = 10.5, 4.6$  Hz, 2H), 5.29 (dd,  $J = 5.9, 1.4$  Hz, 1H), 3.75 (dd,  $J = 13.2, 5.9$  Hz, 1H), 3.65 (dd,  $J = 13.2, 1.5$  Hz, 1H), 1.98 (qd,  $J = 14.3, 6.5$  Hz, 2H), 1.77 (tt,  $J = 13.3, 6.7$  Hz, 1H), 0.98 (dd,  $J = 9.1, 6.6$  Hz, 6H); **<sup>13</sup>C NMR** (101 MHz, CDCl<sub>3</sub>)  $\delta$  205.04, 164.01, 132.08, 128.70, 128.43, 126.47, 87.59, 83.80, 43.24, 34.62, 24.73, 24.16, 23.72; **HRMS** (ESI) calcd for C<sub>15</sub>H<sub>18</sub>NO<sub>2</sub>S<sup>+</sup> [M+H]<sup>+</sup> 276.1053, found 276.1044; **HPLC**: The ee value was 68%,  $t_R$  (minor) = 7.803 min,  $t_R$  (major) = 6.400 min (Chiralcel OD-H, *n*-hexane/*i*-PrOH = 90:10, flow rate = 1 mL/min, UV = 254 nm).

**5. 1) X-Ray Crystallographic Data of 3a** (CCDC number: [1817567](#))

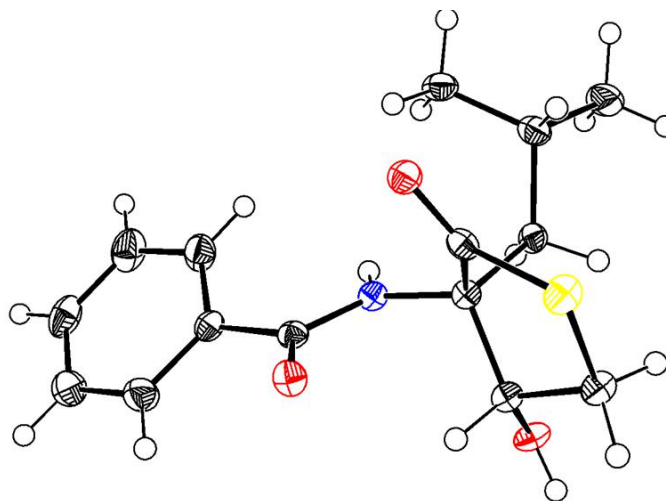

**2) X-Ray Crystallographic Data of 3a'** (CCDC number: [1817568](#))

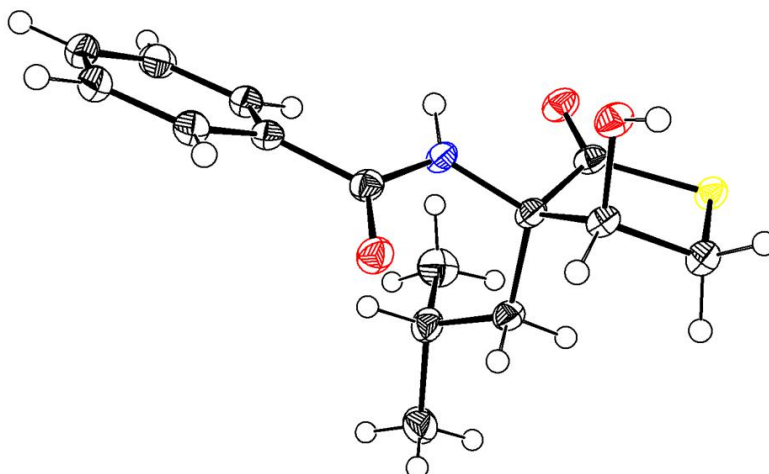


---

|                                                                                           |                                                    |                                                    |
|-------------------------------------------------------------------------------------------|----------------------------------------------------|----------------------------------------------------|
| Bond precision:                                                                           | C-C = 0.0020 Å                                     | Wavelength = 1.54184                               |
| Cell:                                                                                     | a = 6.54242 (11) b = 22.4359 (3) c = 10.03319 (17) |                                                    |
|                                                                                           | alpha = 90 beta = 102.1649 (17) gamma = 90         |                                                    |
| Temperature:                                                                              | 100 K                                              |                                                    |
|                                                                                           | Calculated                                         | Reported                                           |
| Volume                                                                                    | 1439.65 (4)                                        | 1439.65(4)                                         |
| Space group                                                                               | P 21/c                                             | P 1 21/c 1                                         |
| Hall group                                                                                | -P 2ybc                                            | -P 2ybc                                            |
| Moiety formula                                                                            | C <sub>15</sub> H <sub>19</sub> N O <sub>3</sub> S | C <sub>15</sub> H <sub>19</sub> N O <sub>3</sub> S |
| Sum formula                                                                               | C <sub>15</sub> H <sub>19</sub> N O <sub>3</sub> S | C <sub>15</sub> H <sub>19</sub> N O <sub>3</sub> S |
| Mr                                                                                        | 293.37                                             | 293.37                                             |
| D <sub>x</sub> , g cm <sup>-3</sup>                                                       | 1.301                                              | 1.301                                              |
| Z                                                                                         | 4                                                  | 4                                                  |
| Mu (mm <sup>-1</sup> )                                                                    | 1.981                                              | 1.981                                              |
| F <sub>000</sub>                                                                          | 624.0                                              | 624.0                                              |
| F <sub>000</sub> '                                                                        | 627.06                                             |                                                    |
| h,k,l <sub>max</sub>                                                                      | 11, 17, 12                                         | 11, 17, 12                                         |
| N <sub>ref</sub>                                                                          | 2667 [5038]                                        | 2663                                               |
| T <sub>min</sub> , T <sub>max</sub>                                                       | 0.653, 0.820                                       | 0.515, 1.000                                       |
| T <sub>min</sub> '                                                                        | 0.431                                              |                                                    |
| Correction method= # Reported T Limits: T <sub>min</sub> = 0.006 T <sub>max</sub> = 1.000 |                                                    |                                                    |
| AbsCorr = MULTI-SCAN                                                                      |                                                    |                                                    |
| Data completeness = 0.999                                                                 | Theta(max) = 67.079                                |                                                    |
| R(reflections) = 0.0297( 2520)                                                            | wR2(reflections) = 0.0756 ( 2663)                  |                                                    |
| S = 1.037                                                                                 | N <sub>par</sub> = 184                             |                                                    |

---

## 6. References

- [1] E. Badiola, B. Fiser, E. Gómez-Bengoia, A. Mielgo, I. Olaizola, I. Urruzuno, J. M. García, J. M. Odriozola, J. Razkin, M. Oiarbide and M. C. Palomo, *J. Am. Chem. Soc.*, 2014, **136**, 17869.
- [2] H. Zhou, H. Yang, M. Liu, C. Xia and G. Jiang, *Org. Lett.*, 2014, **16**, 5350.
- [3] S. A. Shaw, P. Aleman and E. Vedejs, *J. Am. Chem. Soc.*, 2003, **125**, 13368.
- [4] T. Yamamoto, R. Murakami and M. Suginome, *J. Am. Chem. Soc.*, 2017, **139**, 2557.
- [5] X. Liu, Y. Wang, D. Yang, J. Zhang, D. Liu and W. Su, *Angew. Chem. Int. Ed.*, 2016, **55**, 1.
- [6] E. Sorrentino, and S. J. Connon, *Org. Lett.*, 2016, **18**, 5204.
- [7] G. R. Pettit, N. Melody, F. Hempenstall, J.-C. Chapuis, T. L. Groy and L. Williams, *J. Nat. Prod.*, 2014, **77**, 863.

## 7. $^1\text{H}$ NMR, $^{13}\text{C}$ NMR and $^{19}\text{F}$ NMR, HPLC Spectra of All Products

### $^1\text{H}$ NMR of **2b**

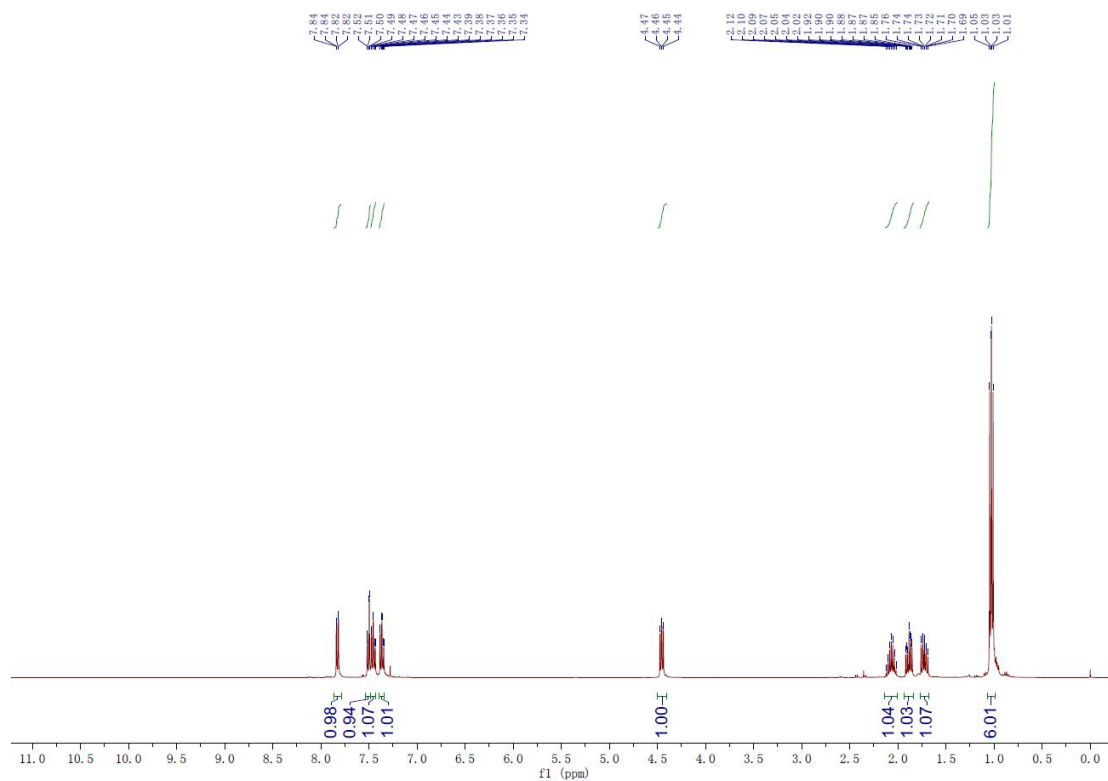

### $^{13}\text{C}$ NMR of **2b**

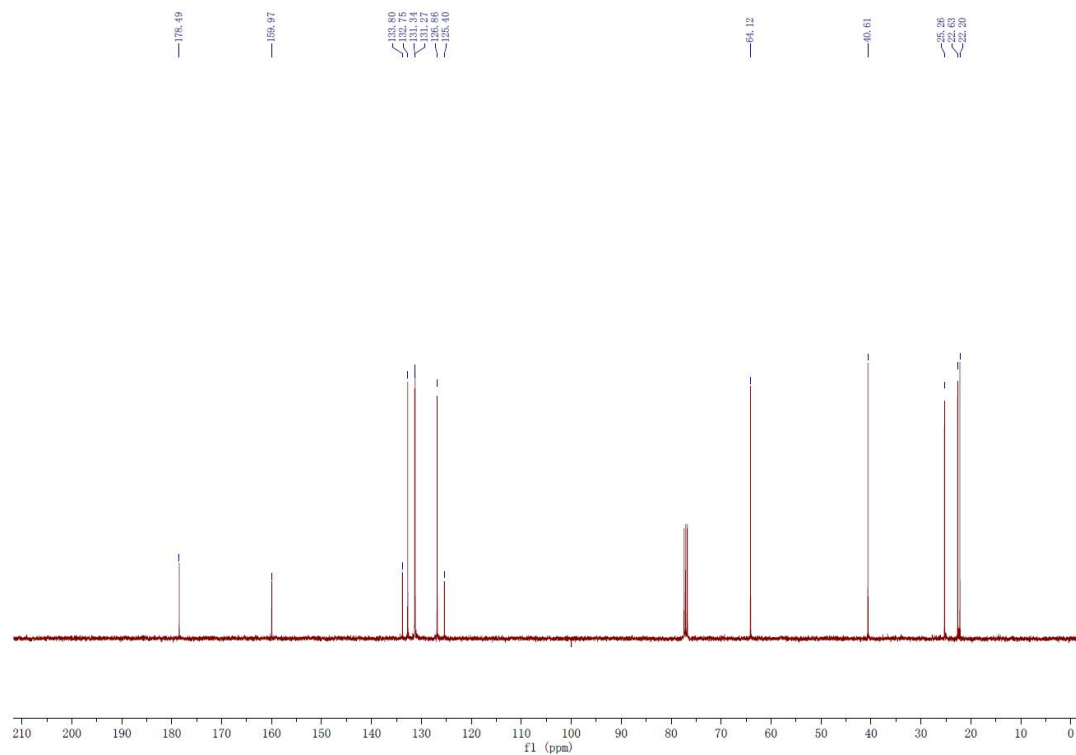

<sup>1</sup>H NMR of **2c**

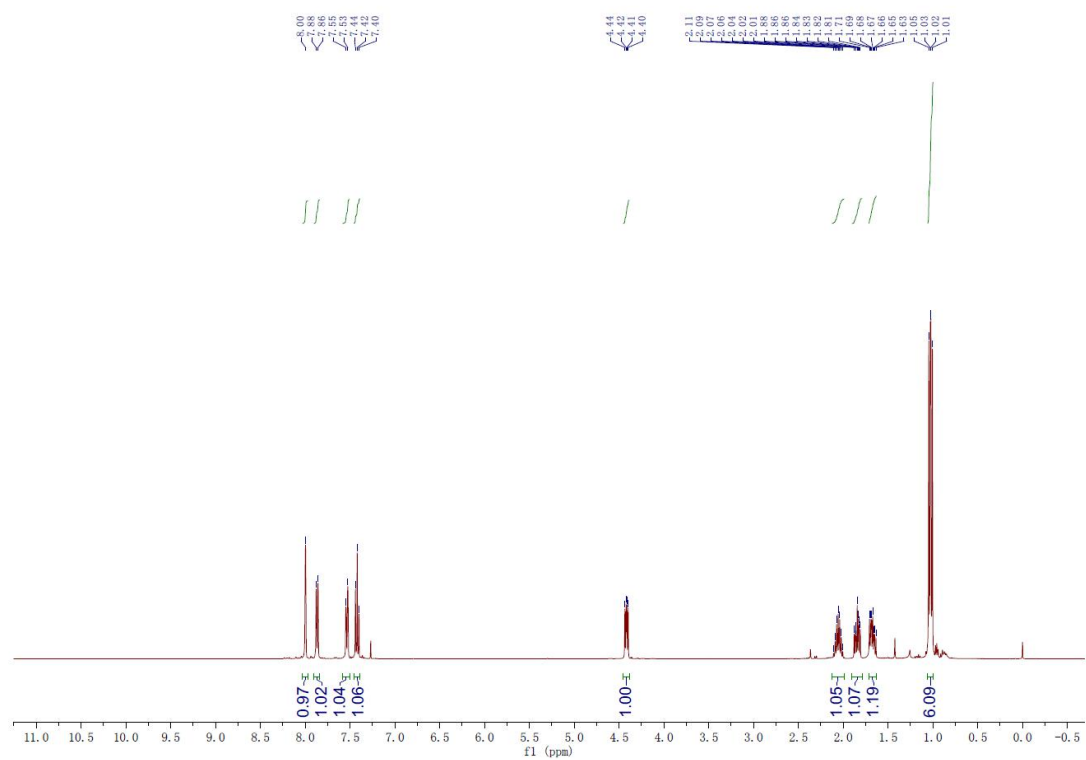

<sup>13</sup>C NMR of **2c**

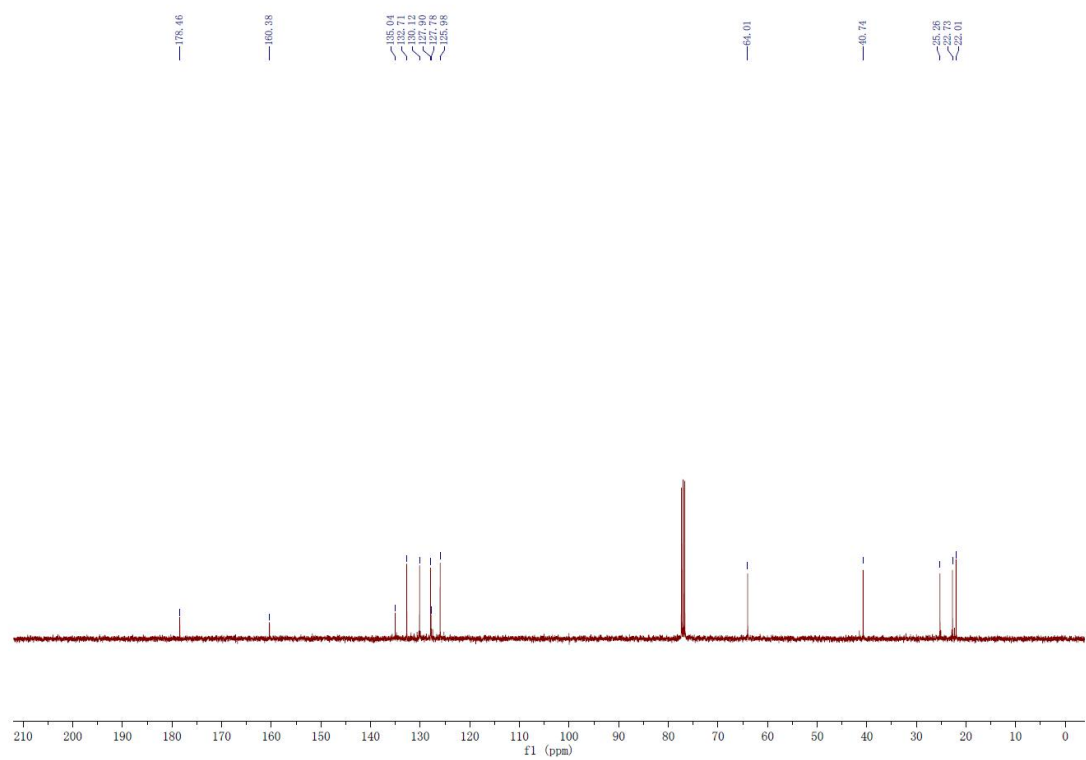



<sup>1</sup>H NMR of **2e**

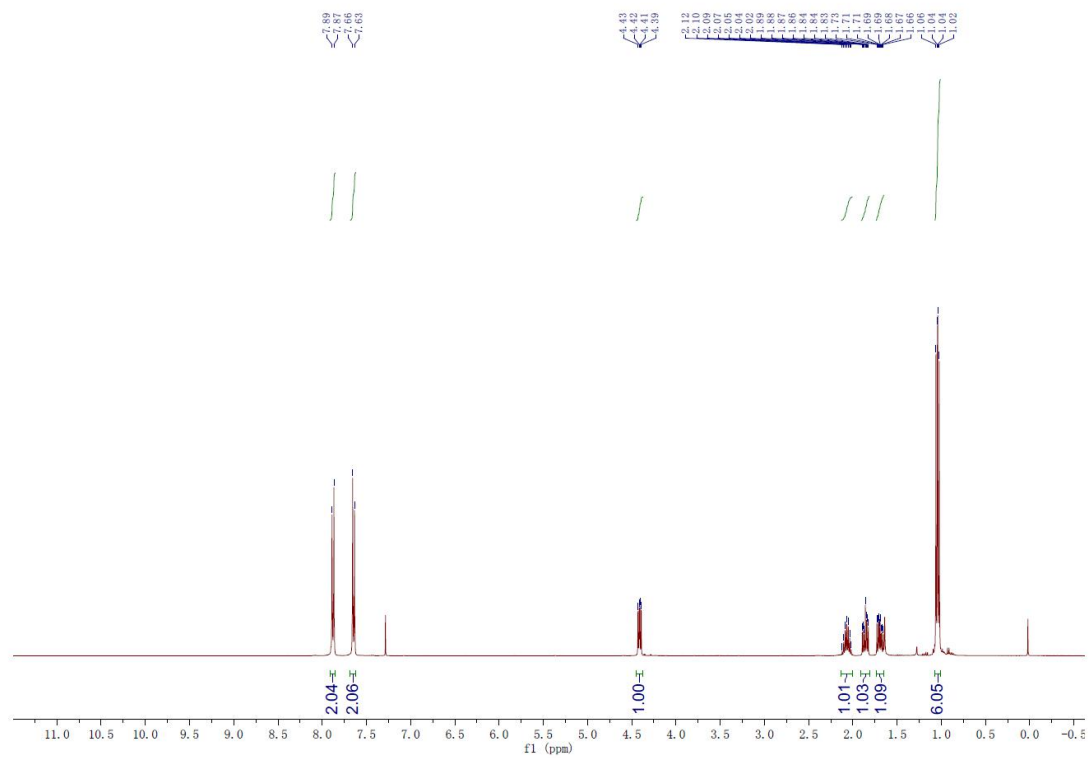

<sup>13</sup>C NMR of **2e**

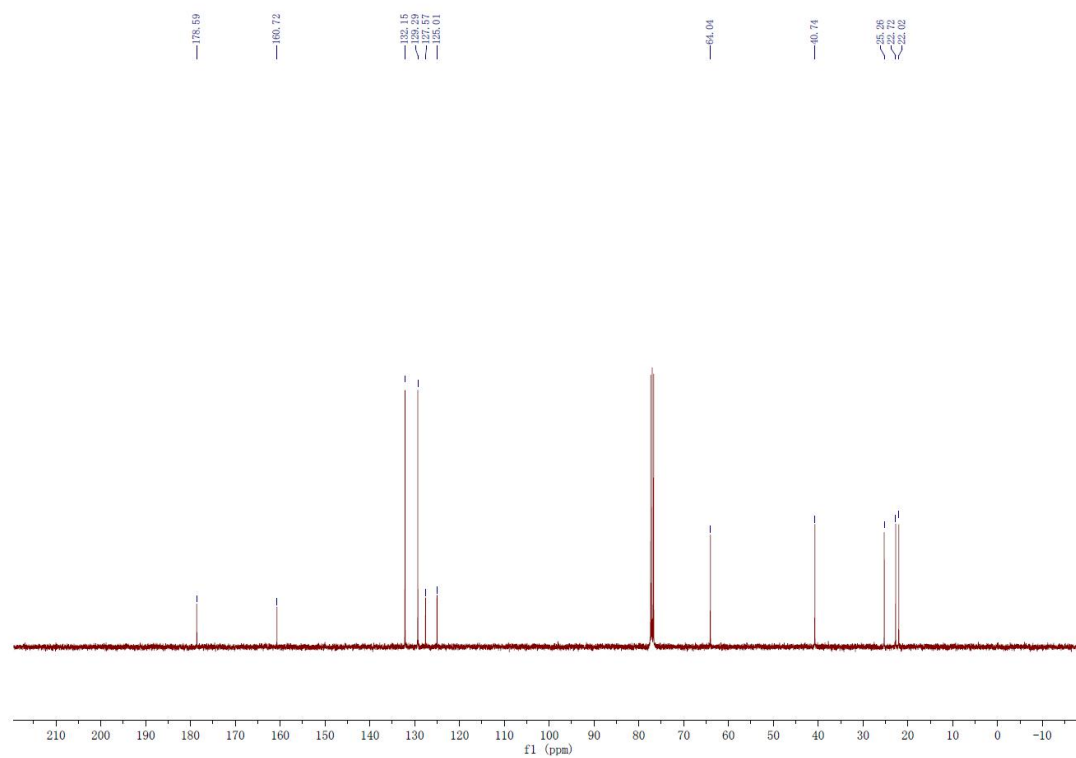

<sup>1</sup>H NMR of **2f**

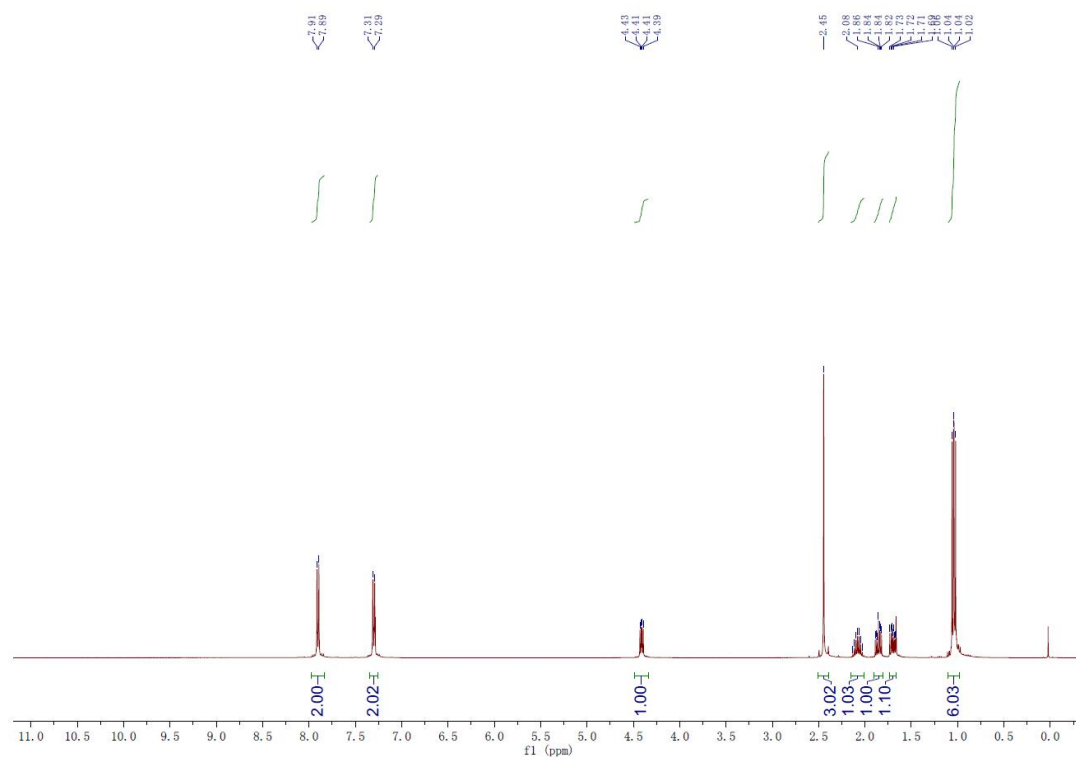

<sup>13</sup>C NMR of **2f**

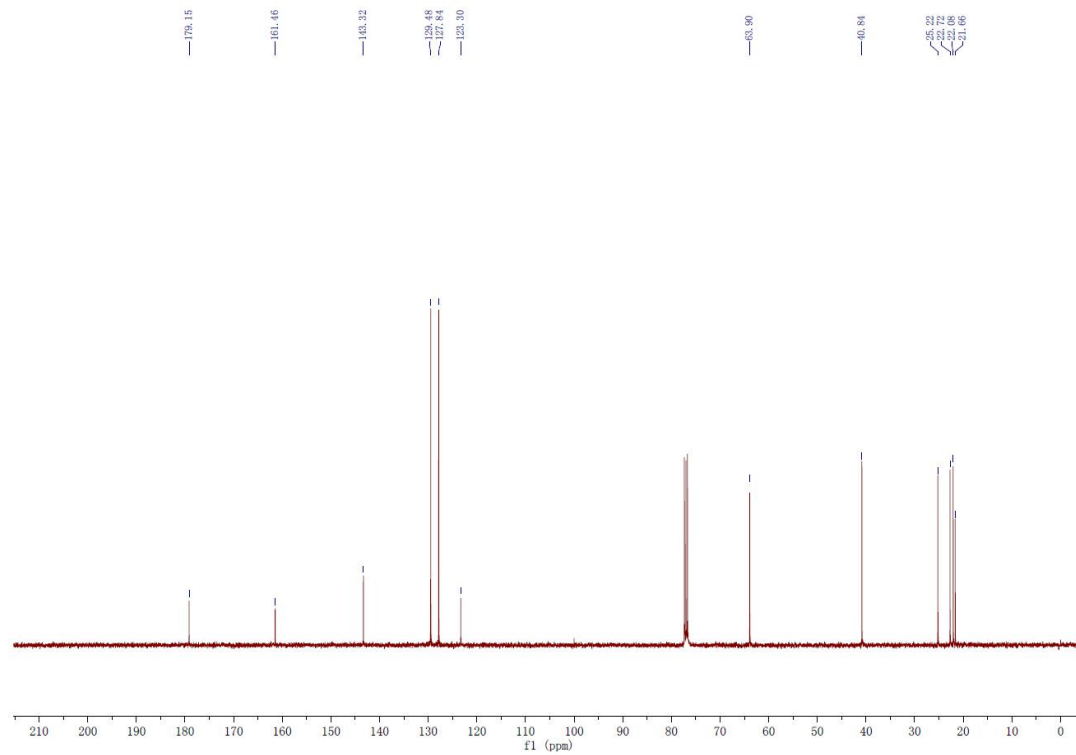

<sup>1</sup>H NMR of **2g**

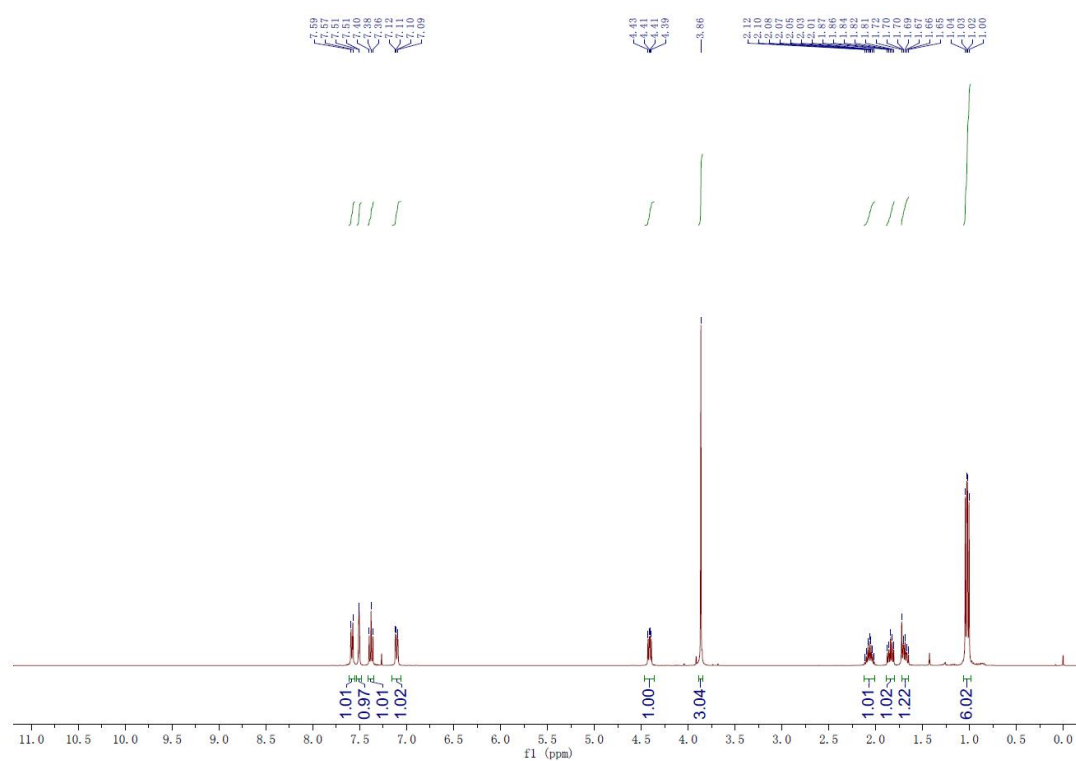

<sup>13</sup>C NMR of **2g**

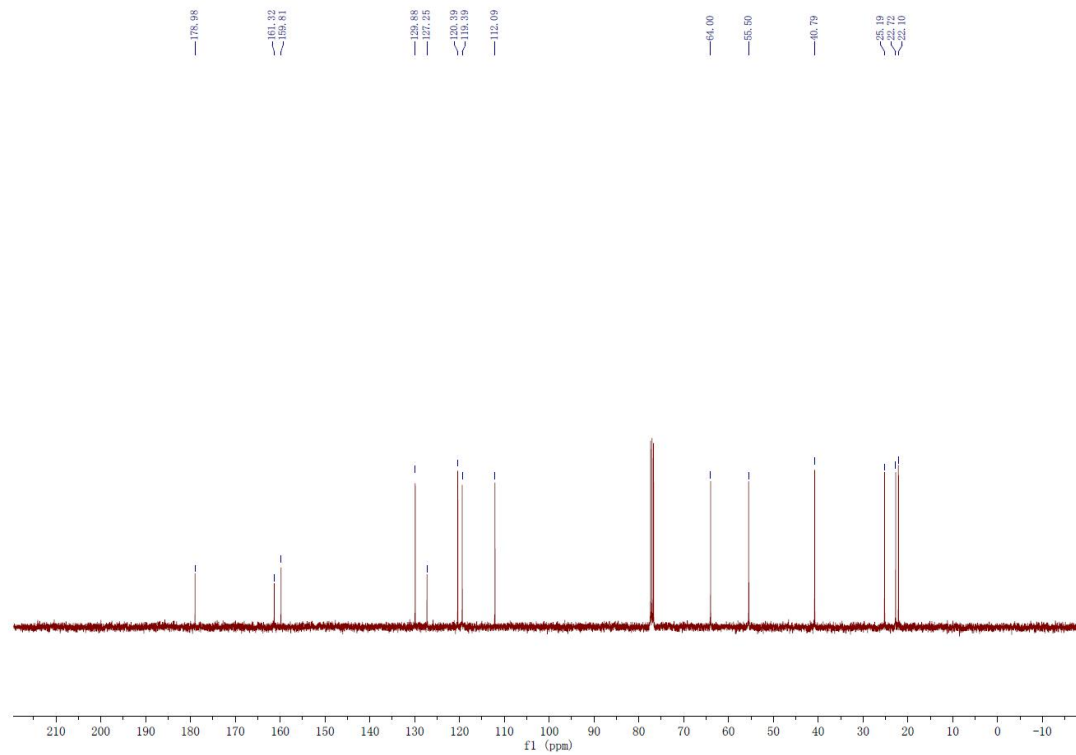

<sup>1</sup>H NMR of **2i**

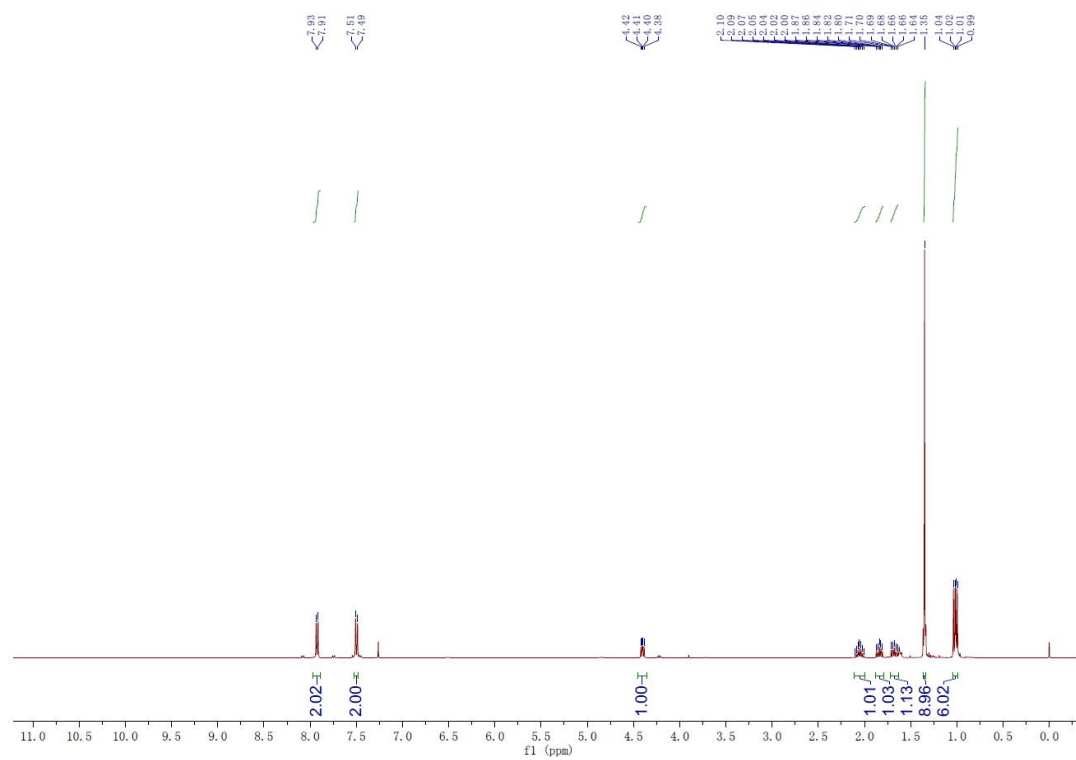

<sup>13</sup>C NMR of **2i**

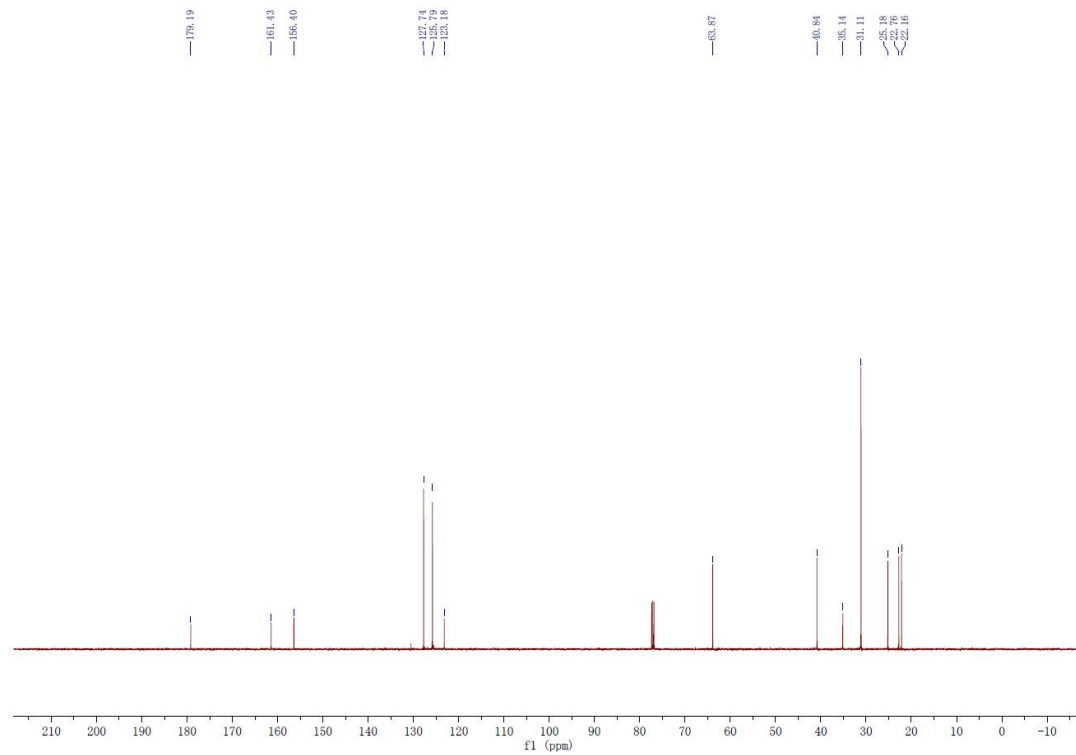

<sup>1</sup>H NMR of **2k**

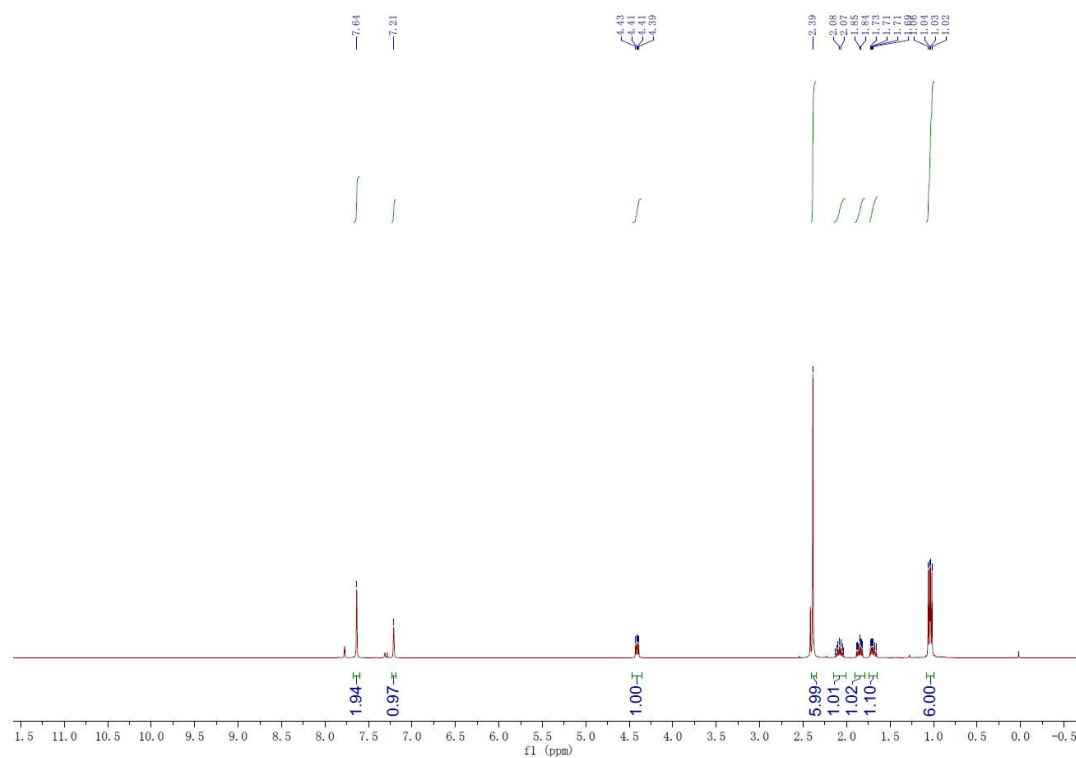

<sup>13</sup>C NMR of **2k**

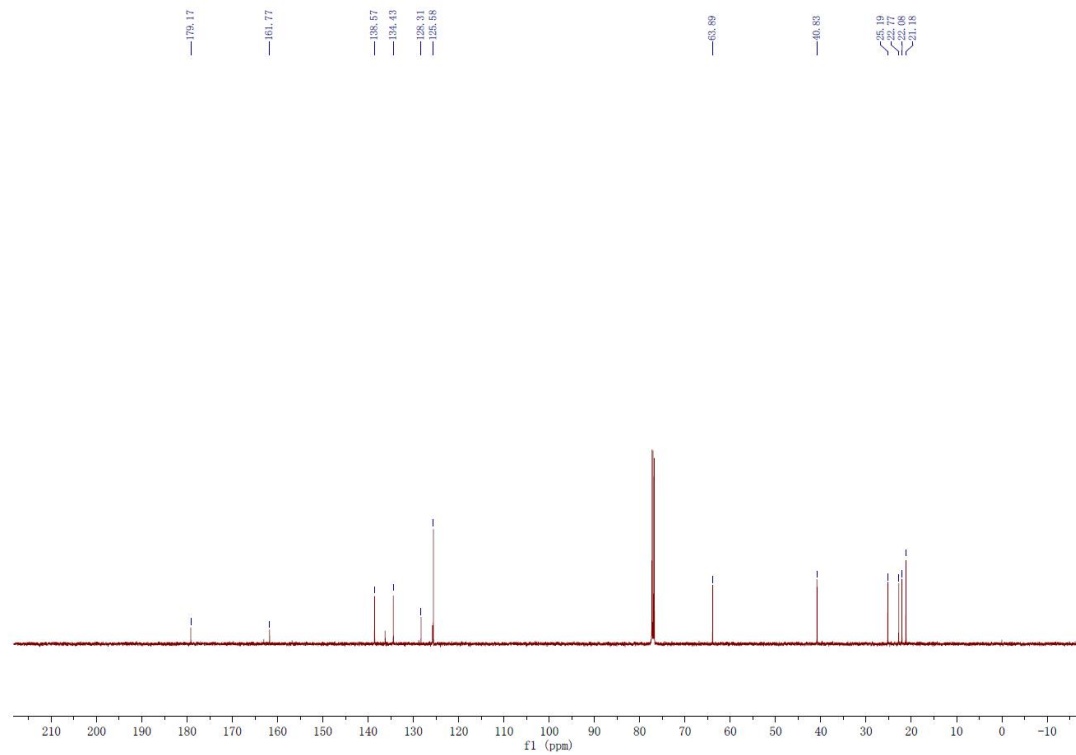

<sup>1</sup>H NMR of **2o**

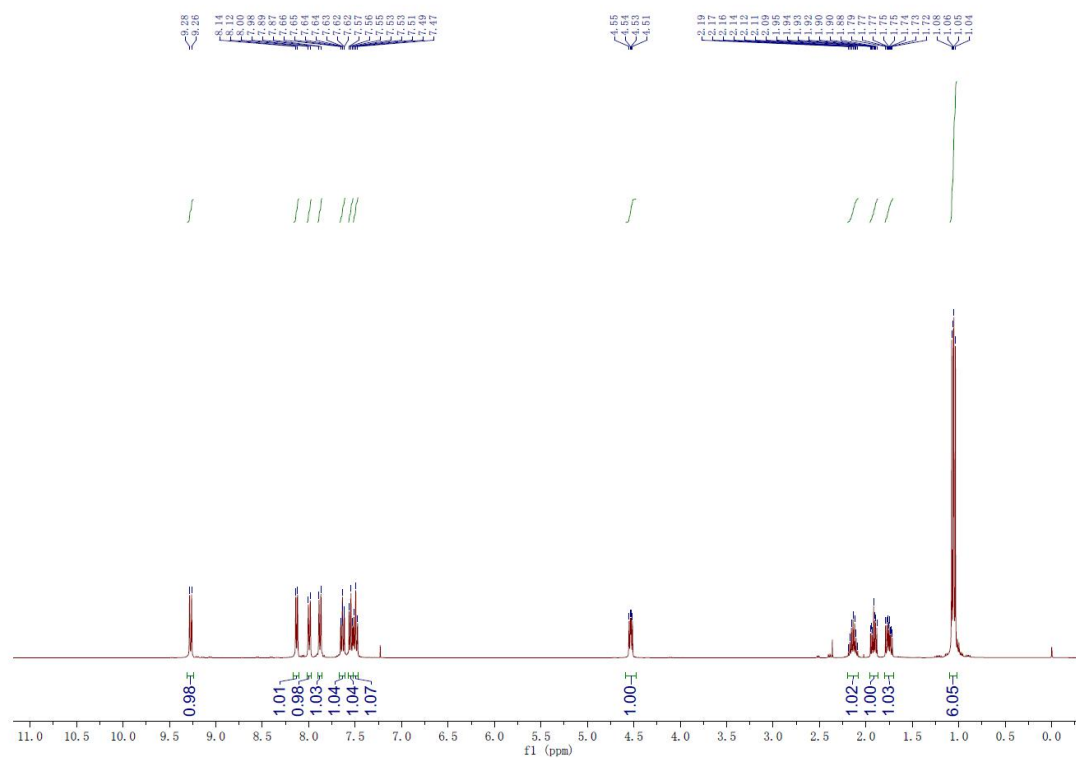

<sup>13</sup>C NMR of **2o**

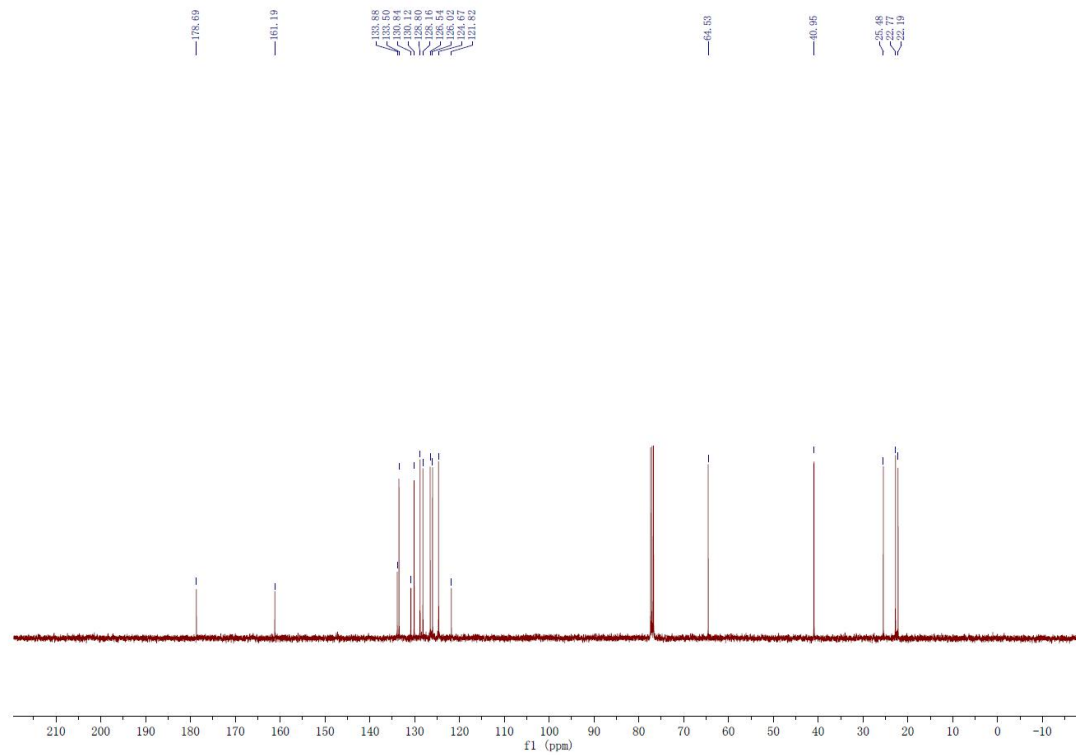

<sup>1</sup>H NMR of **2q**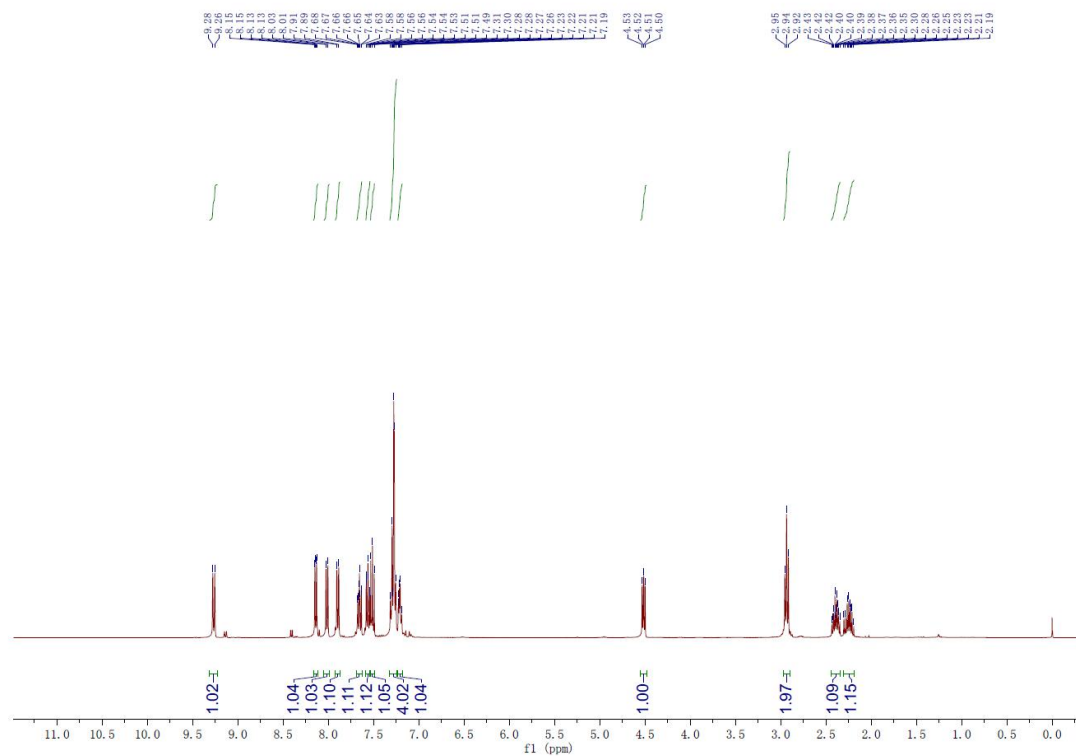 $^{13}\text{C}$  NMR of **2q**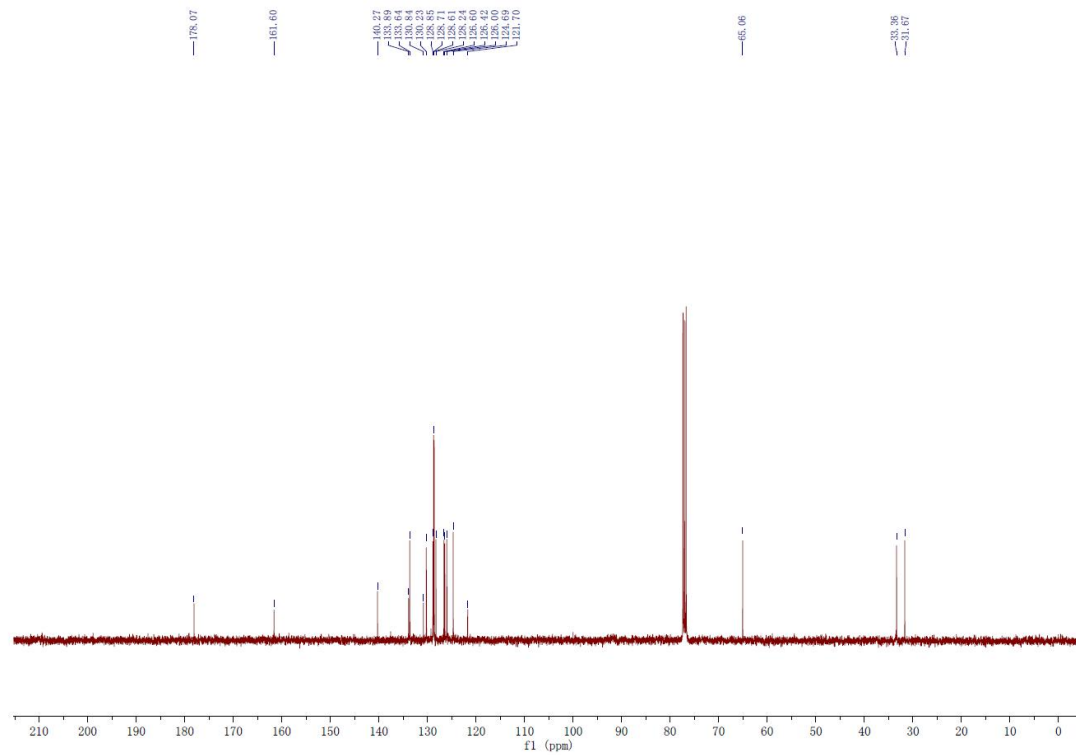

<sup>1</sup>H NMR of **2r**

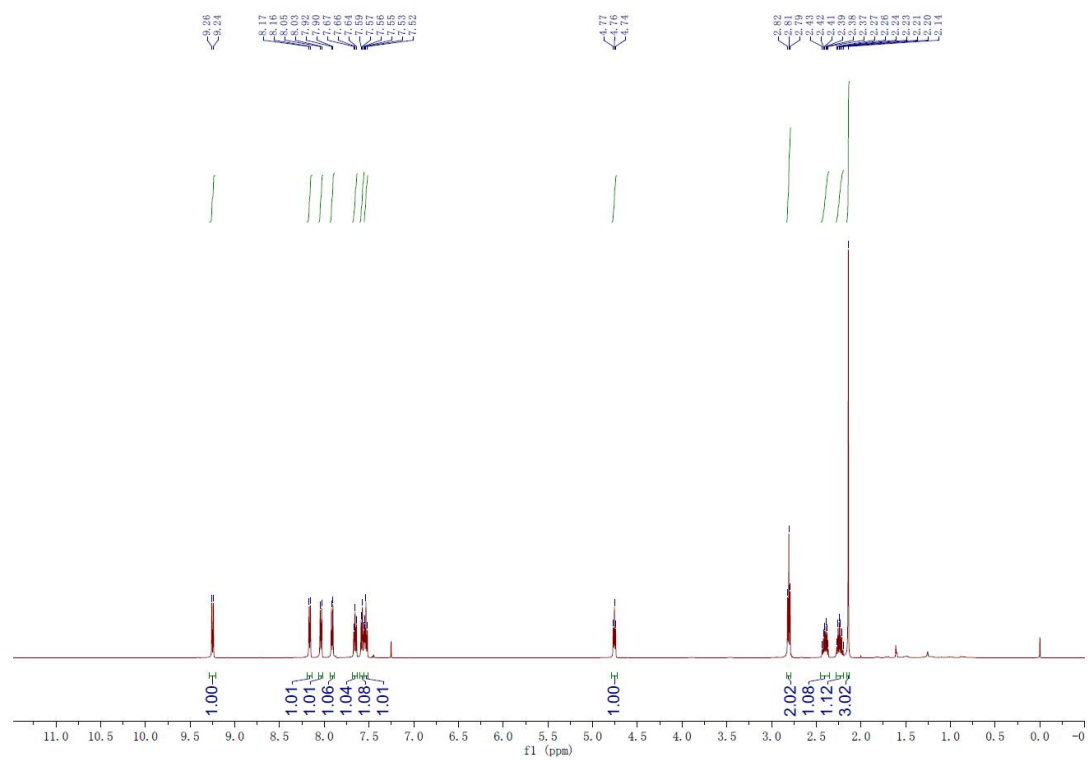

<sup>13</sup>C NMR of **2r**

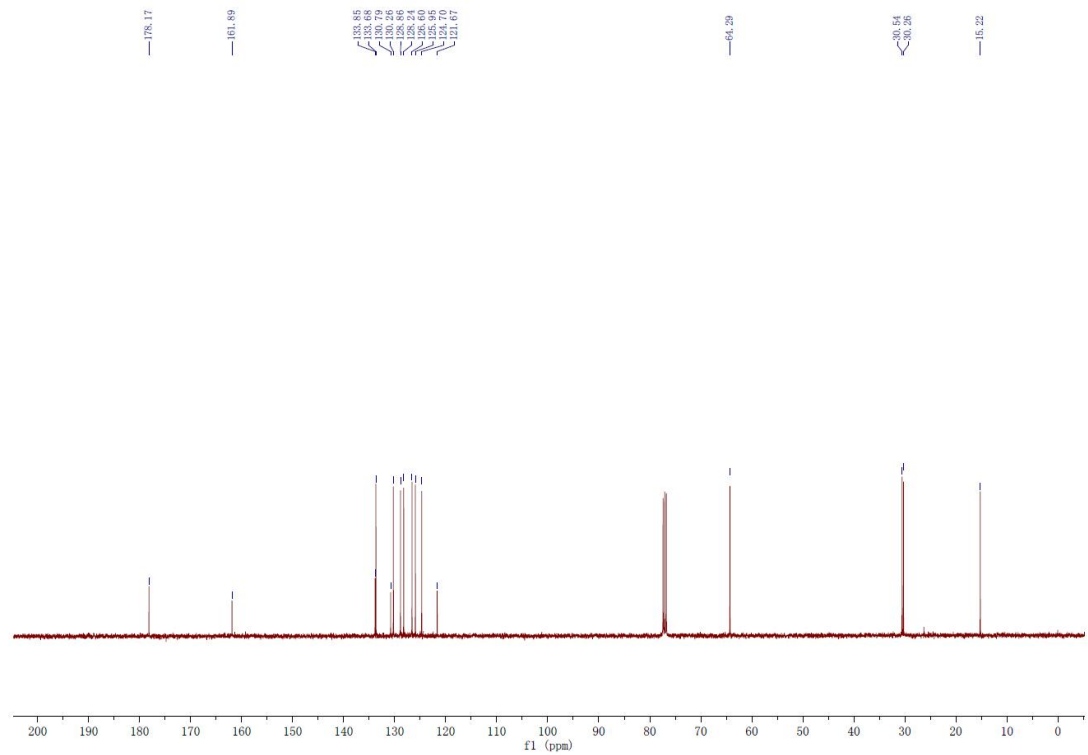



<sup>1</sup>H NMR of **2s**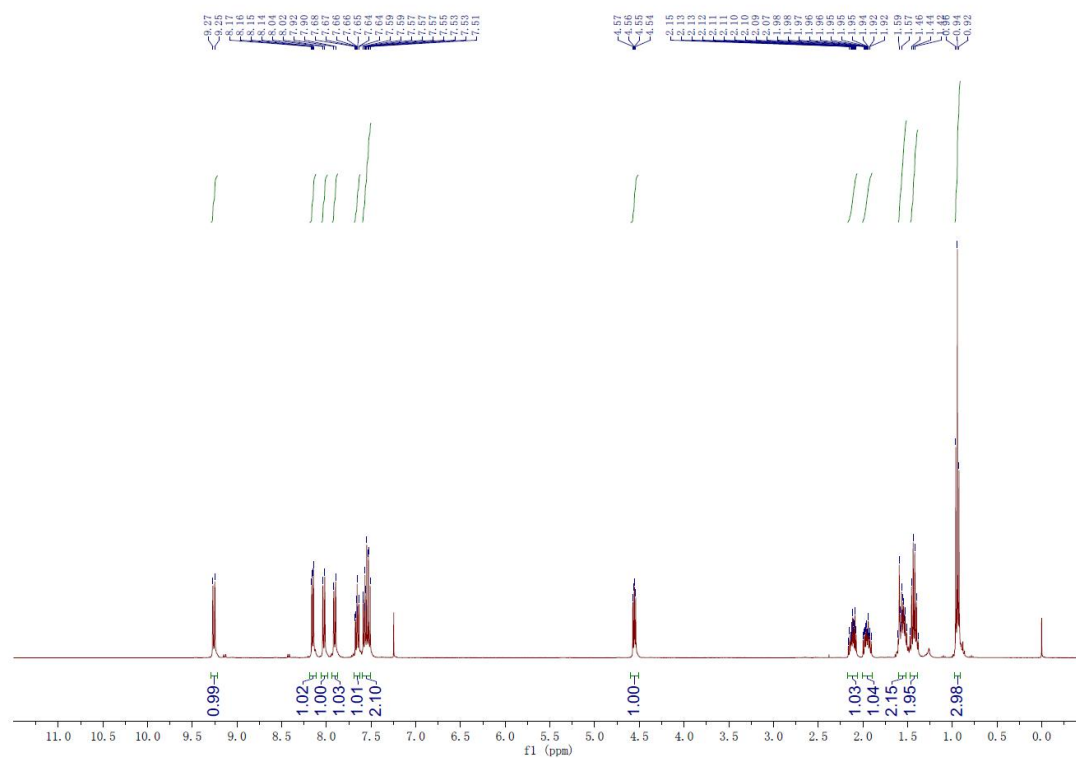<sup>13</sup>C NMR of **2s**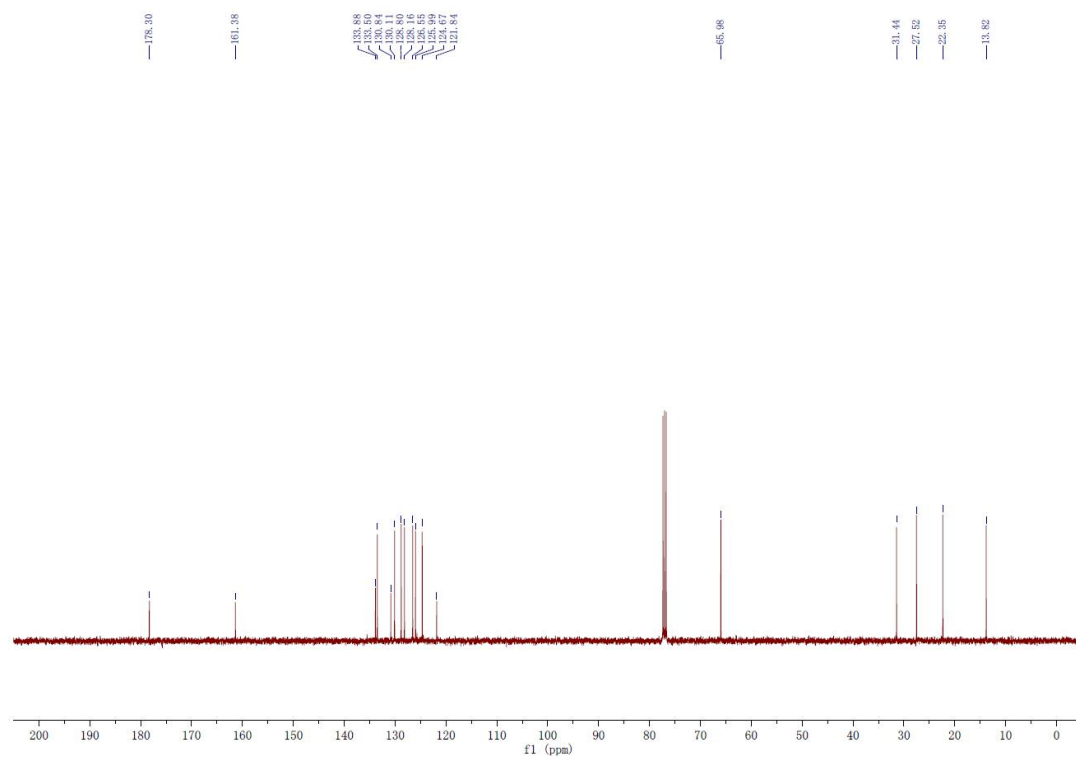

<sup>1</sup>H NMR of **2t**

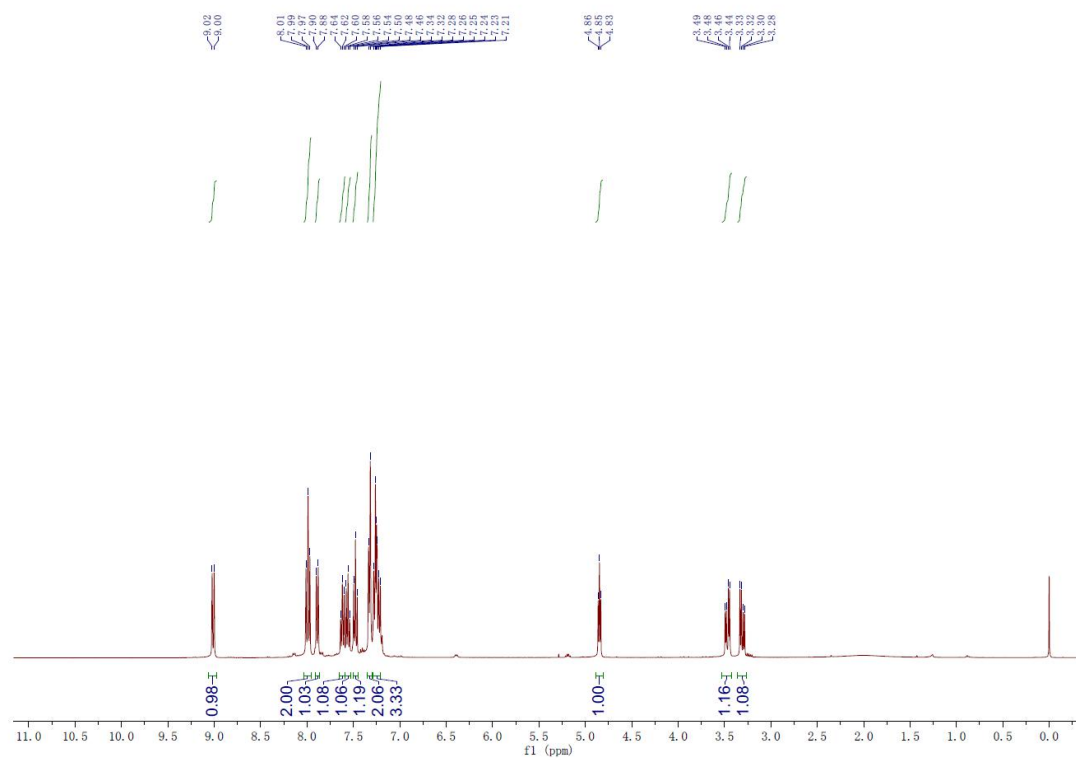

<sup>13</sup>C NMR of **2t**

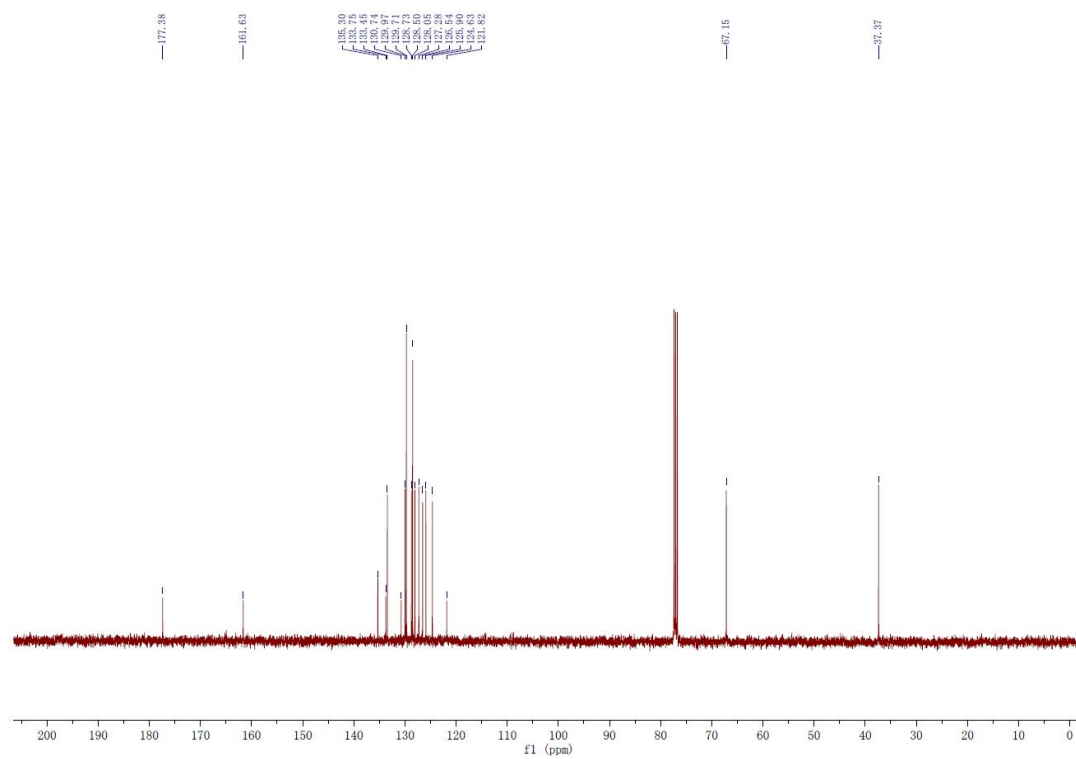

### <sup>1</sup>H NMR of C6

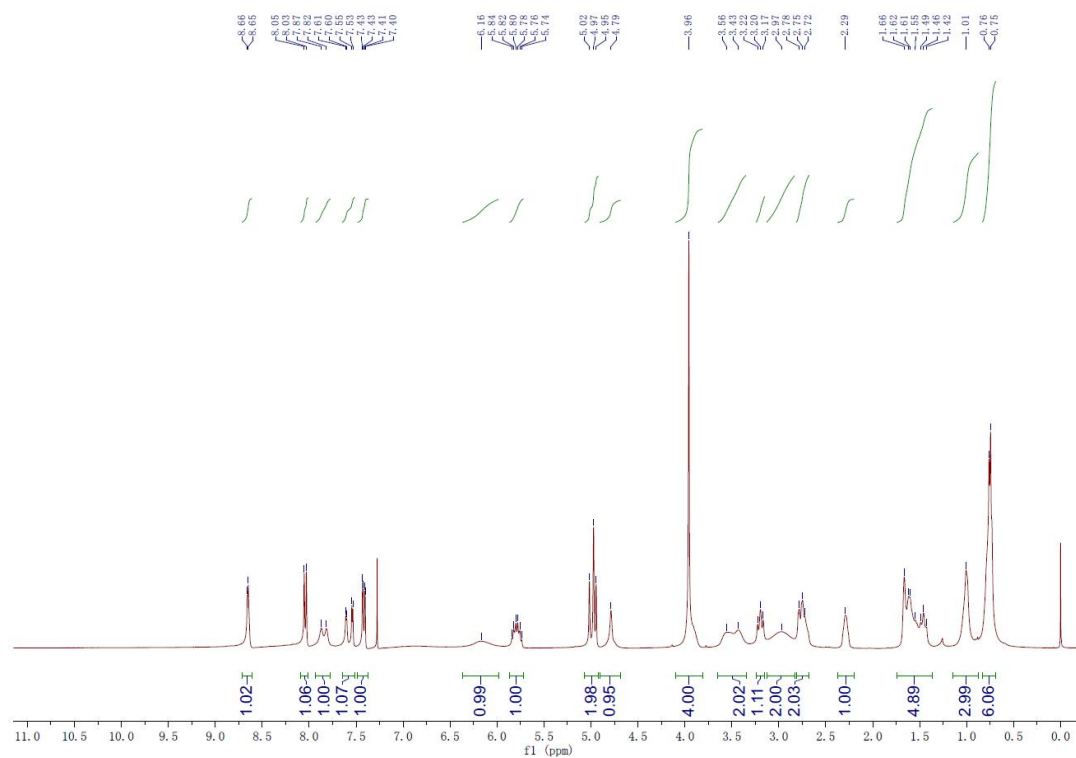<sup>13</sup>C NMR of C6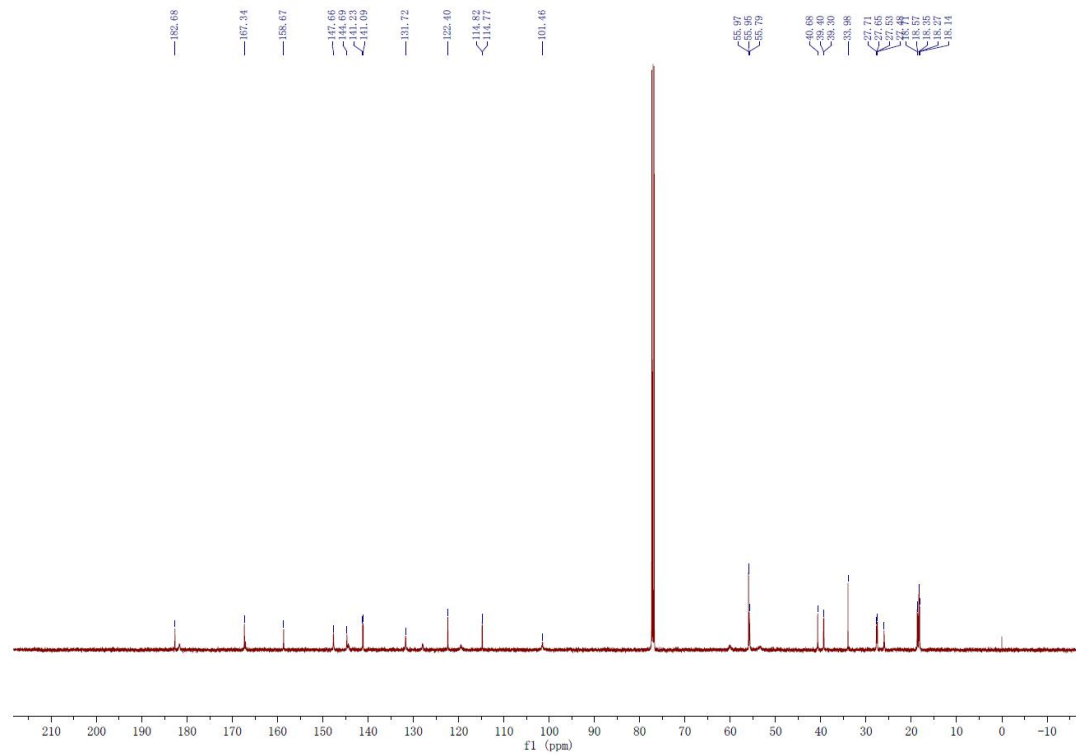

<sup>1</sup>H NMR of C8

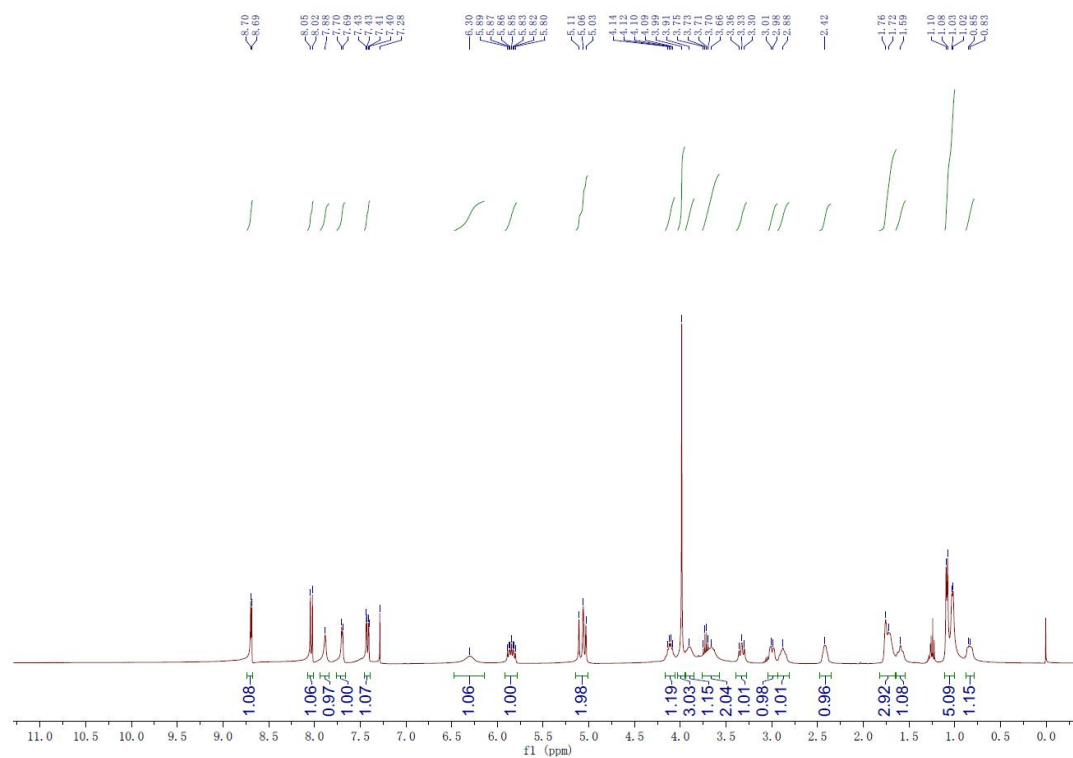

<sup>13</sup>C NMR of C8

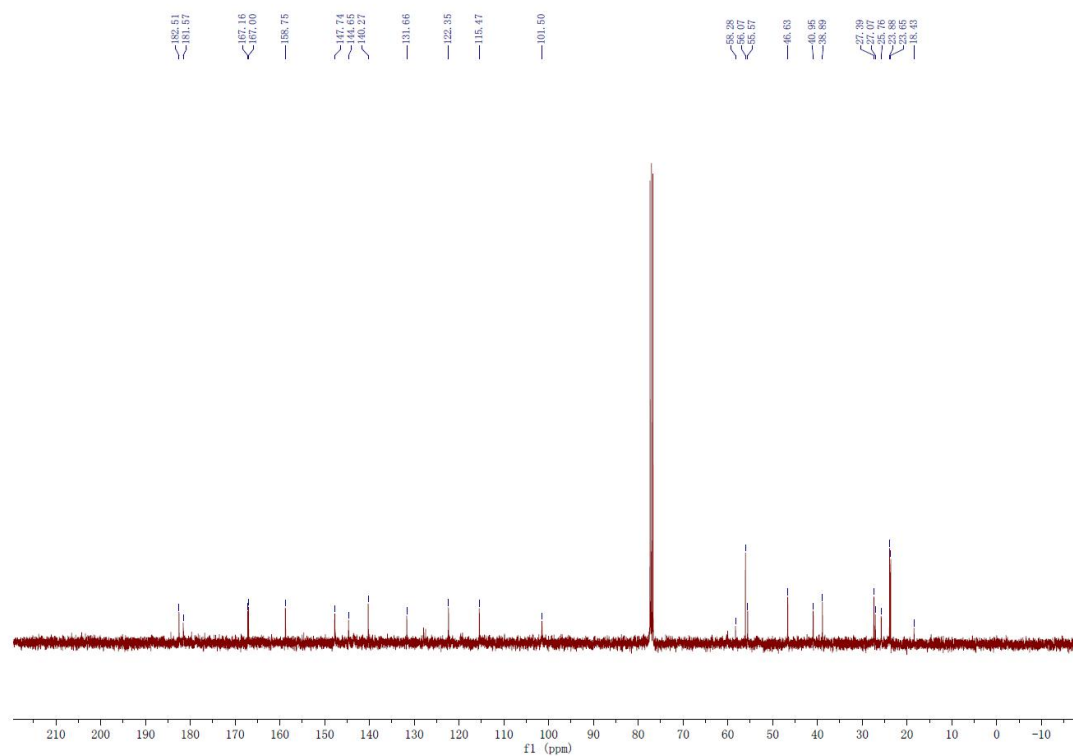

<sup>1</sup>H NMR of C9

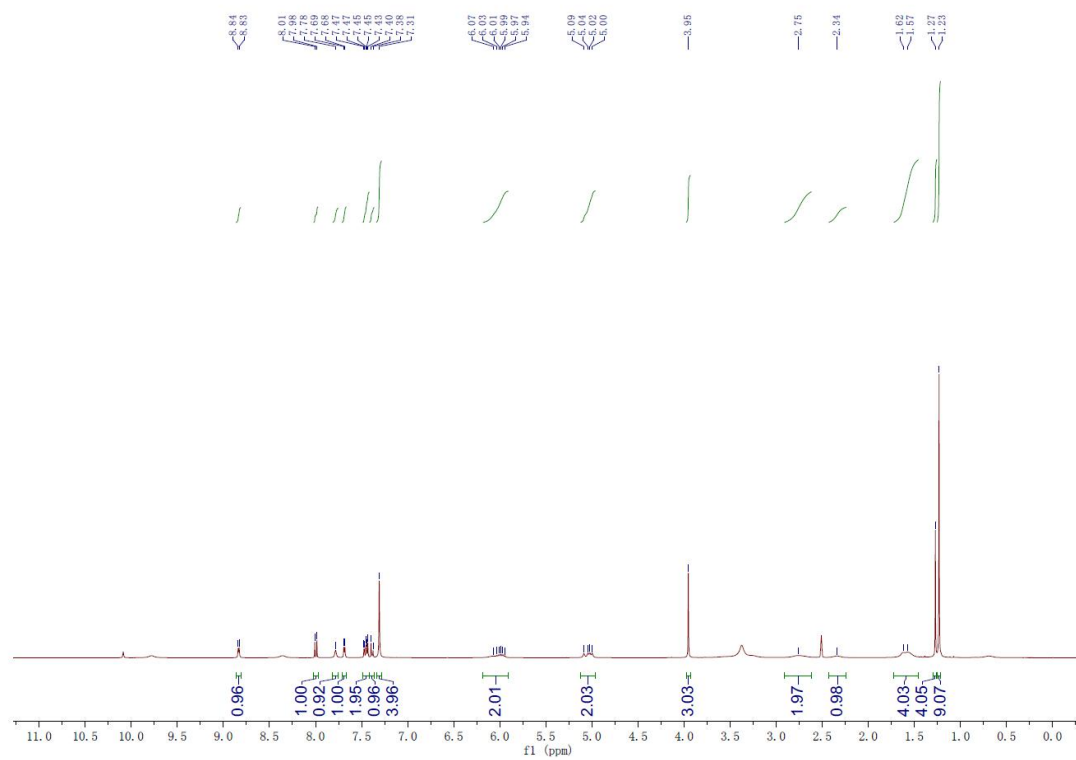

<sup>13</sup>C NMR of C9

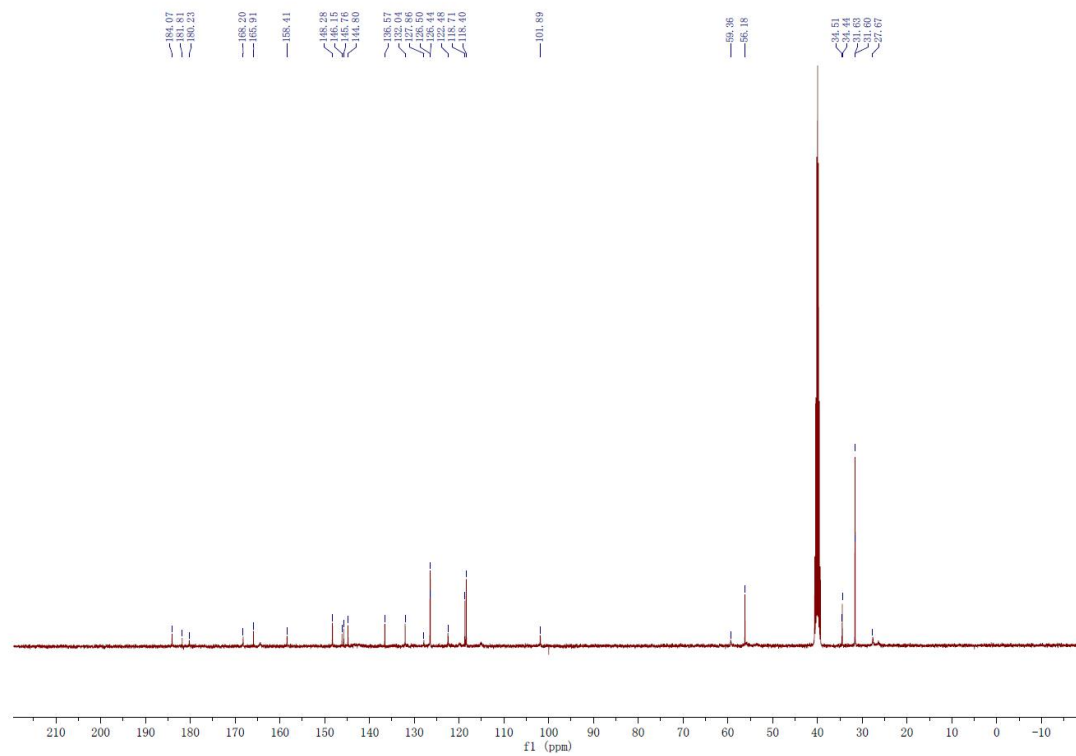

# <sup>1</sup>H NMR of C10

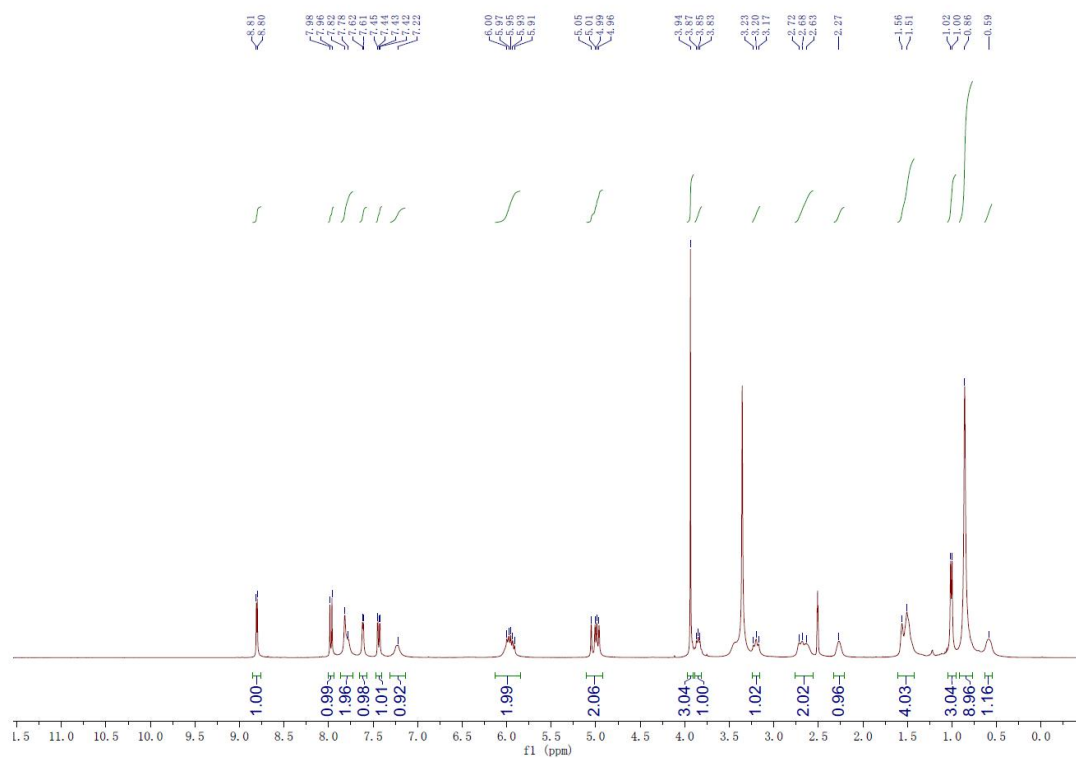

# <sup>13</sup>C NMR of C10

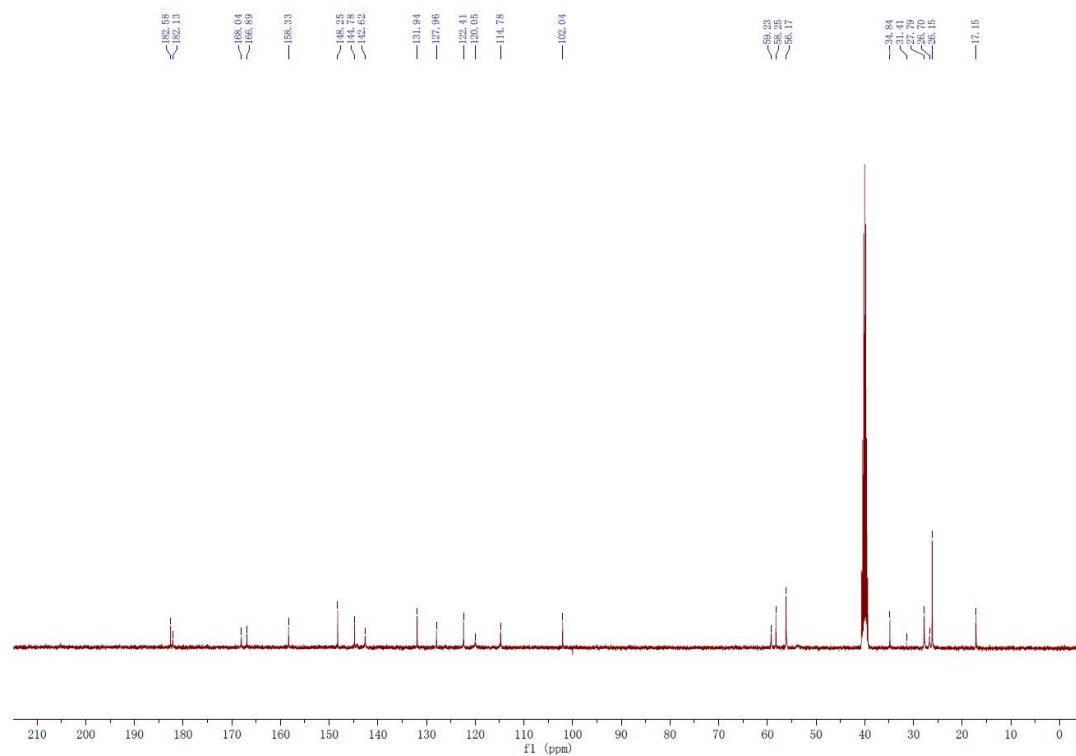

<sup>1</sup>H NMR of **C11**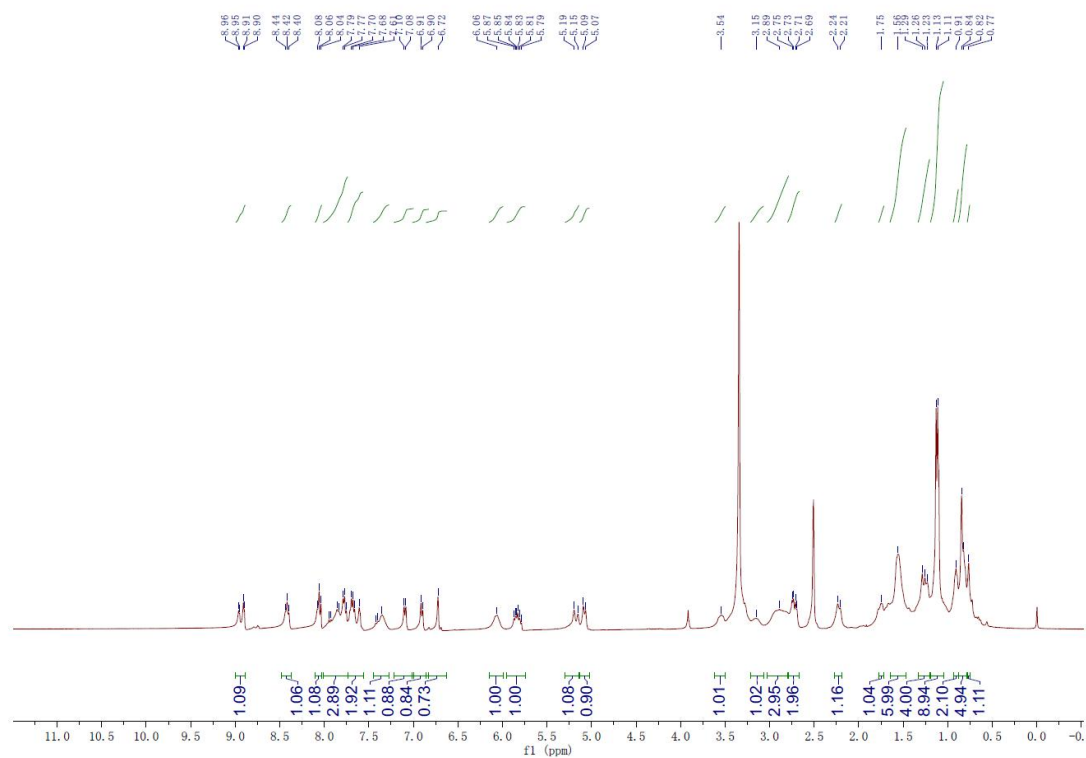 $^{13}\text{C}$  NMR of **C10**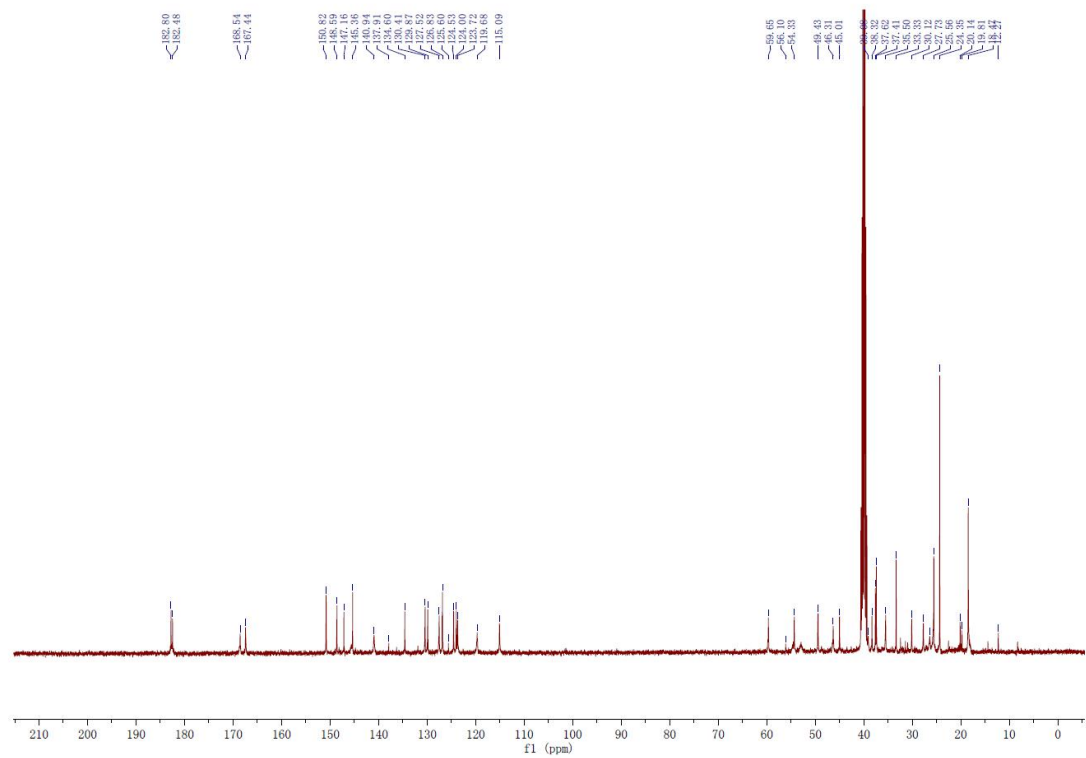

<sup>1</sup>H NMR of **3a**

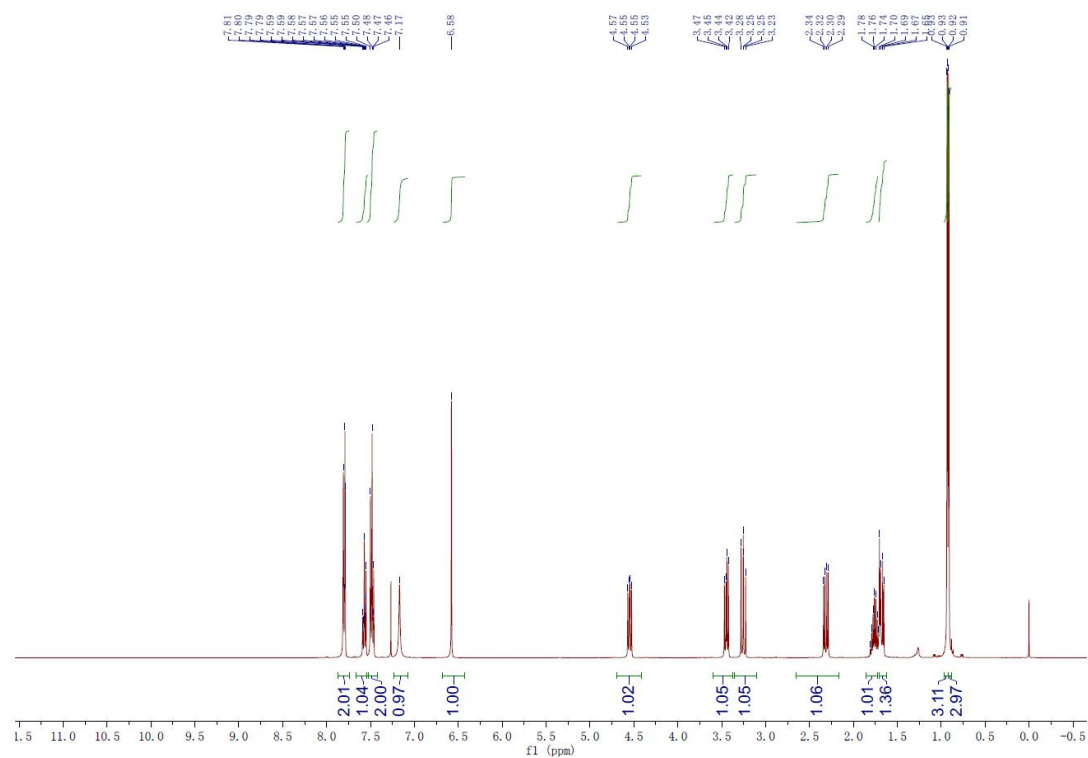

<sup>13</sup>C NMR of **3a**

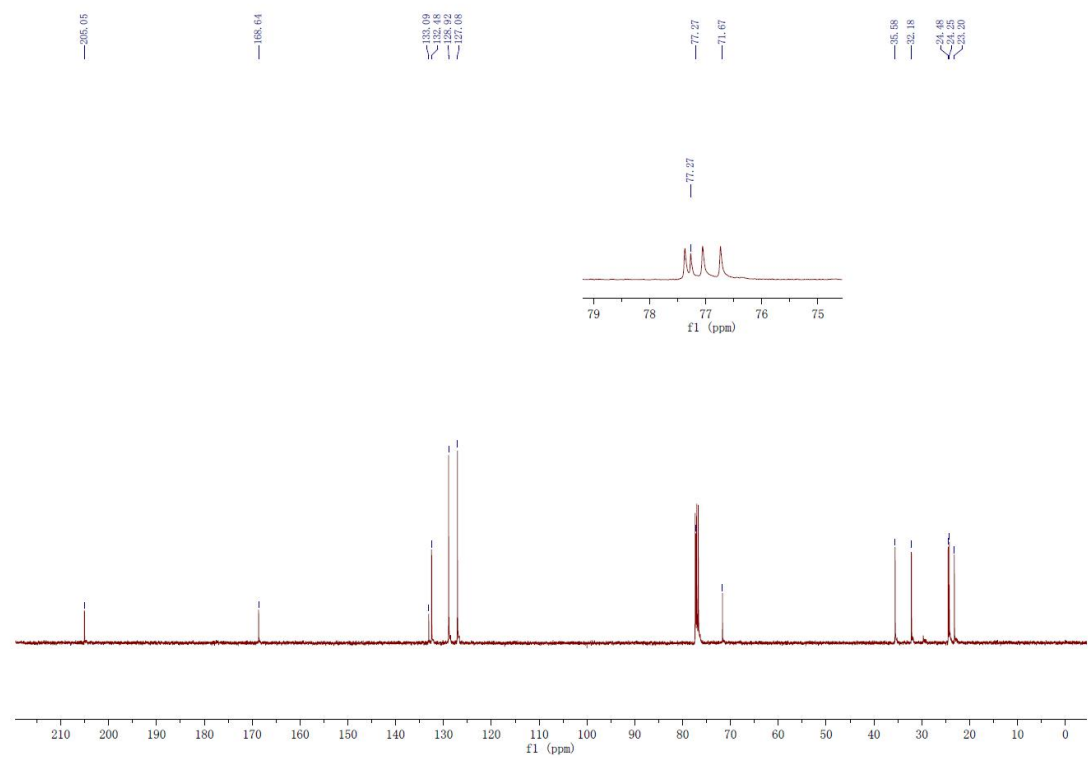



<sup>1</sup>H NMR of **3b**

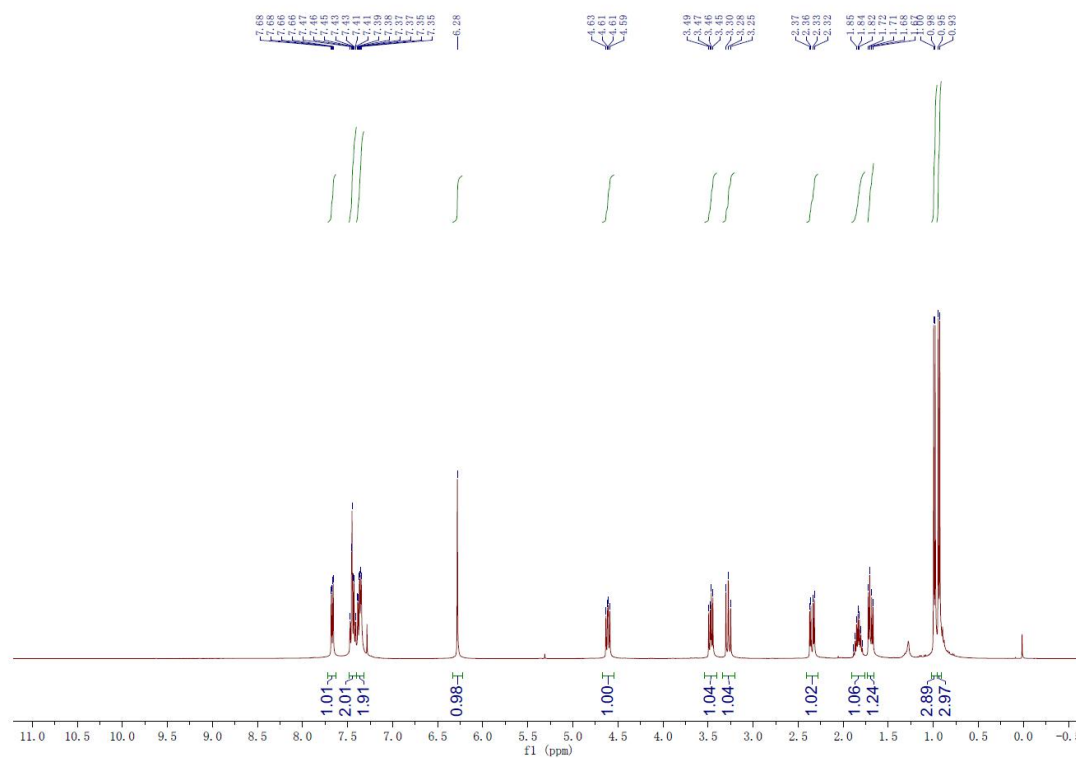

<sup>13</sup>C NMR of **3b**

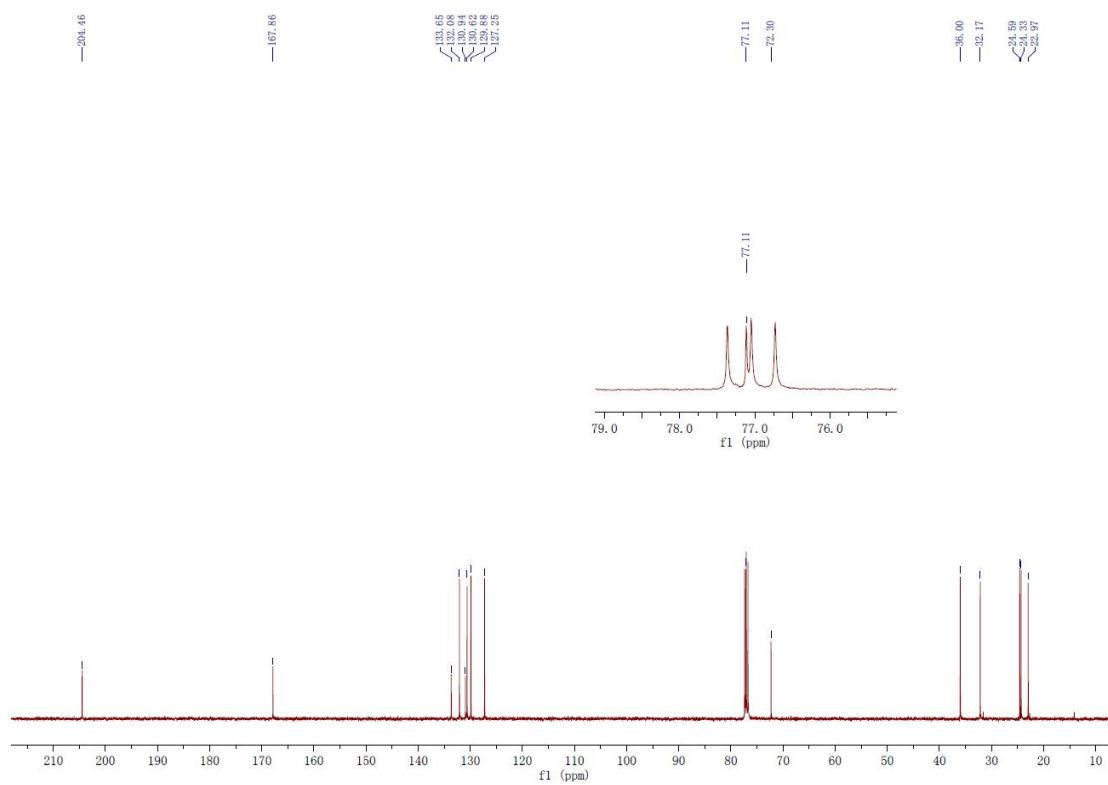

<sup>1</sup>H NMR of **3c**

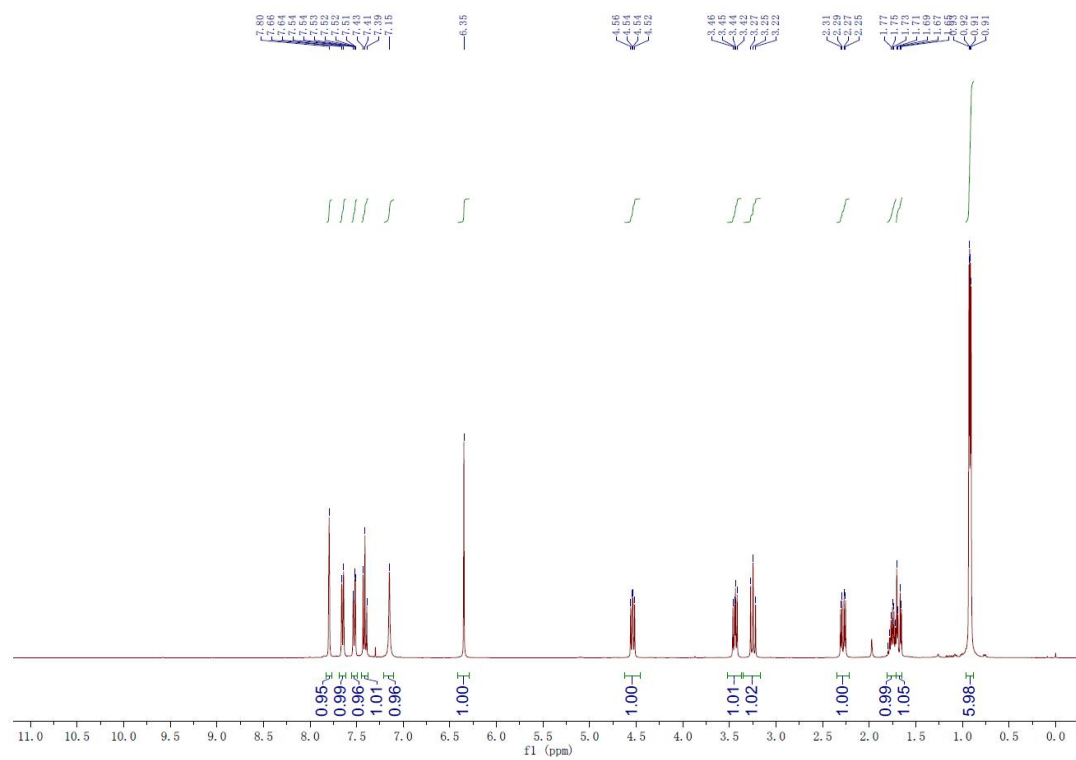

<sup>13</sup>C NMR of **3c**

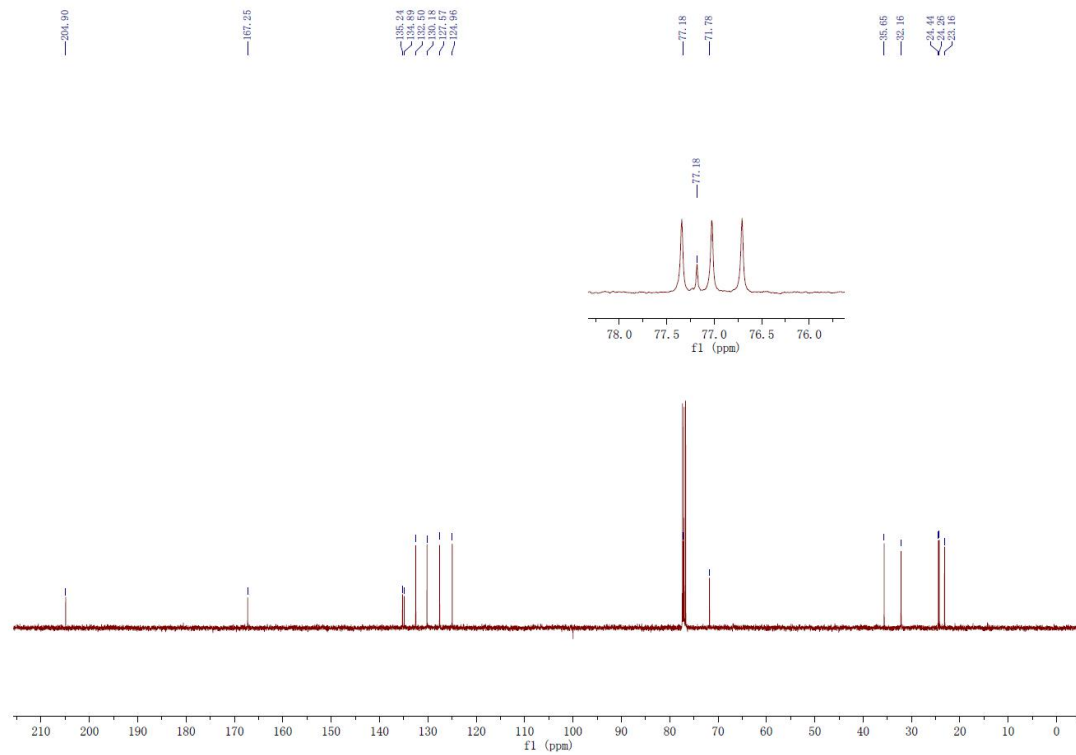

<sup>1</sup>H NMR of **3d**

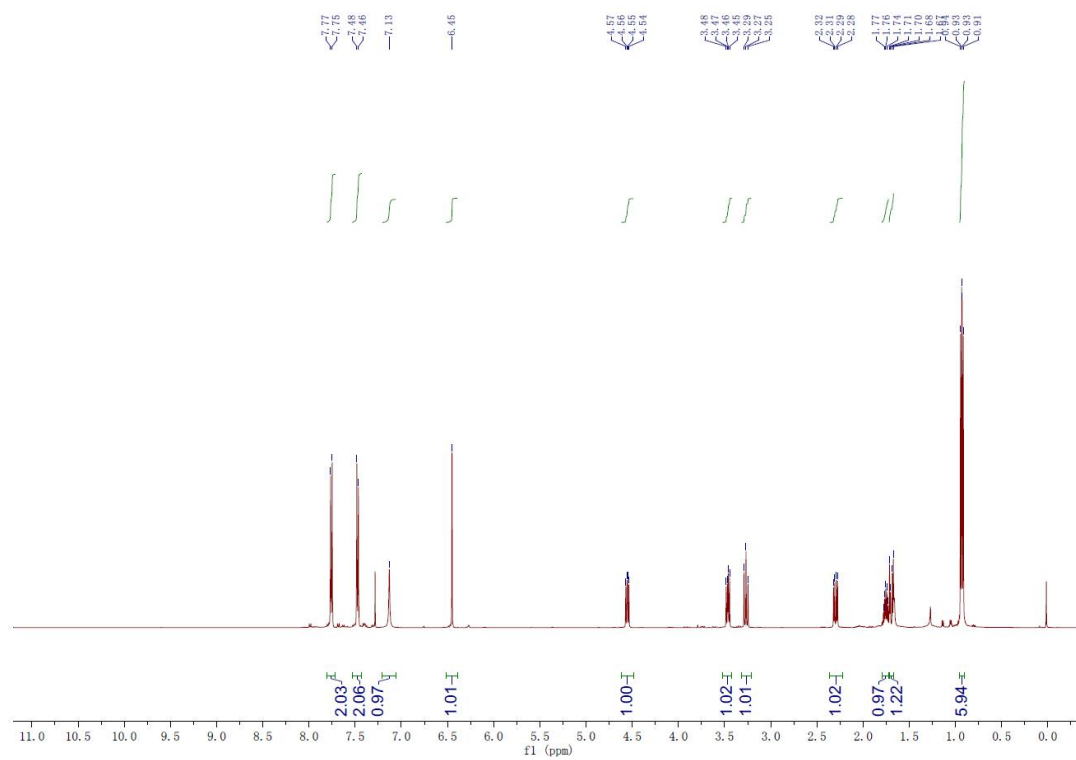

<sup>13</sup>C NMR of **3d**

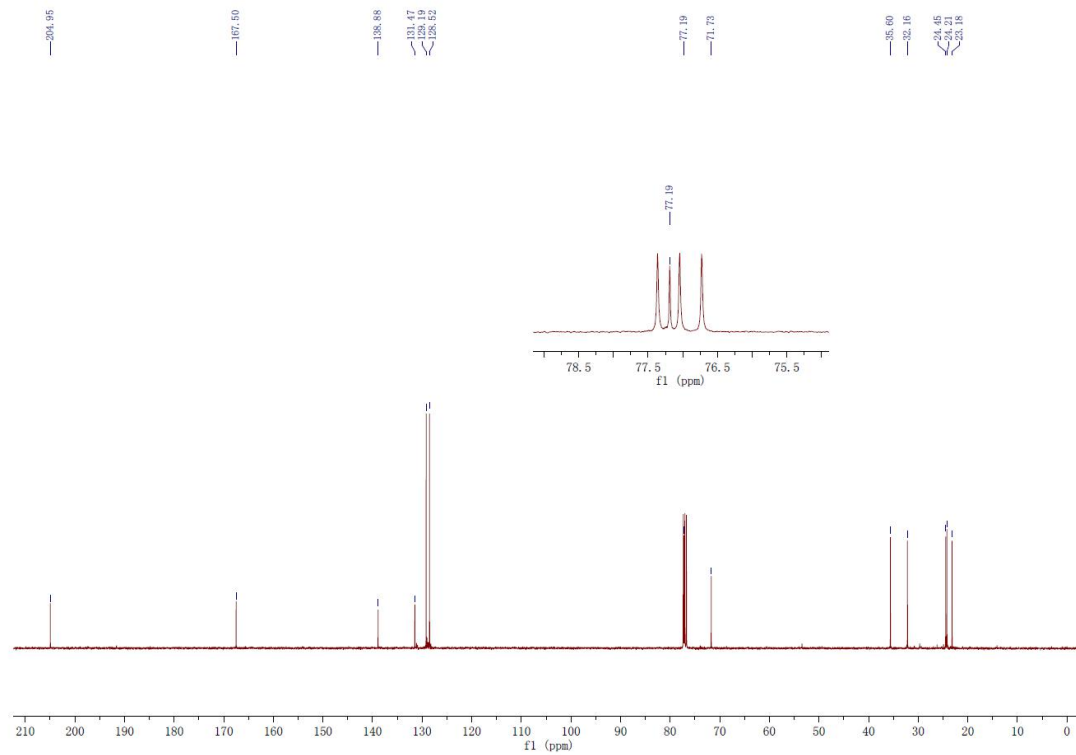

<sup>1</sup>H NMR of **3e**

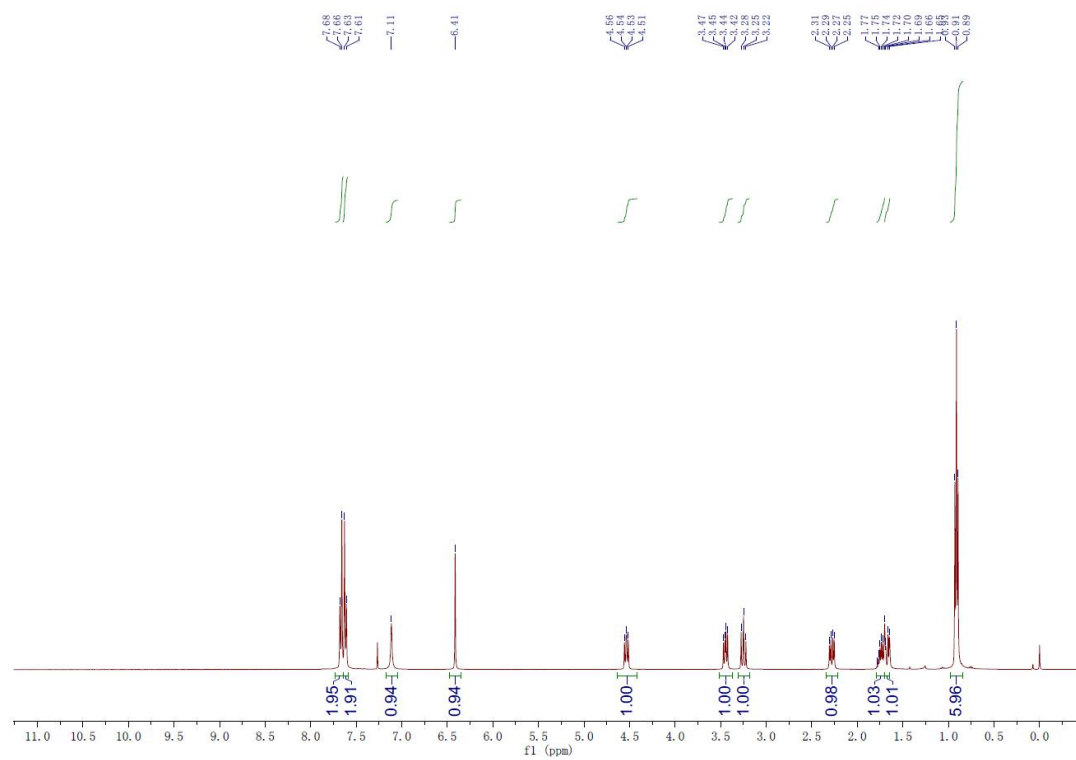

<sup>13</sup>C NMR of **3e**

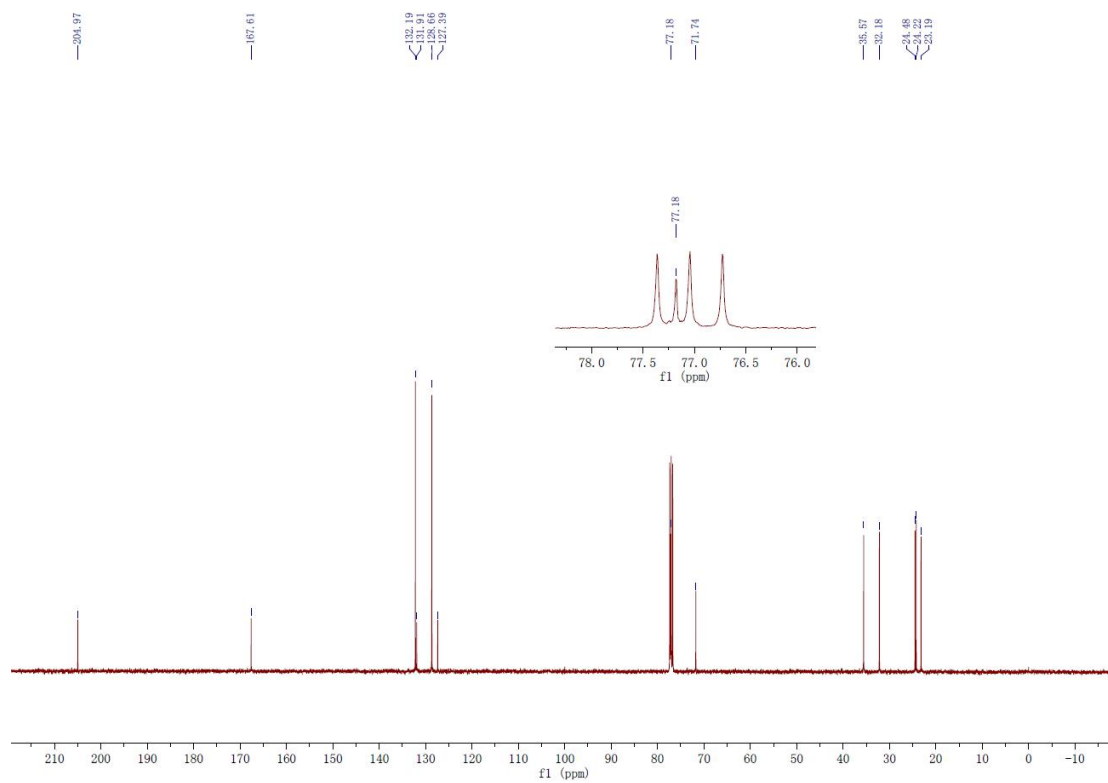

<sup>1</sup>H NMR of **3f**

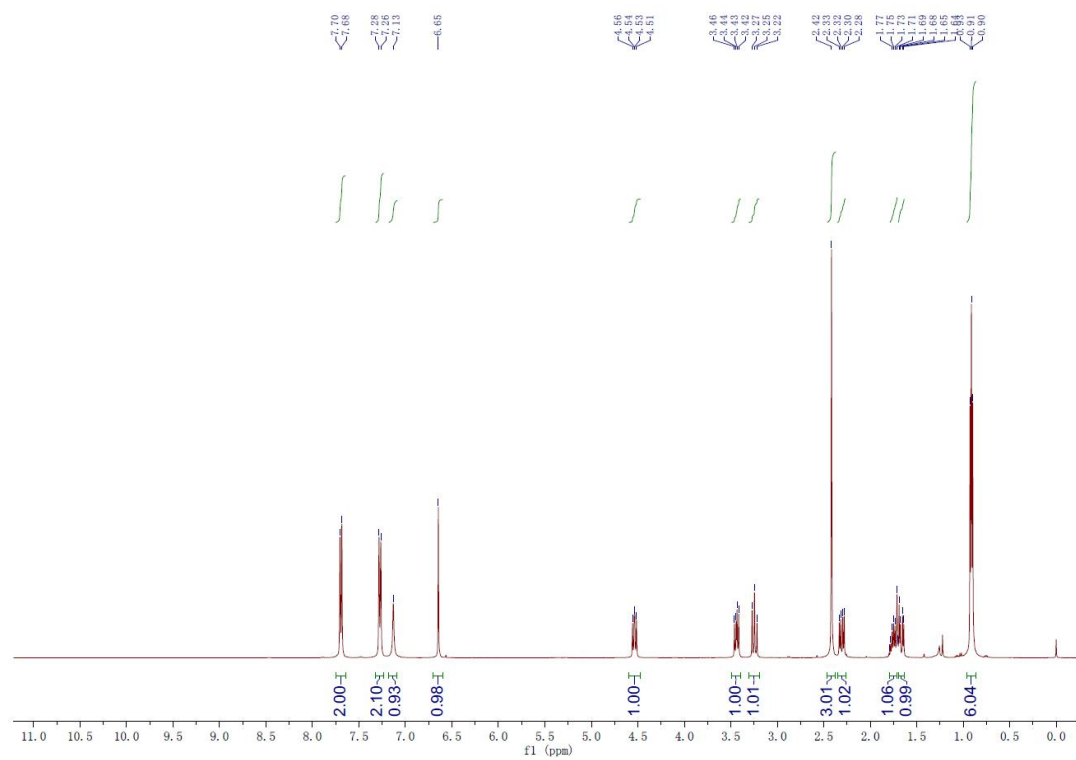

<sup>13</sup>C NMR of **3f**

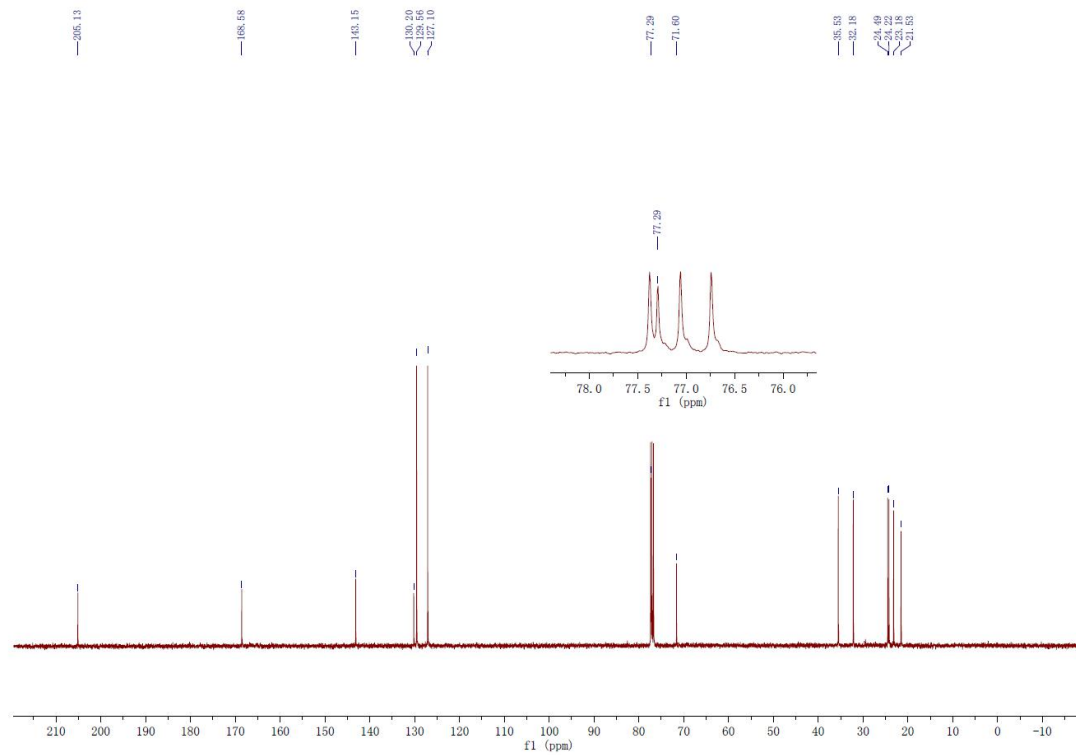

<sup>1</sup>H NMR of **3g**

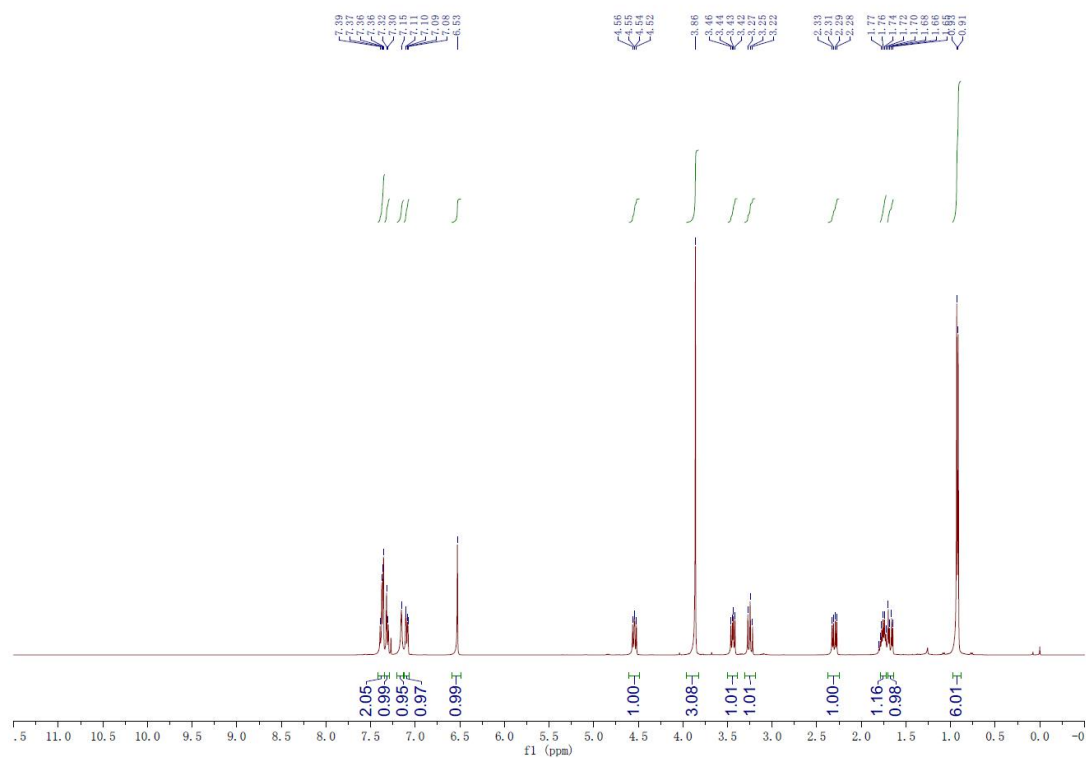

<sup>13</sup>C NMR of **3g**

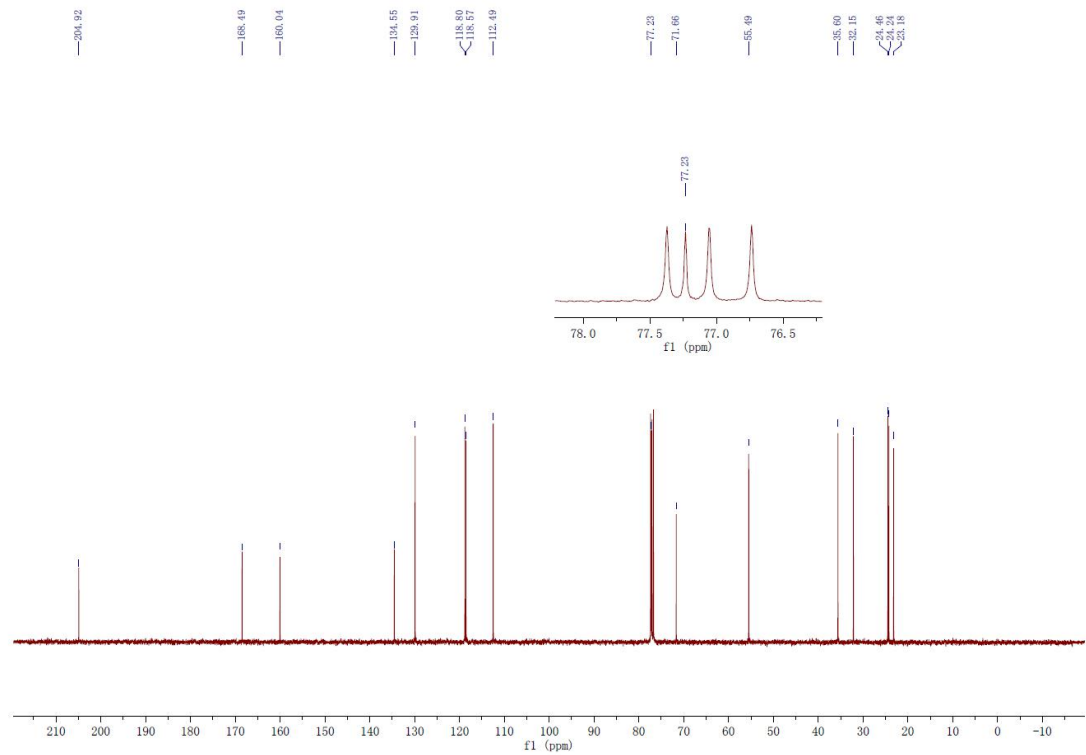

<sup>1</sup>H NMR of **3h**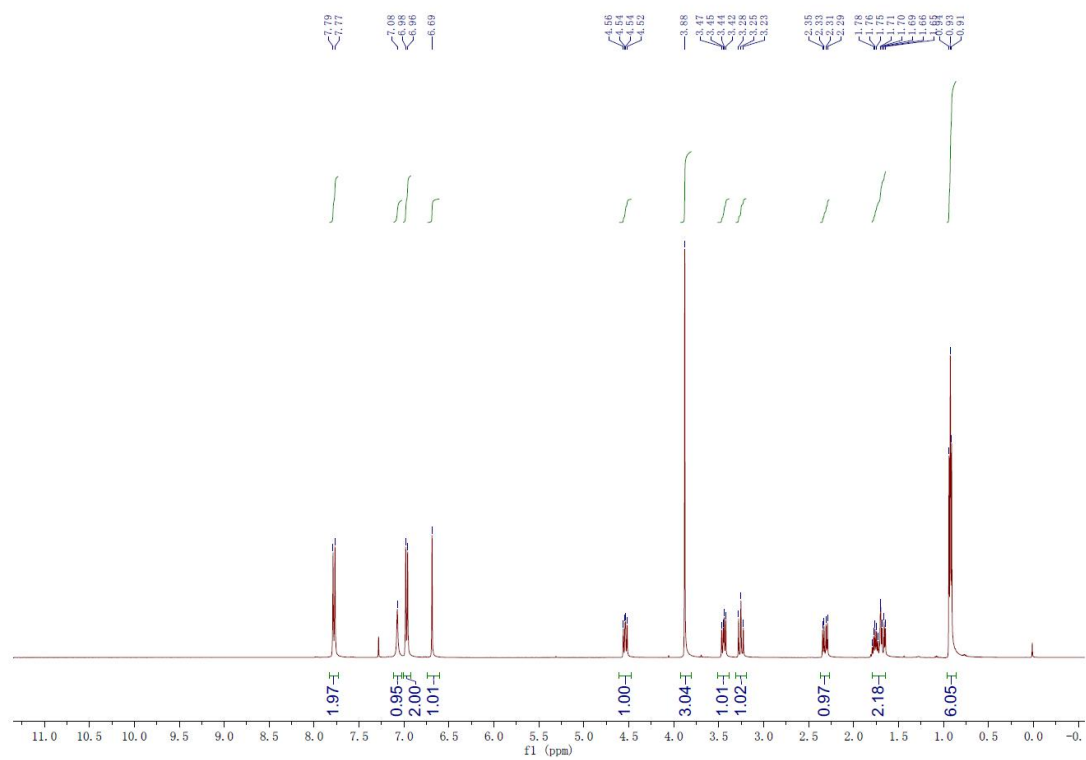<sup>13</sup>C NMR of **3h**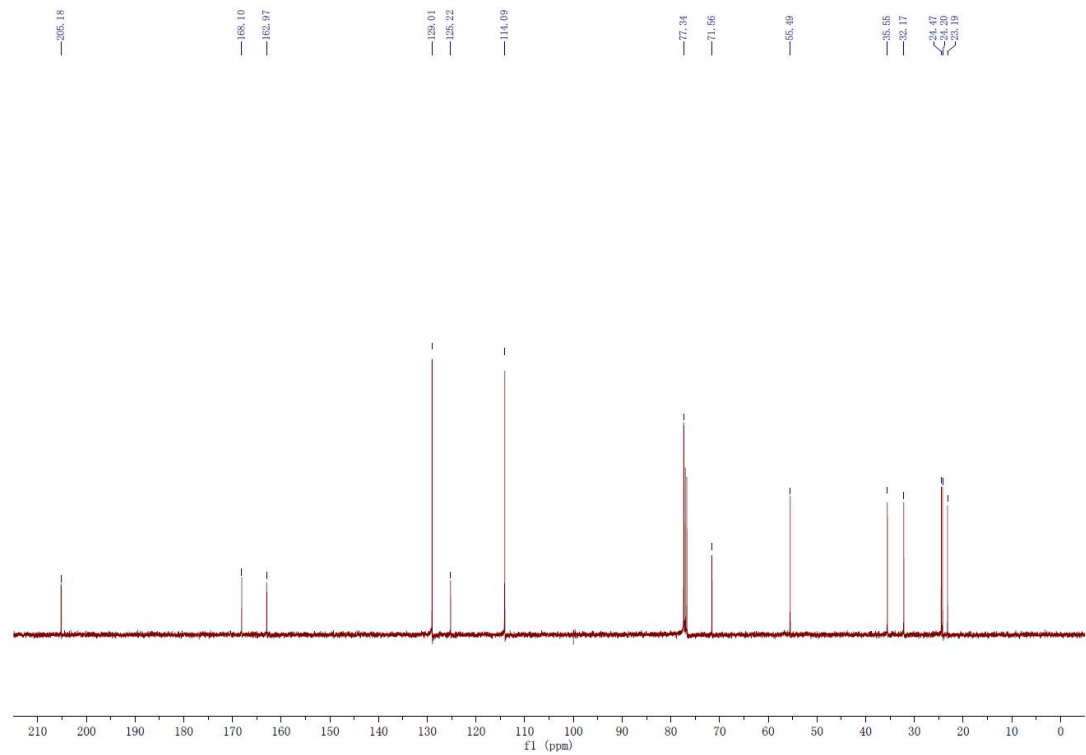

<sup>1</sup>H NMR of **3i**

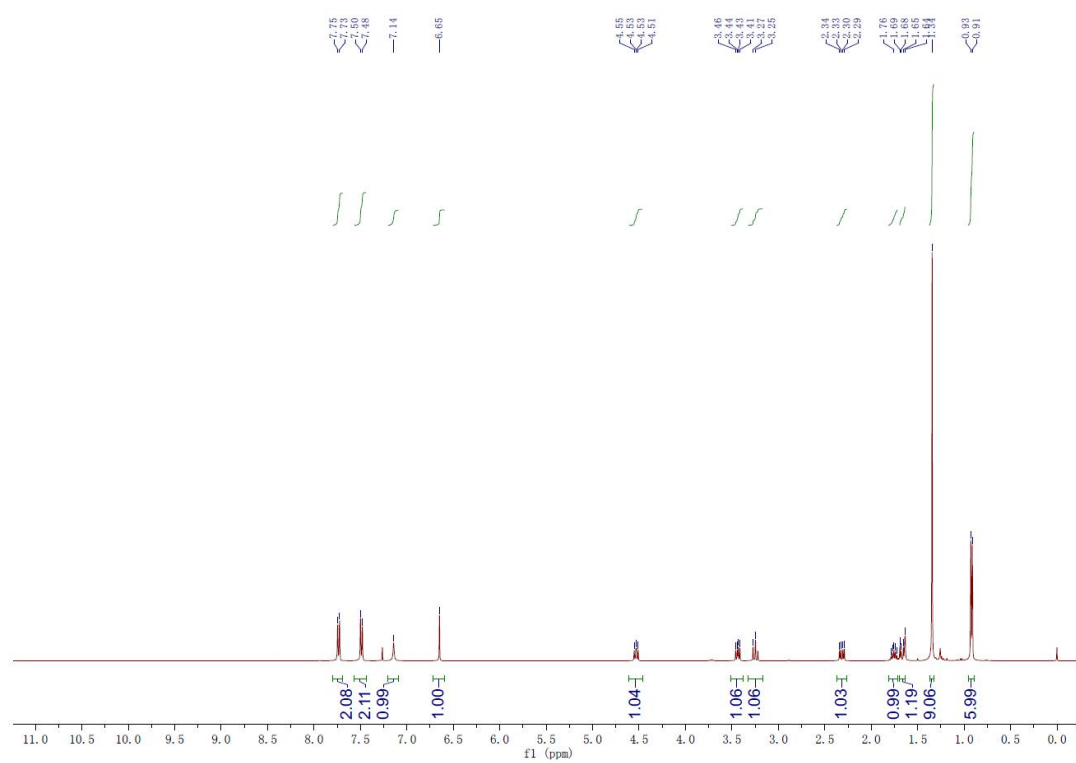

<sup>13</sup>C NMR of **3i**

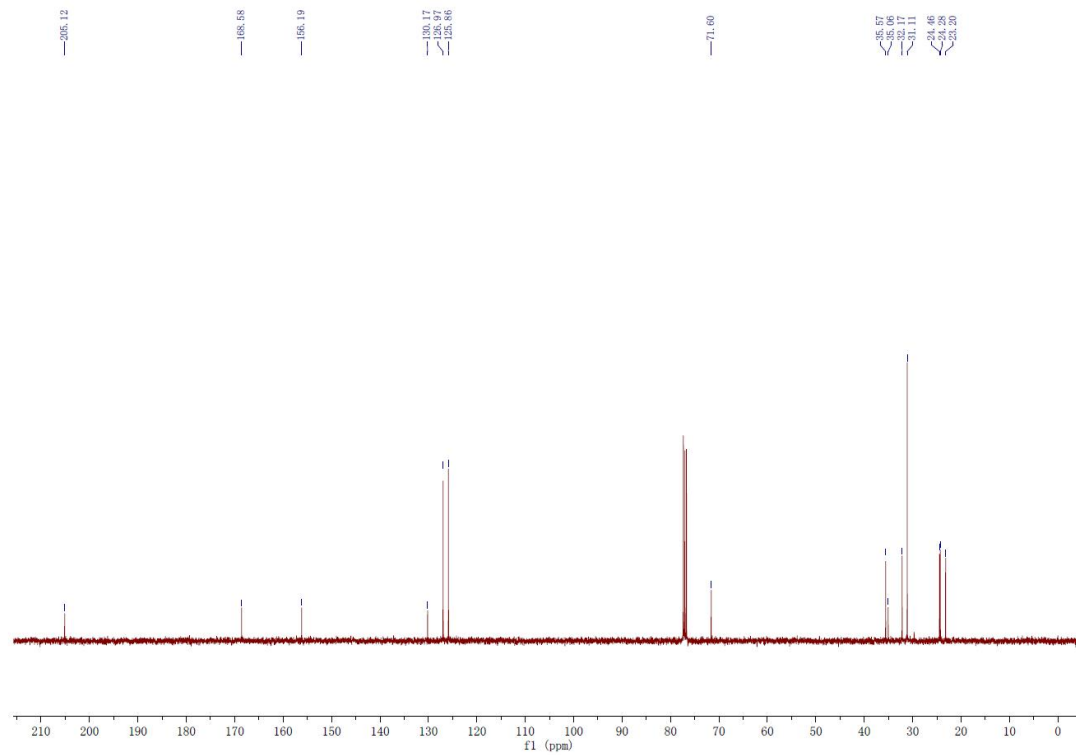



<sup>1</sup>H NMR of **3j**

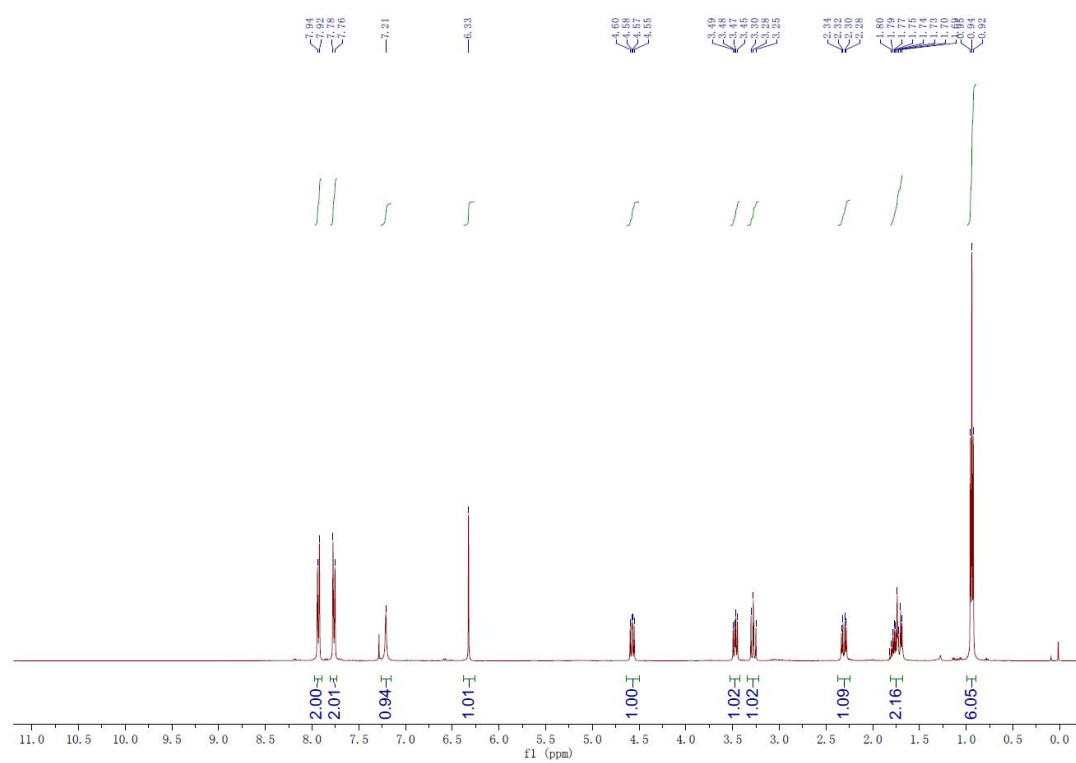

<sup>19</sup>F NMR of **3j**

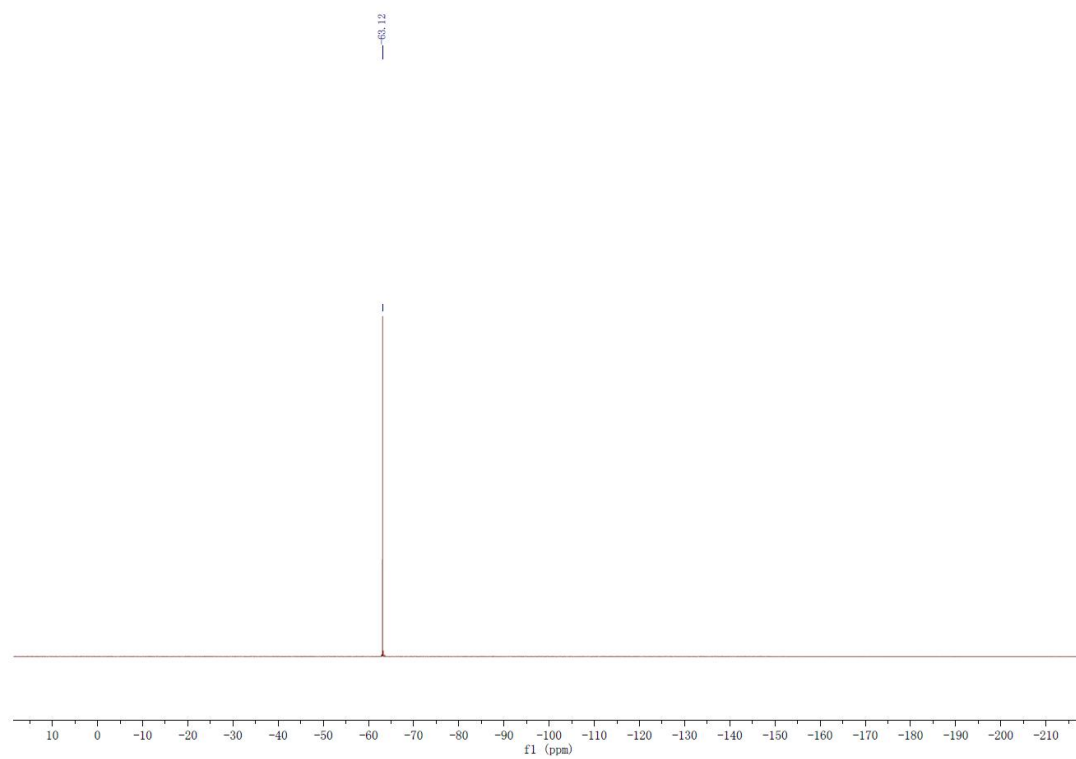

<sup>13</sup>C NMR of **3j**

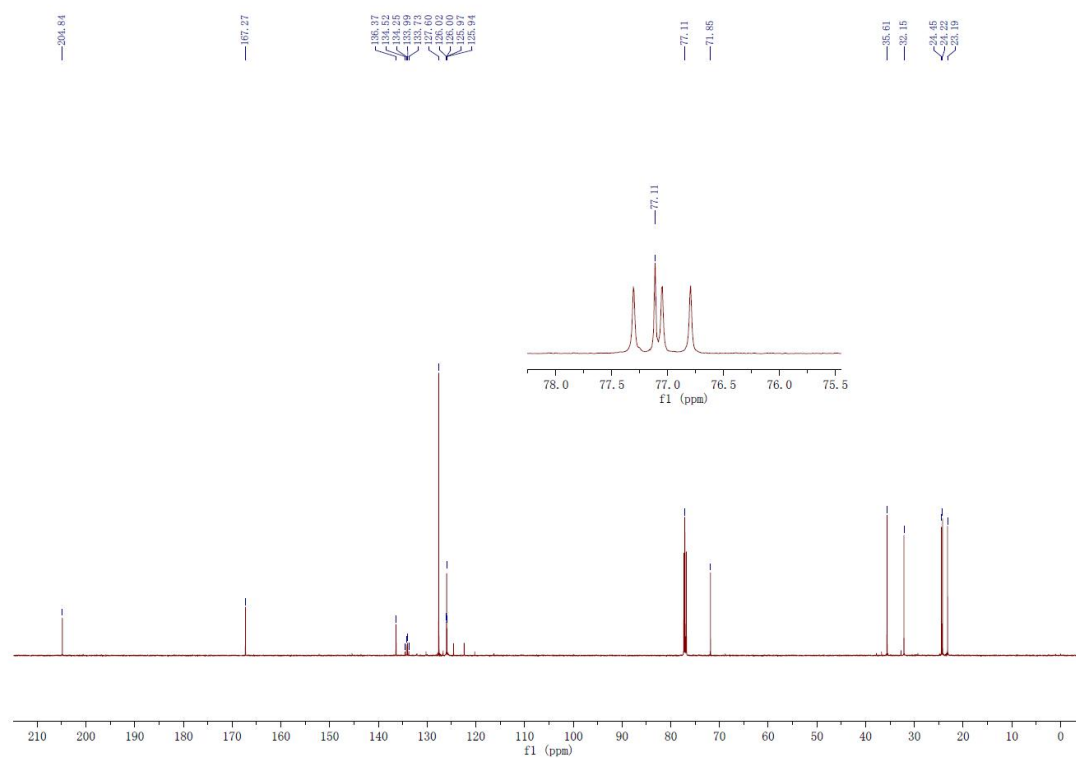

<sup>1</sup>H NMR of **3k**

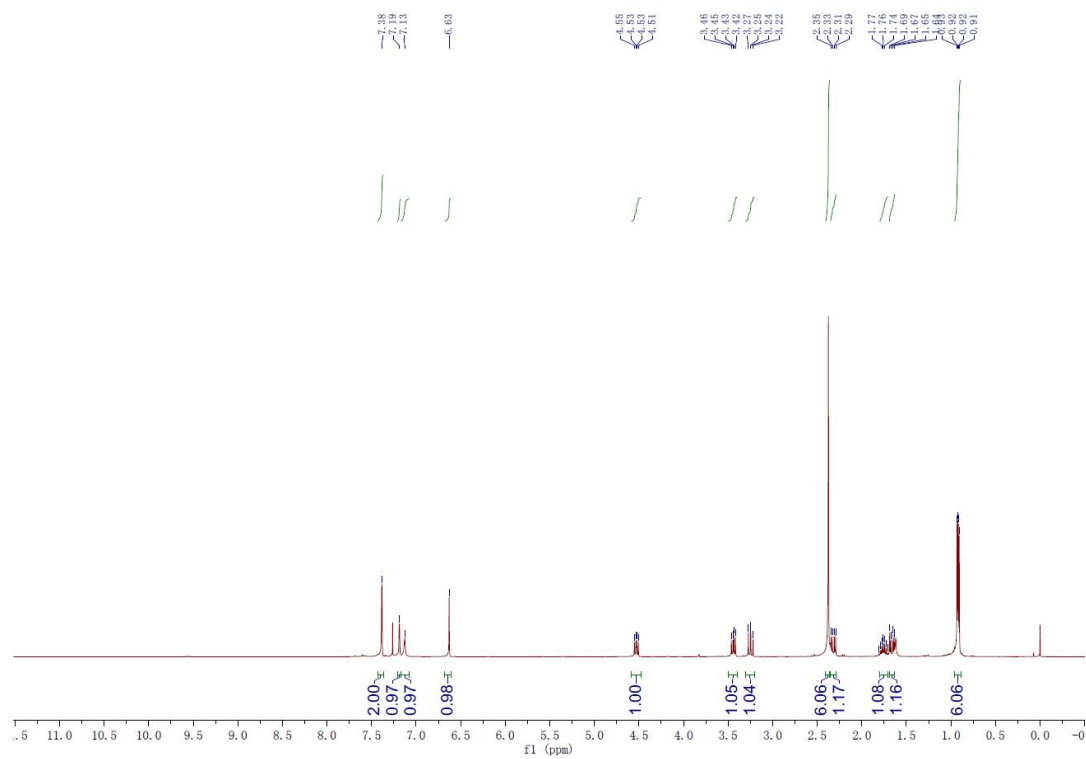

<sup>13</sup>C NMR of **3k**

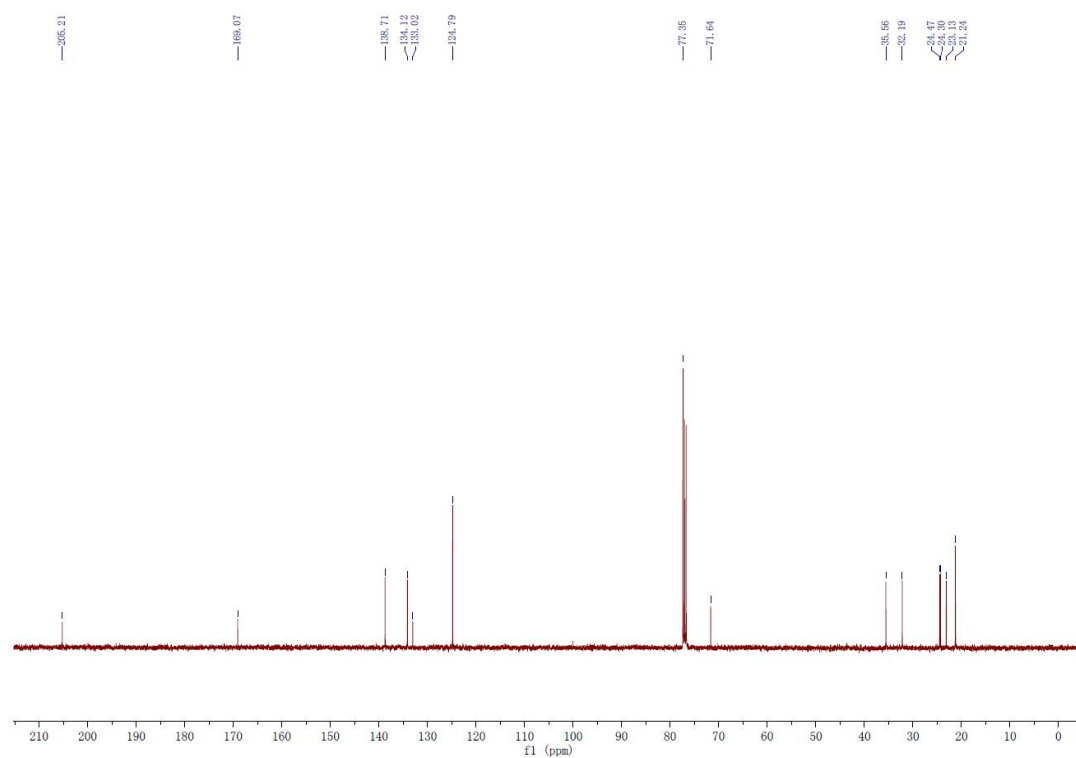

<sup>1</sup>H NMR of **3l**

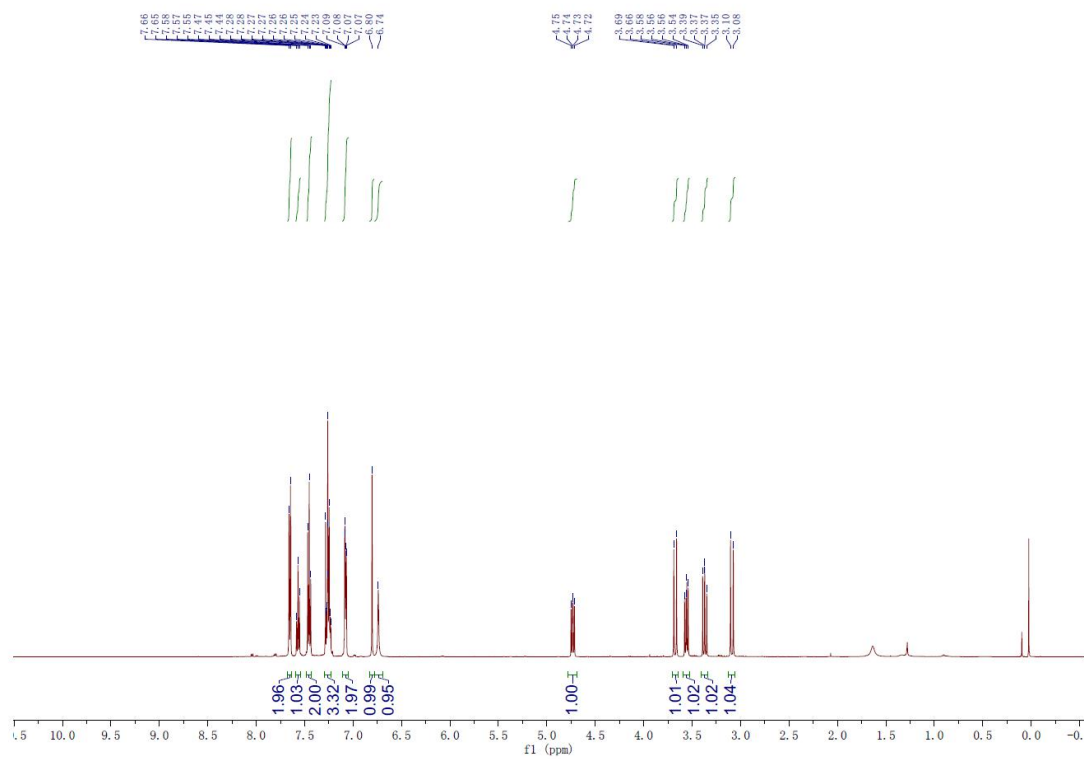

$^{13}\text{C}$  NMR of **3l**

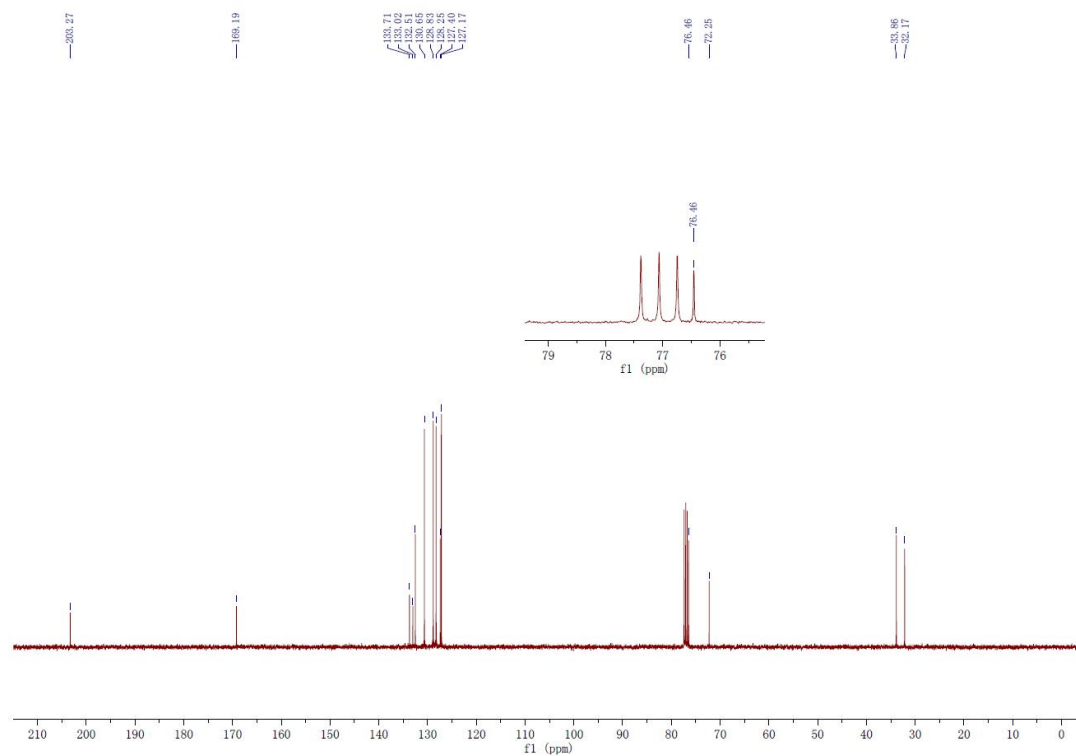

$^1\text{H}$  NMR of **3m**

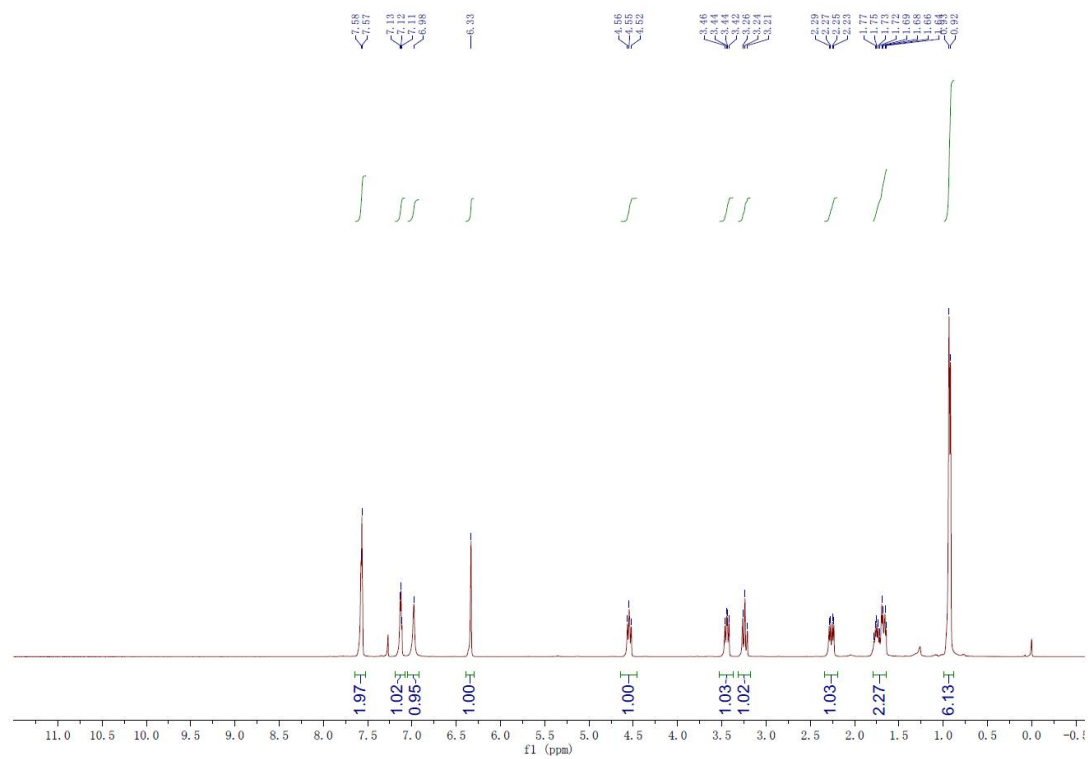

$^{13}\text{C}$  NMR of **3m**

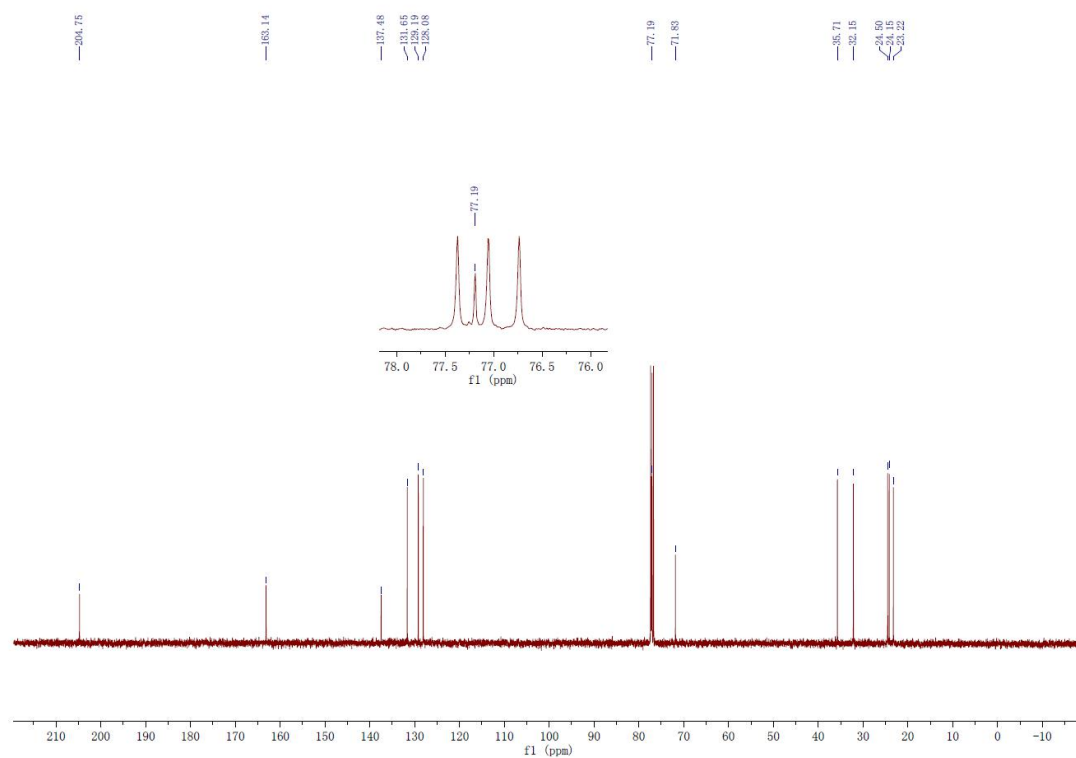

$^1\text{H}$  NMR of **3n**

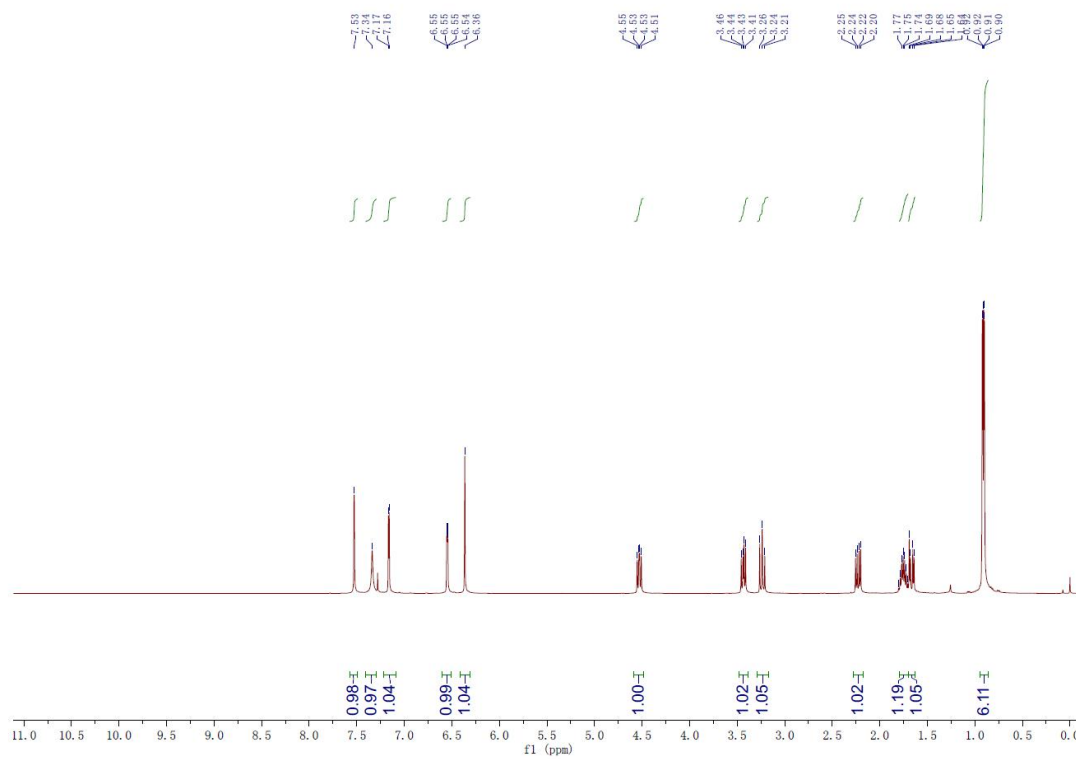

$^{13}\text{C}$  NMR of **3n**

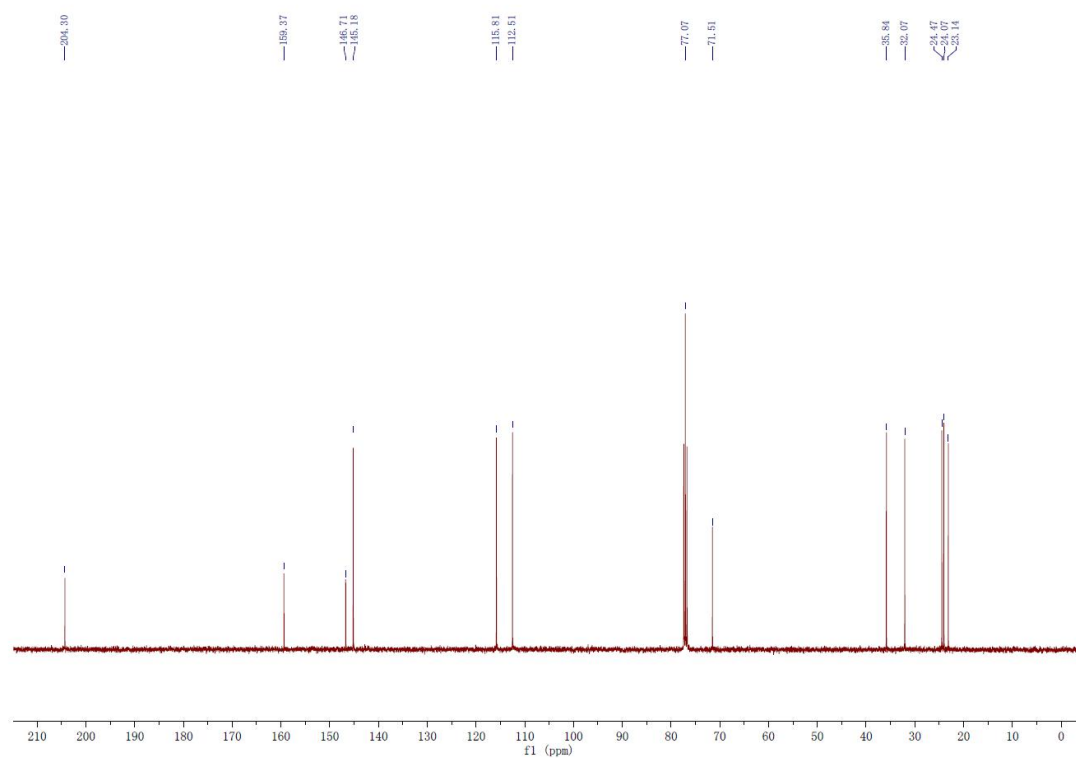

$^1\text{H}$  NMR of **3o**

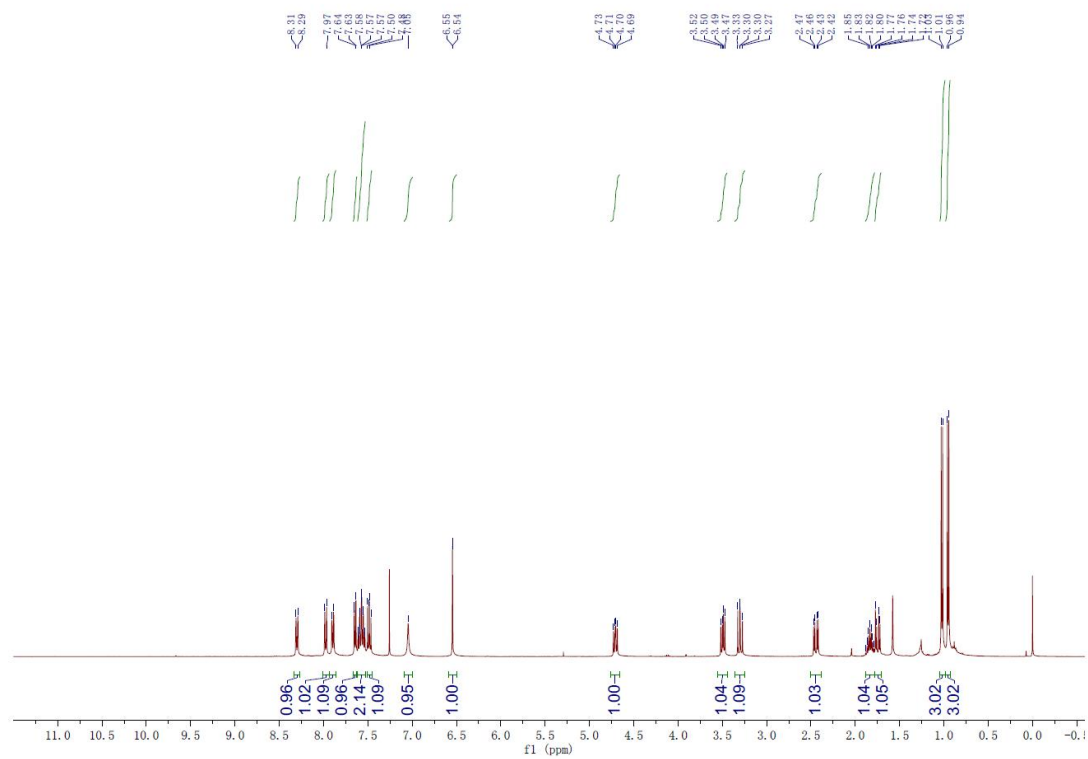

$^{13}\text{C}$  NMR of **3o**

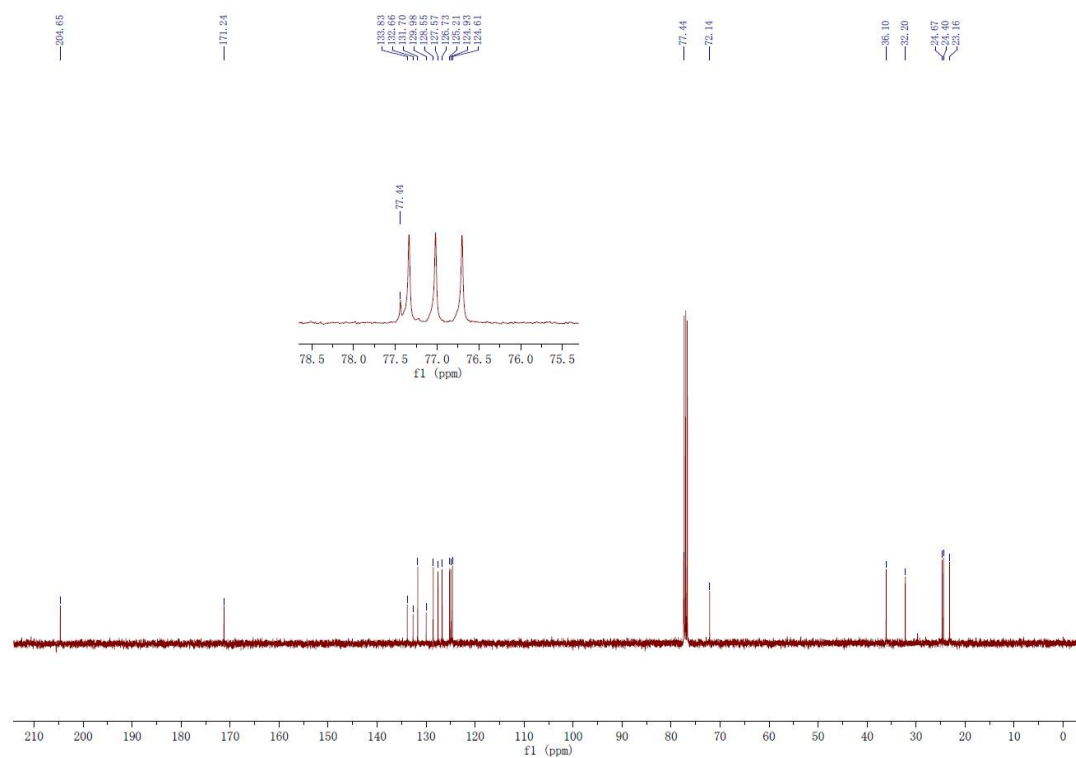

$^1\text{H}$  NMR of **3p**

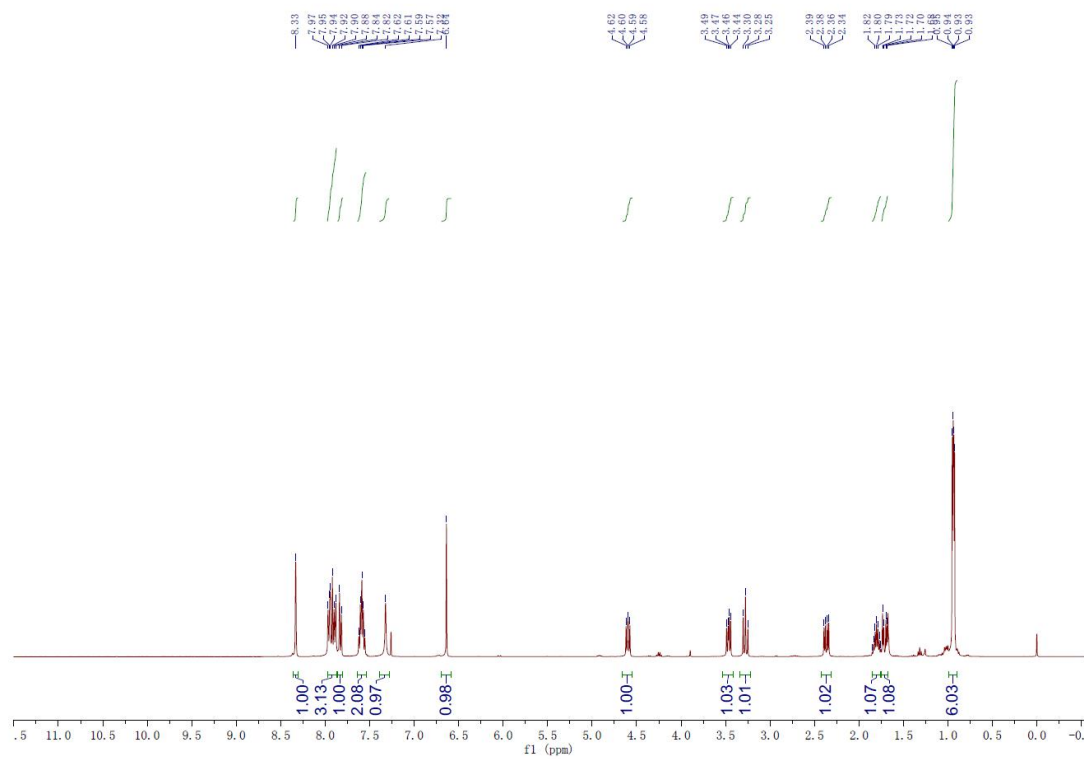

$^{13}\text{C}$  NMR of **3p**

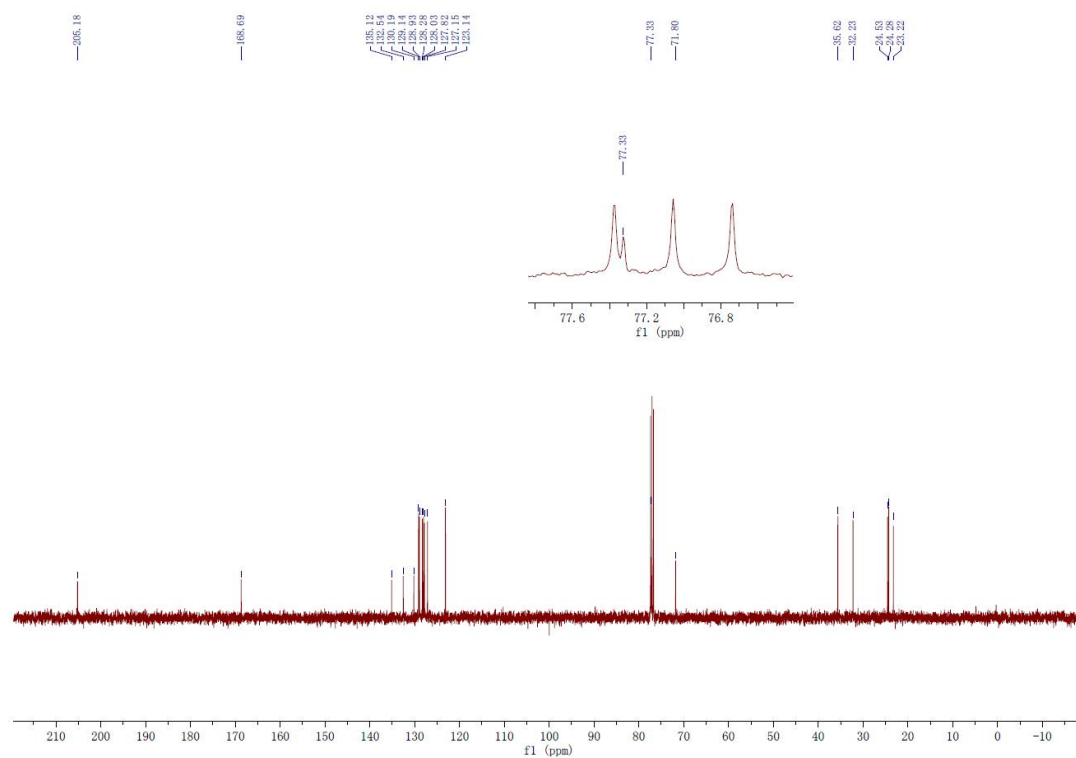

$^1\text{H}$  NMR of **3q**

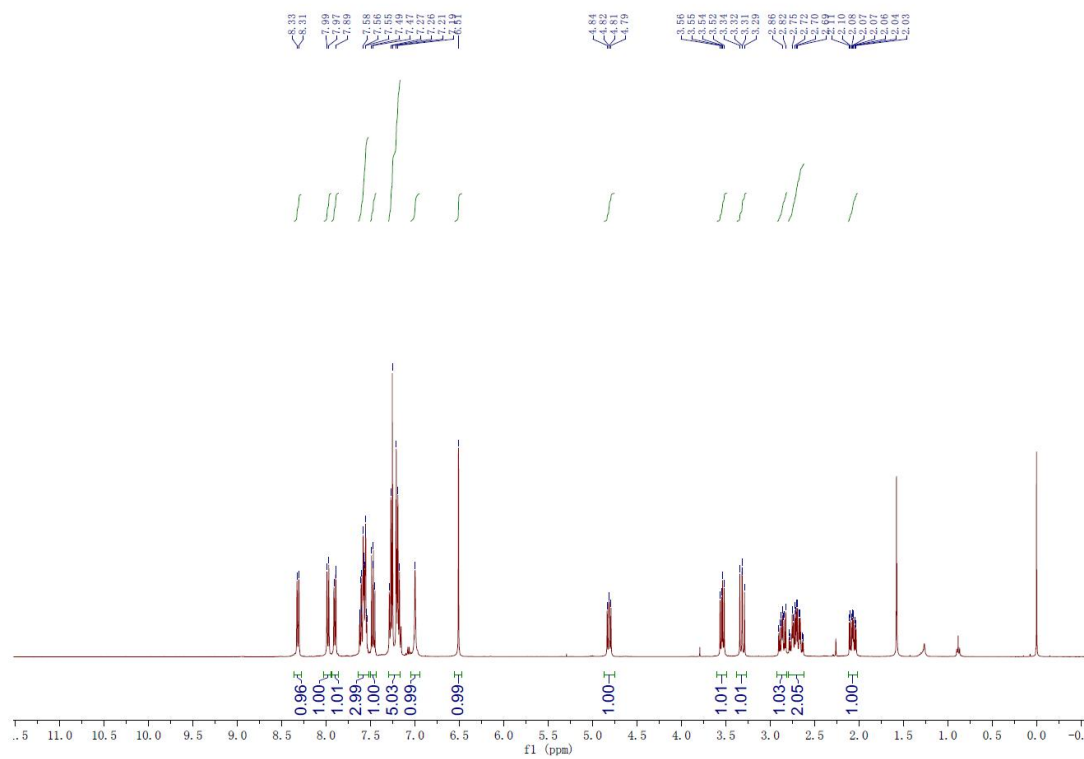



<sup>13</sup>C NMR of **3q**

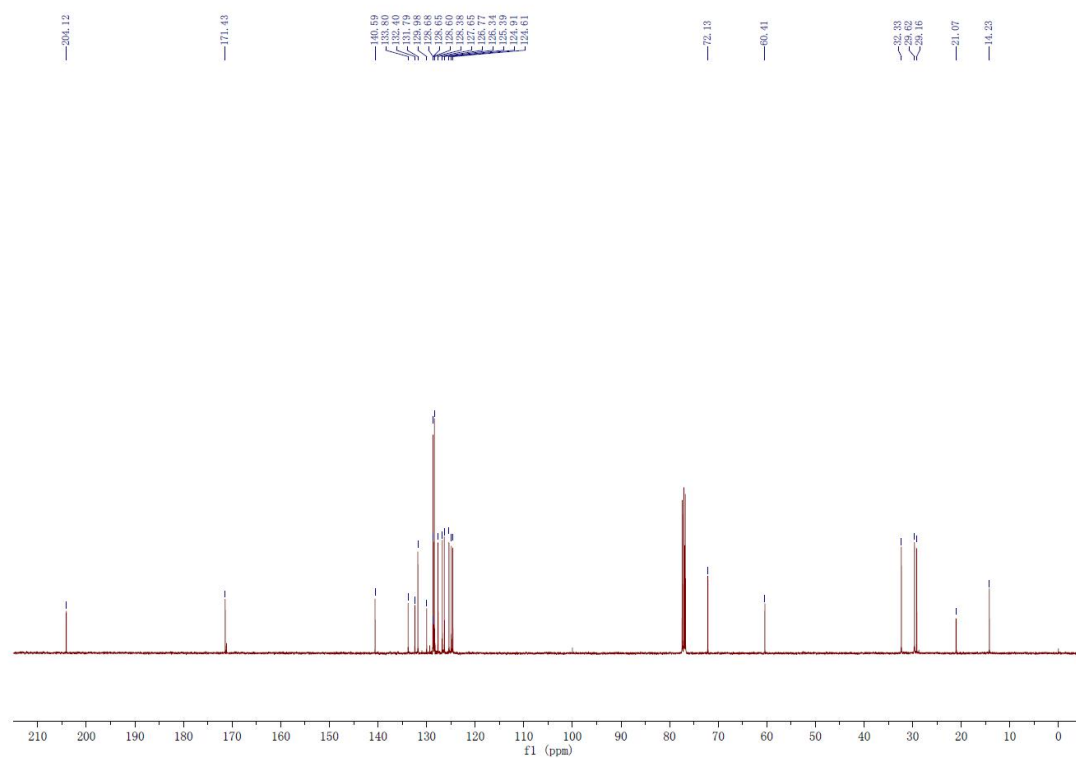

<sup>1</sup>H NMR of **3r**

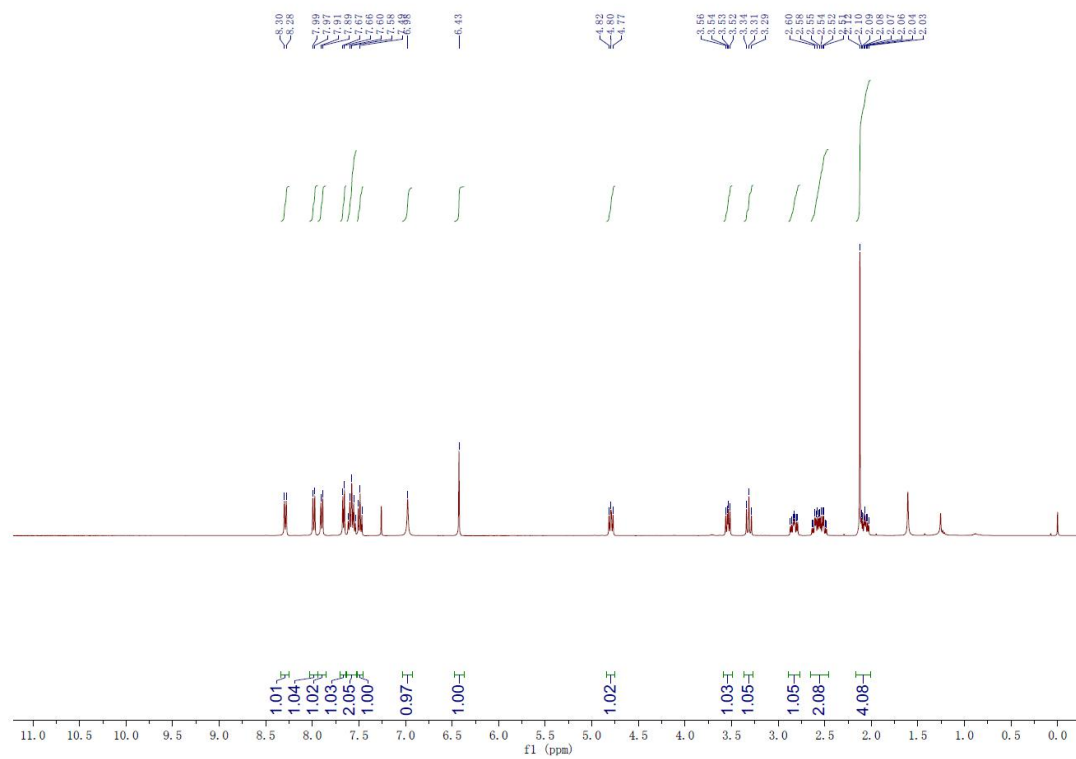

$^{13}\text{C}$  NMR of **3r**

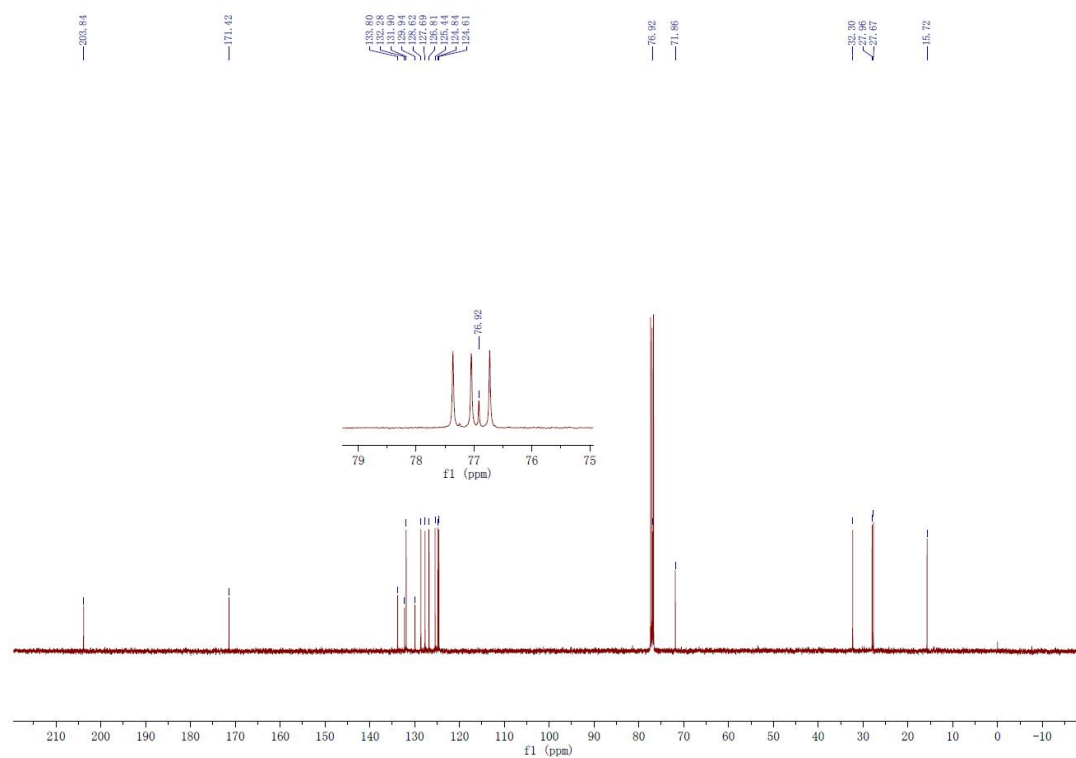

$^1\text{H}$  NMR of **3s**

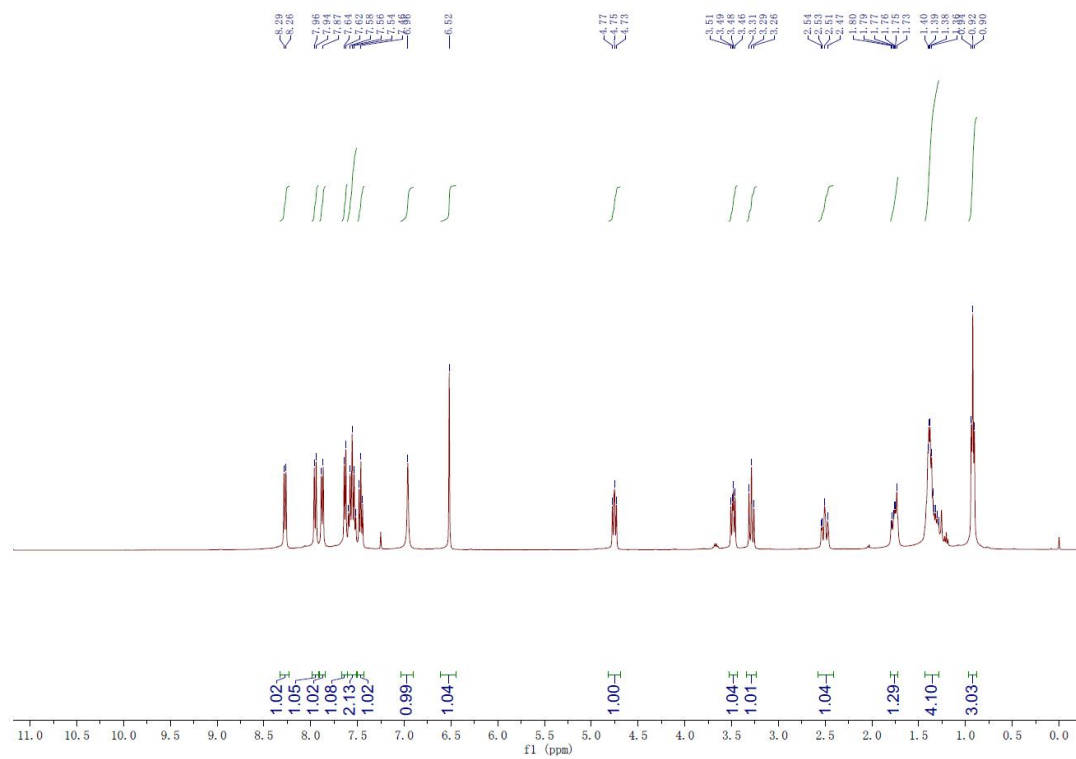

<sup>13</sup>C NMR of **3s**

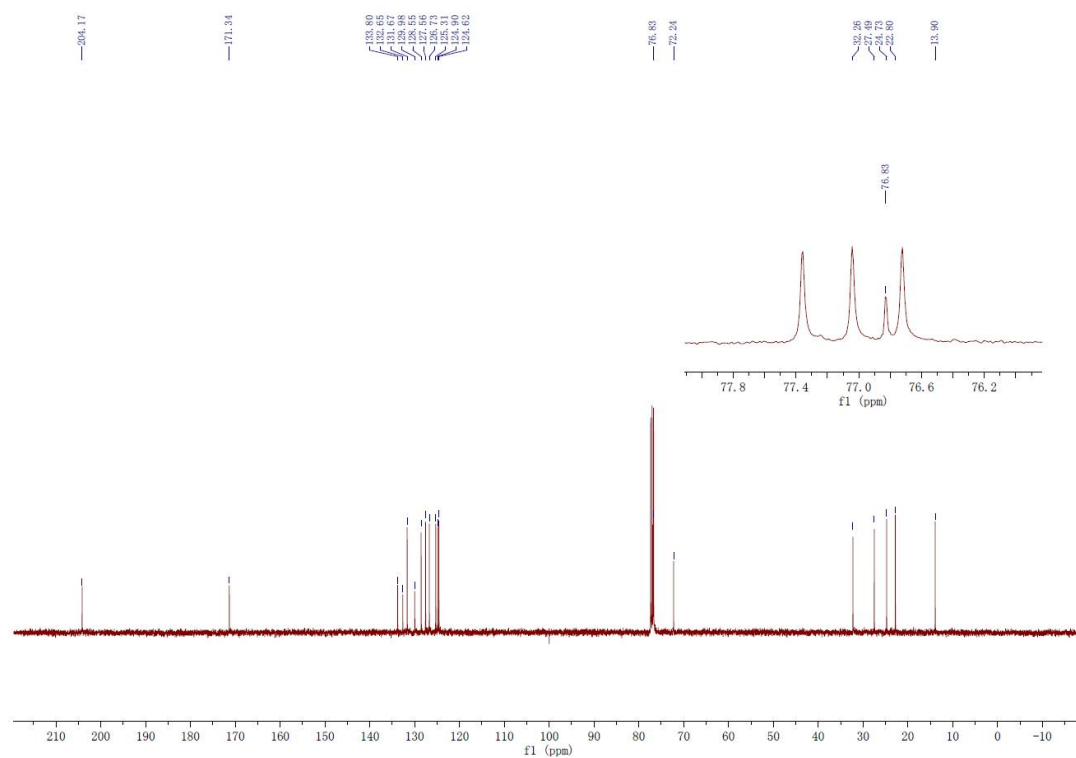

<sup>1</sup>H NMR of **3t**

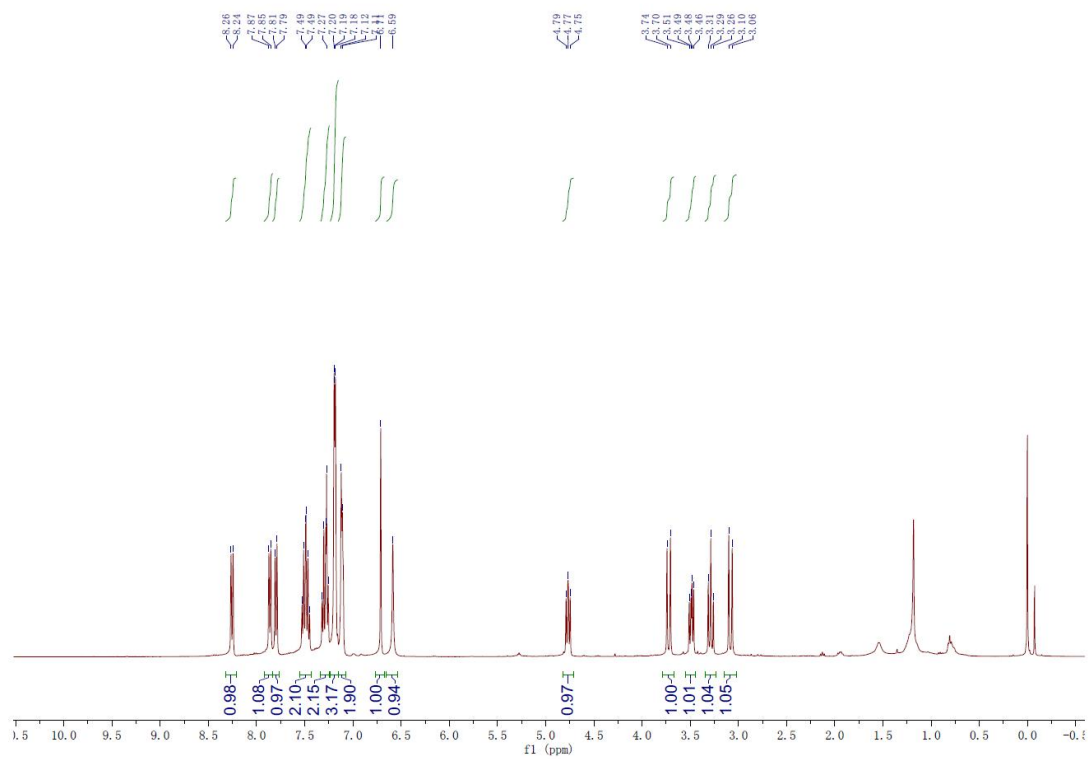

$^{13}\text{C}$  NMR of **3t**

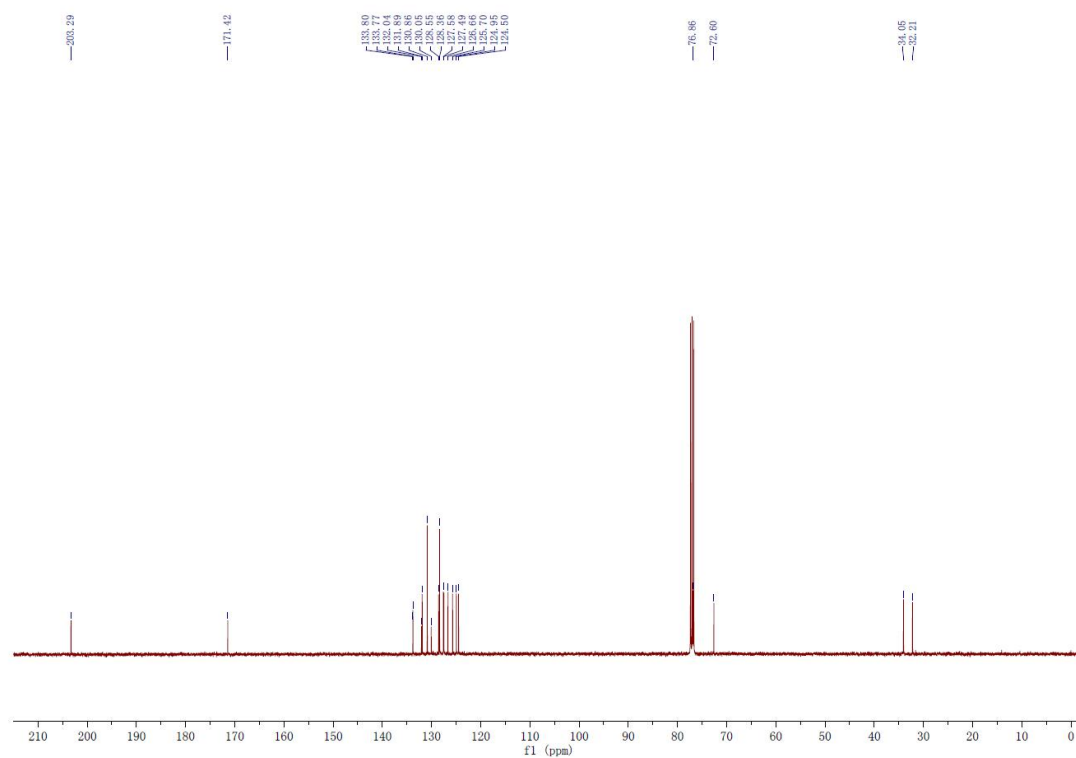

$^1\text{H}$  NMR of **4**

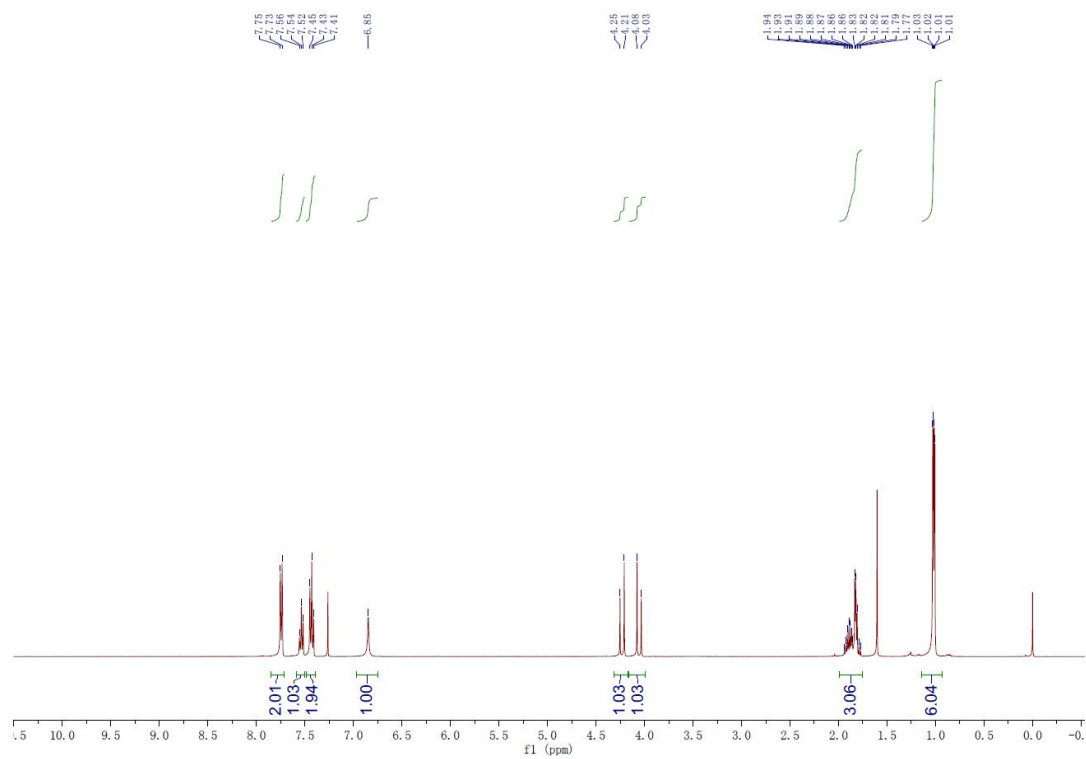

$^{13}\text{C}$  NMR of **4**

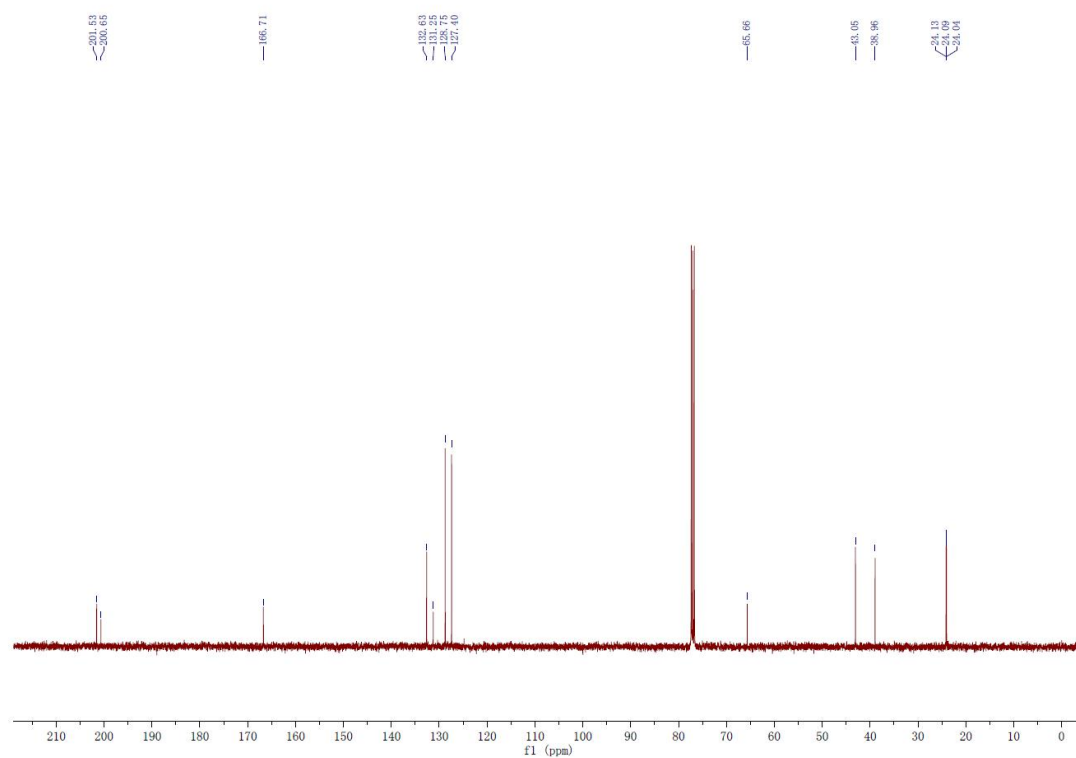

$^1\text{H}$  NMR of **5**

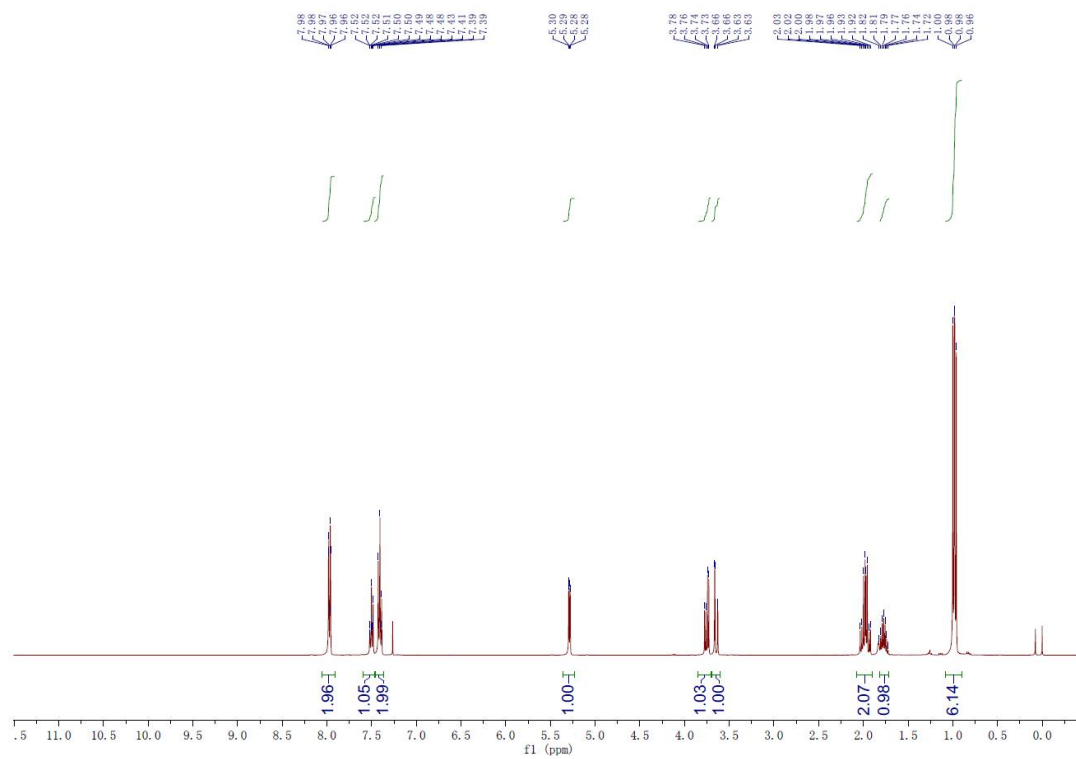

$^{13}\text{C}$  NMR of **5**

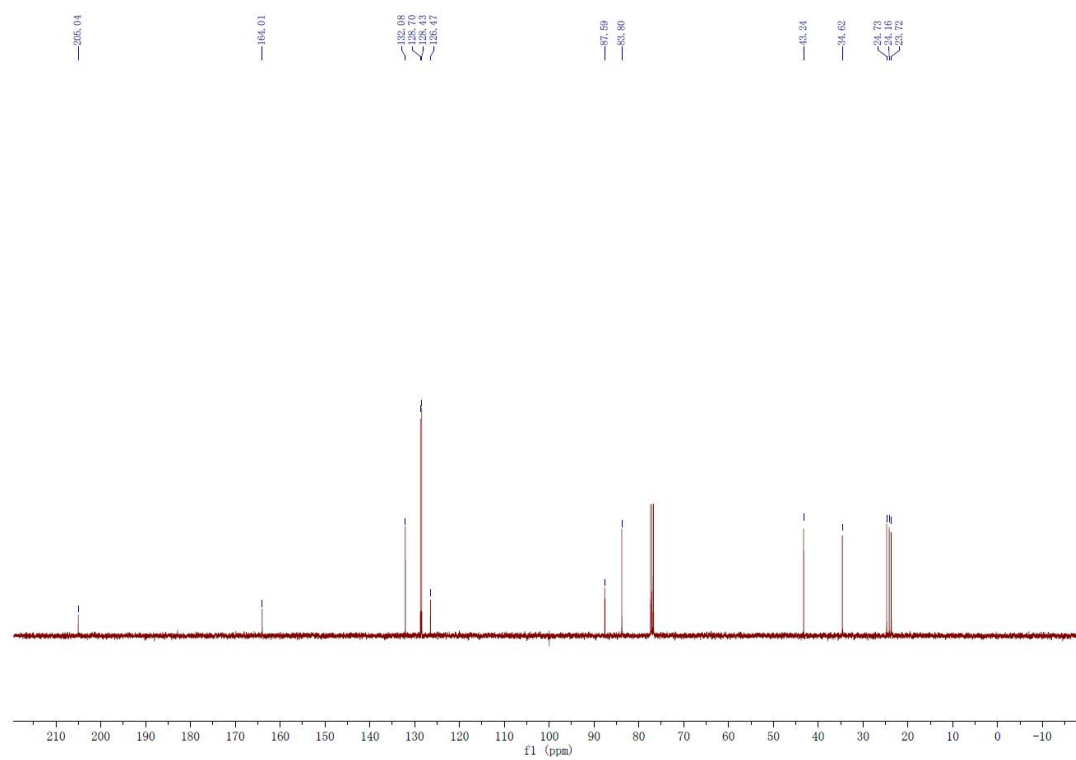

## HPLC Chromatograms

### HPLC Chromatogram of **3a**

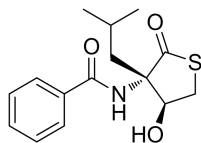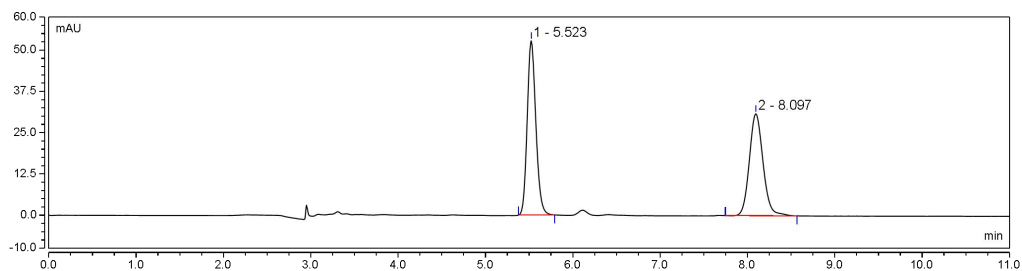

| Entry | Retention Time | Area   | Area(%) | Height |
|-------|----------------|--------|---------|--------|
| 1     | 5.523          | 6.0432 | 51.96   | 52.76  |
| 2     | 8.097          | 5.5877 | 48.04   | 30.88  |

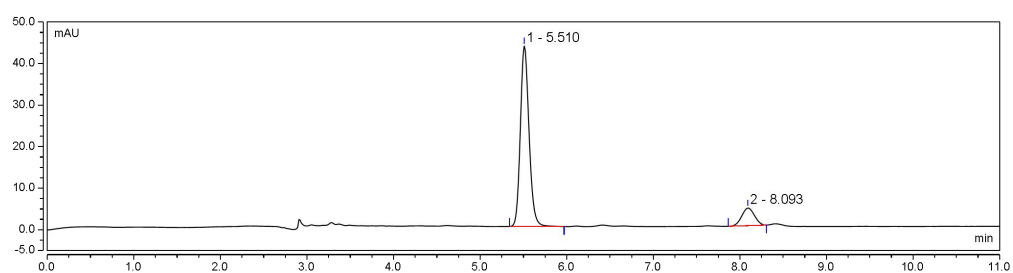

| Entry | Retention Time | Area   | Area(%) | Height |
|-------|----------------|--------|---------|--------|
| 1     | 5.510          | 4.9882 | 86.72   | 43.43  |
| 2     | 8.093          | 0.7638 | 13.28   | 4.25   |

### HPLC Chromatogram of **3b**

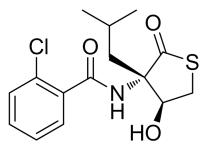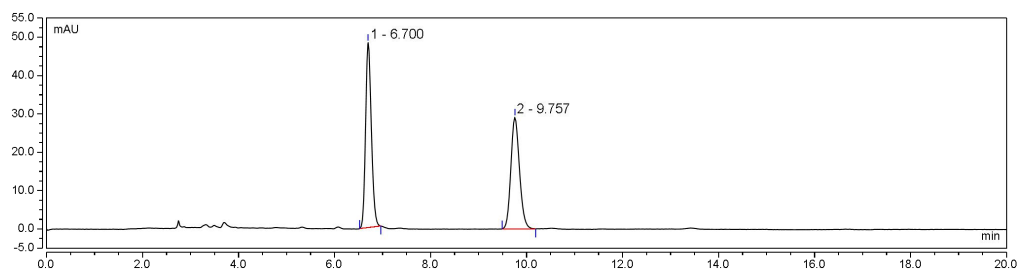

| Entry | Retention Time | Area   | Area(%) | Height |
|-------|----------------|--------|---------|--------|
| 1     | 6.700          | 6.7059 | 52.51   | 48.23  |
| 2     | 9.757          | 6.0644 | 47.49   | 29.13  |

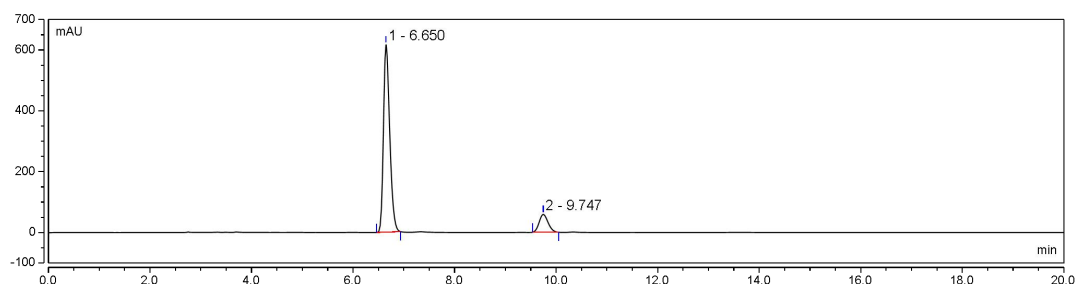

| Entry | Retention Time | Area    | Area(%) | Height |
|-------|----------------|---------|---------|--------|
| 1     | 6.650          | 88.1409 | 88.08   | 615.87 |
| 2     | 9.747          | 11.9282 | 11.92   | 58.87  |

### HPLC Chromatogram of **3c**

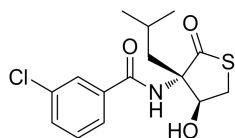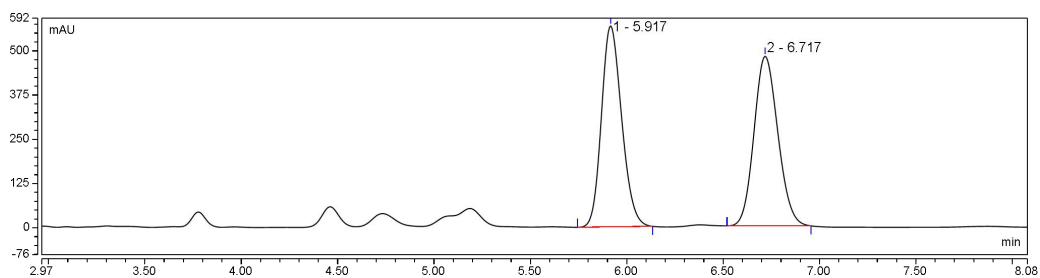

| Entry | Retention Time | Area    | Area(%) | Height |
|-------|----------------|---------|---------|--------|
| 1     | 5.917          | 69.0503 | 50.11   | 567.86 |
| 2     | 6.717          | 68.7444 | 49.89   | 479.15 |

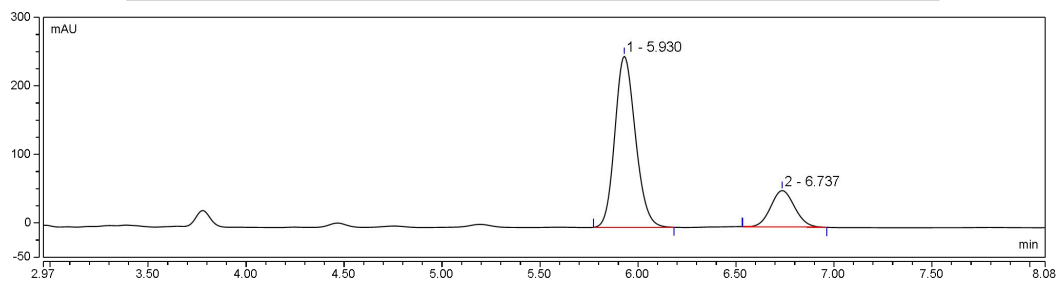

| Entry | Retention Time | Area    | Area(%) | Height |
|-------|----------------|---------|---------|--------|
| 1     | 5.930          | 30.5365 | 80.61   | 249.67 |
| 2     | 6.737          | 7.3421  | 19.39   | 53.13  |



### HPLC Chromatogram of **3d**

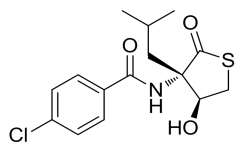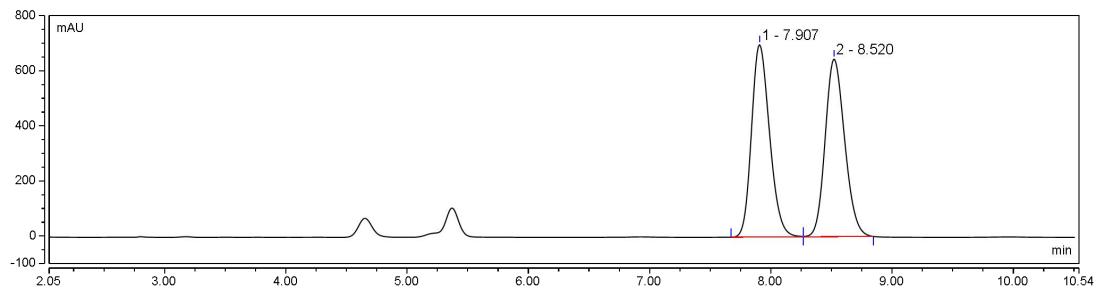

| Entry | Retention Time | Area     | Area(%) | Height |
|-------|----------------|----------|---------|--------|
| 1     | 7.907          | 120.8816 | 50.11   | 698.72 |
| 2     | 8.520          | 120.3506 | 49.89   | 645.07 |

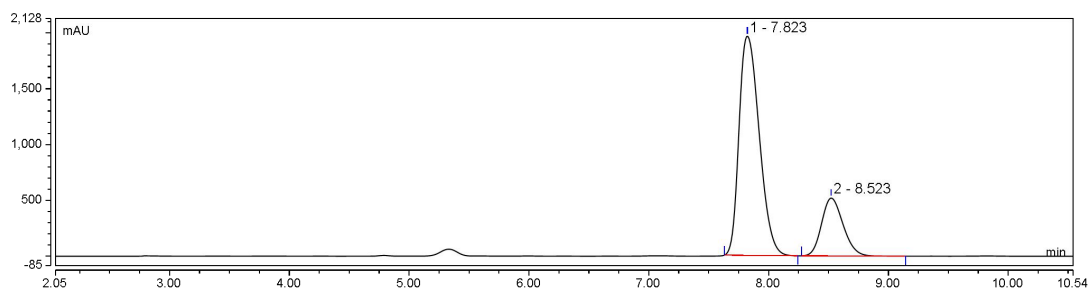

| Entry | Retention Time | Area     | Area(%) | Height  |
|-------|----------------|----------|---------|---------|
| 1     | 7.823          | 384.0387 | 78.09   | 1965.60 |
| 2     | 8.523          | 107.7582 | 21.91   | 518.43  |

### HPLC Chromatogram of **3e**

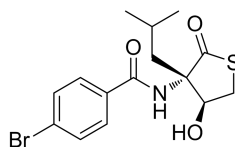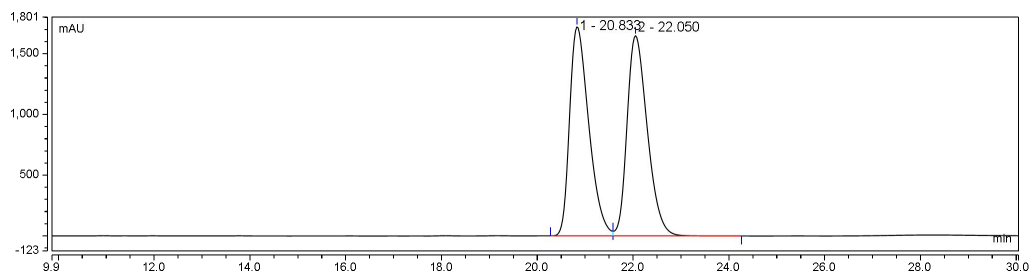

| Entry | Retention Time | Area     | Area(%) | Height  |
|-------|----------------|----------|---------|---------|
| 1     | 20.833         | 800.6653 | 49.77   | 1722.87 |
| 2     | 22.050         | 807.9279 | 50.23   | 1649.46 |

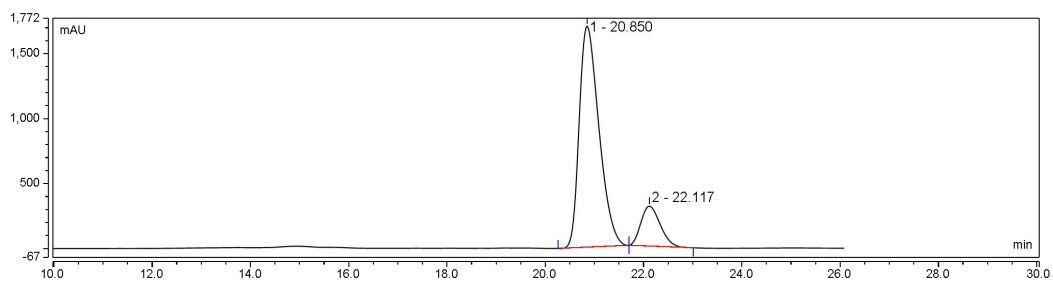

| Entry | Retention Time | Area     | Area(%) | Height  |
|-------|----------------|----------|---------|---------|
| 1     | 20.850         | 790.4015 | 84.99   | 1702.23 |
| 2     | 22.117         | 139.6236 | 15.01   | 307.40  |

HPLC Chromatogram of **3f**

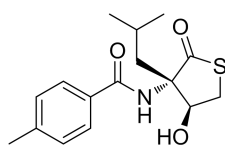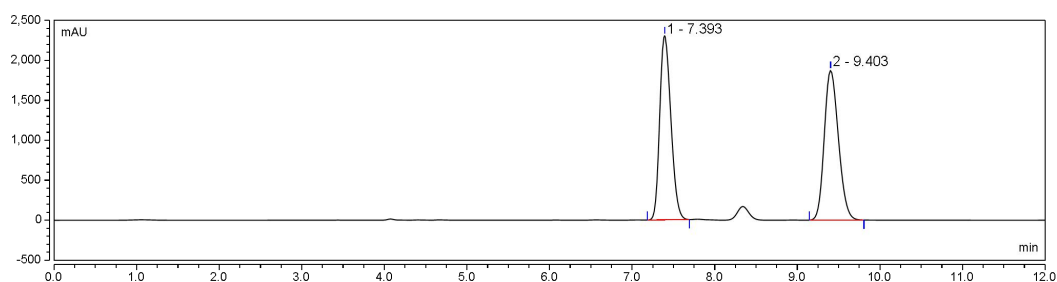

| Entry | Retention Time | Area     | Area(%) | Height  |
|-------|----------------|----------|---------|---------|
| 1     | 7.393          | 361.0165 | 49.23   | 2304.33 |
| 2     | 9.403          | 372.3746 | 50.77   | 1873.15 |

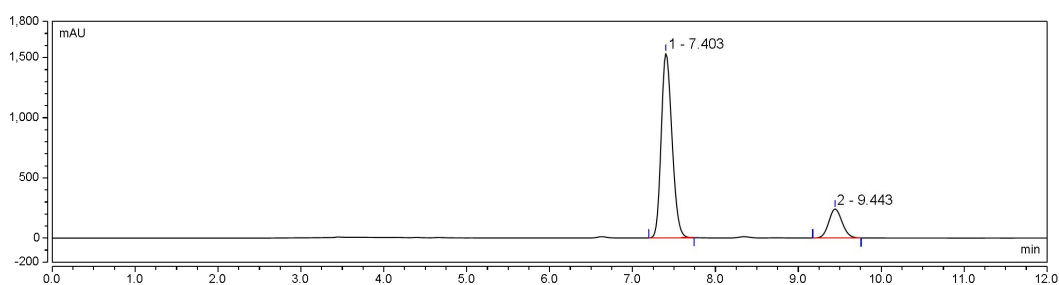

| Entry | Retention Time | Area     | Area(%) | Height  |
|-------|----------------|----------|---------|---------|
| 1     | 7.403          | 231.8409 | 83.99   | 1534.50 |
| 2     | 9.443          | 44.1852  | 16.01   | 241.08  |

HPLC Chromatogram of **3g**

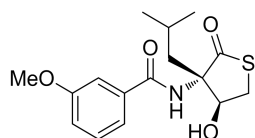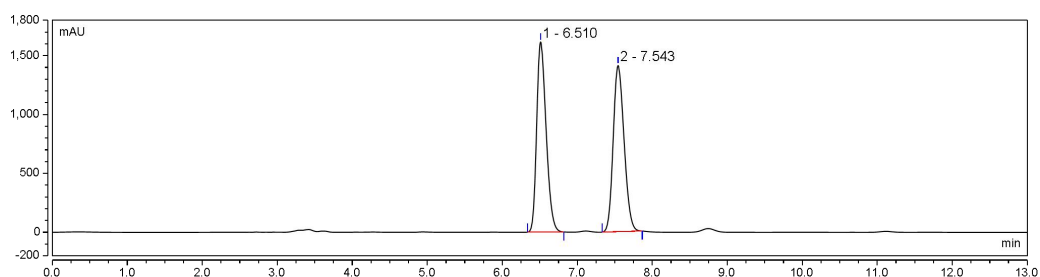

| Entry | Retention Time | Area     | Area(%) | Height  |
|-------|----------------|----------|---------|---------|
| 1     | 6.510          | 235.7324 | 49.87   | 1615.16 |
| 2     | 7.543          | 236.9663 | 50.13   | 1411.28 |

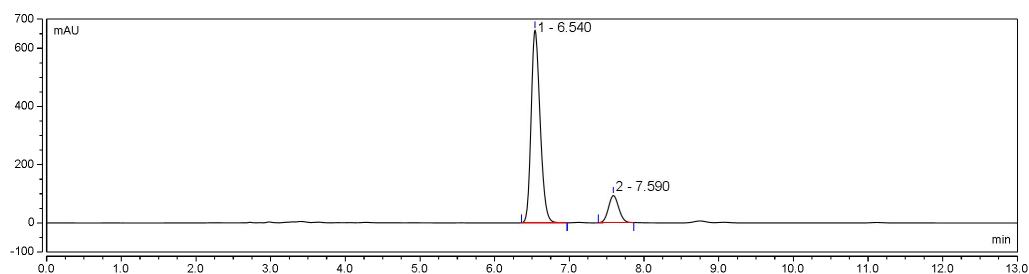

| Entry | Retention Time | Area    | Area(%) | Height |
|-------|----------------|---------|---------|--------|
| 1     | 6.540          | 92.3115 | 86.17   | 662.12 |
| 2     | 7.590          | 14.8179 | 13.83   | 93.68  |

### HPLC Chromatogram of **3h**

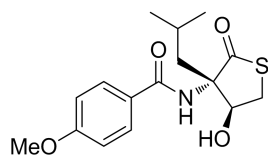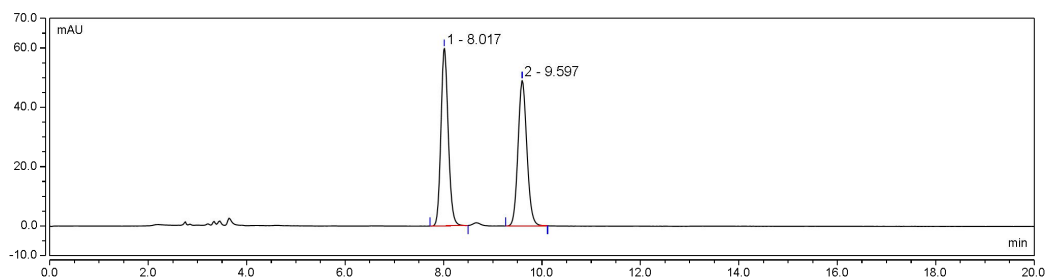

| Entry | Retention Time | Area    | Area(%) | Height |
|-------|----------------|---------|---------|--------|
| 1     | 8.017          | 10.2658 | 50.08   | 59.86  |
| 2     | 9.597          | 10.2311 | 49.92   | 49.03  |

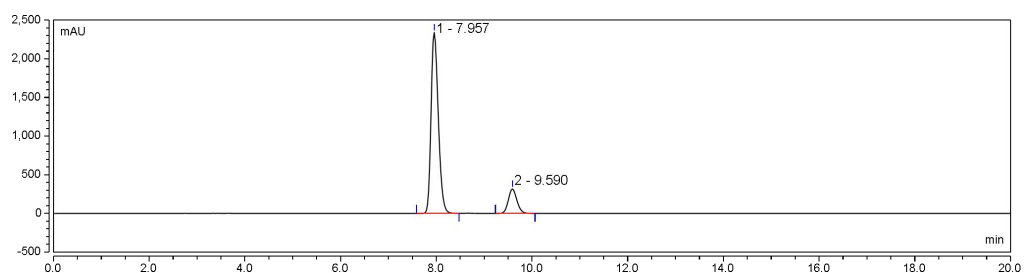

| Entry | Retention Time | Area     | Area(%) | Height  |
|-------|----------------|----------|---------|---------|
| 1     | 7.957          | 409.7811 | 86.18   | 2340.10 |
| 2     | 9.590          | 65.6988  | 13.82   | 317.07  |

### HPLC Chromatogram of **3i**

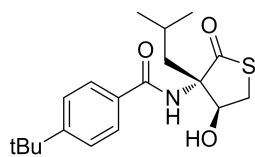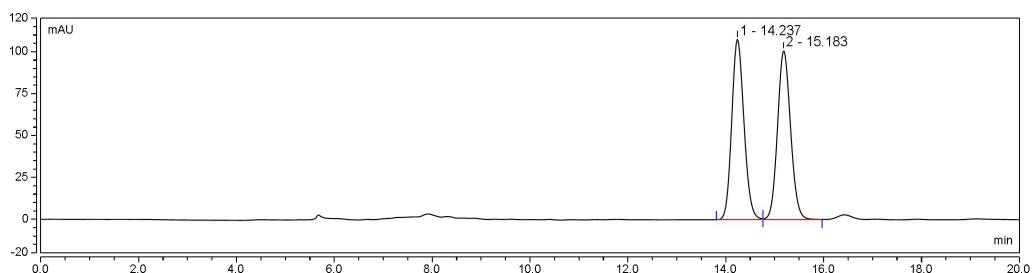

| Entry | Retention Time | Area    | Area(%) | Height |
|-------|----------------|---------|---------|--------|
| 1     | 14.237         | 31.2486 | 50.00   | 107.74 |
| 2     | 15.183         | 31.2450 | 50.00   | 100.85 |

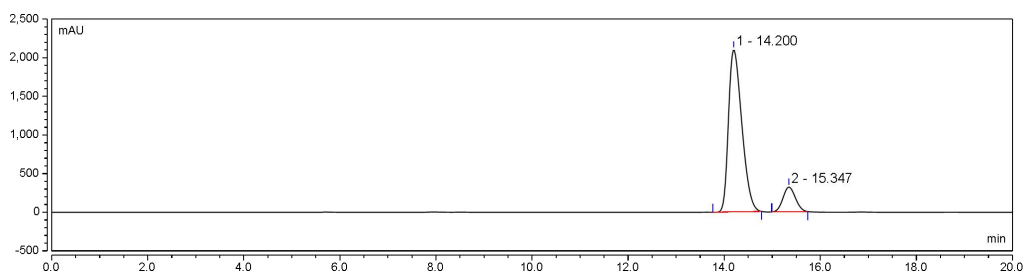

| Entry | Retention Time | Area     | Area(%) | Height  |
|-------|----------------|----------|---------|---------|
| 1     | 14.200         | 674.4919 | 87.54   | 2099.93 |
| 2     | 15.347         | 96.0209  | 12.46   | 319.80  |

### HPLC Chromatogram of **3j**

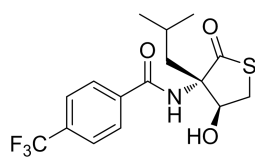

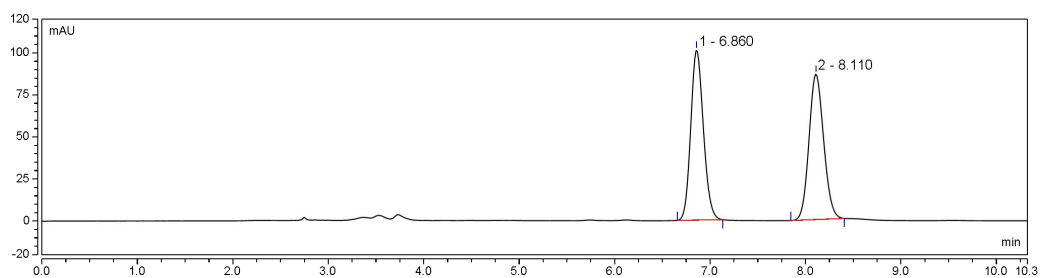

| Entry | Retention Time | Area    | Area(%) | Height |
|-------|----------------|---------|---------|--------|
| 1     | 6.860          | 15.5458 | 50.24   | 101.25 |
| 2     | 8.110          | 15.5458 | 49.76   | 86.51  |

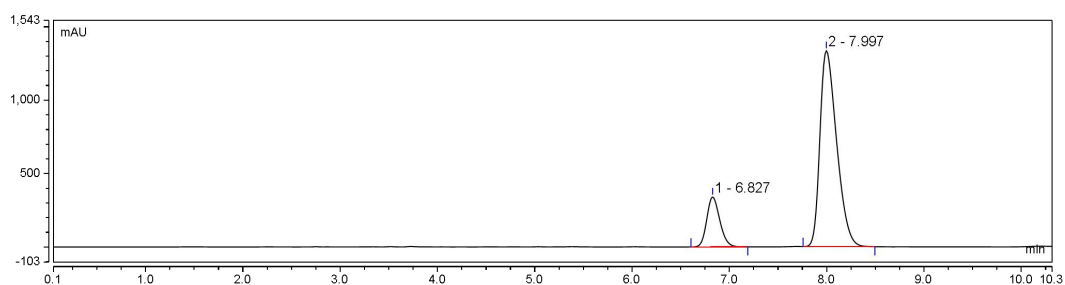

| Entry | Retention Time | Area     | Area(%) | Height  |
|-------|----------------|----------|---------|---------|
| 1     | 6.827          | 51.7131  | 16.27   | 340.52  |
| 2     | 7.997          | 266.1935 | 83.73   | 1335.20 |

### HPLC Chromatogram of **3k**

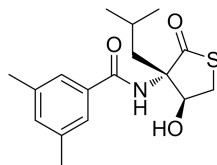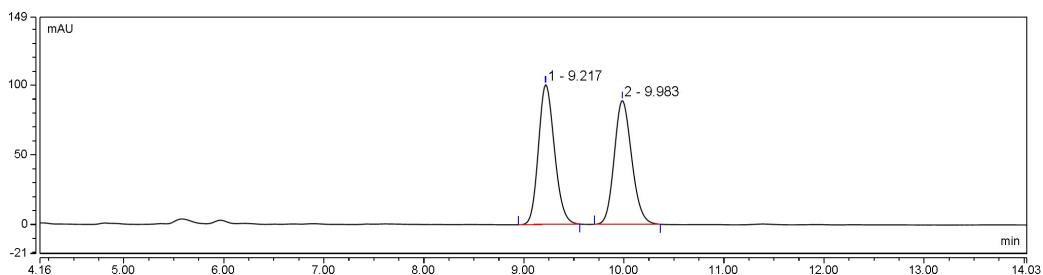

| Entry | Retention Time | Area    | Area(%) | Height |
|-------|----------------|---------|---------|--------|
| 1     | 9.217          | 18.5936 | 50.87   | 100.33 |
| 2     | 9.983          | 17.9588 | 49.13   | 88.83  |

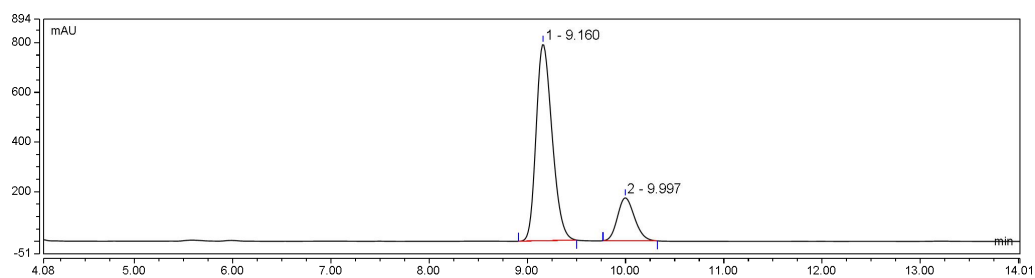

| Entry | Retention Time | Area     | Area(%) | Height |
|-------|----------------|----------|---------|--------|
| 1     | 9.160          | 149.2685 | 81.12   | 791.88 |
| 2     | 9.997          | 34.7476  | 18.88   | 173.00 |

### HPLC Chromatogram of **3I**

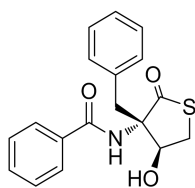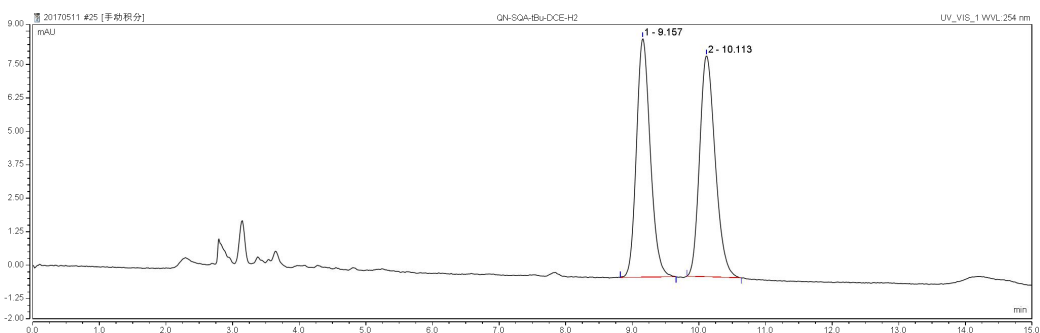

| Entry | Retention Time | Area   | Area(%) | Height |
|-------|----------------|--------|---------|--------|
| 1     | 9.157          | 2.1476 | 48.94   | 8.92   |
| 2     | 10.113         | 2.2408 | 51.06   | 8.26   |

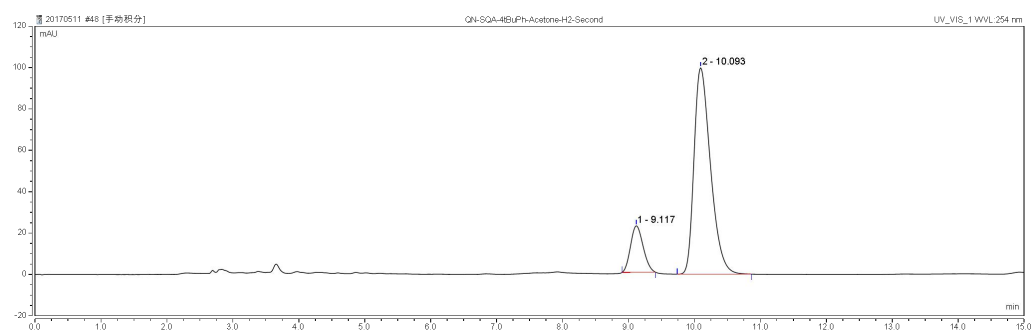

| Entry | Retention Time | Area    | Area(%) | Height |
|-------|----------------|---------|---------|--------|
| 1     | 9.117          | 4.9687  | 14.67   | 22.49  |
| 2     | 10.093         | 28.9008 | 85.33   | 99.77  |

### HPLC Chromatogram of **3m**

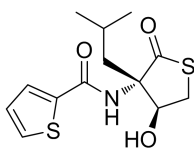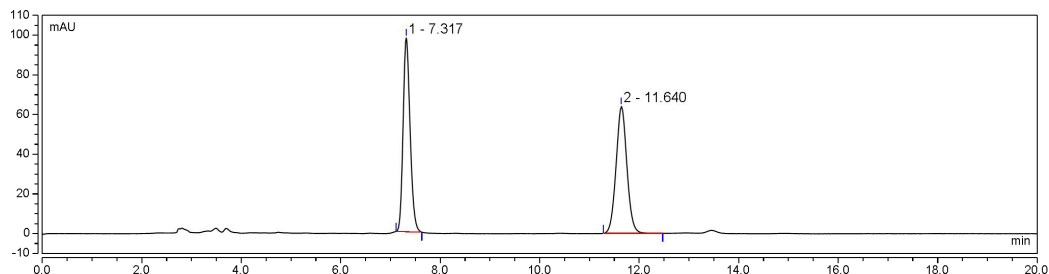

| Entry | Retention Time | Area    | Area(%) | Height |
|-------|----------------|---------|---------|--------|
| 1     | 7.317          | 15.8622 | 49.59   | 97.72  |
| 2     | 11.640         | 16.1267 | 50.41   | 64.03  |

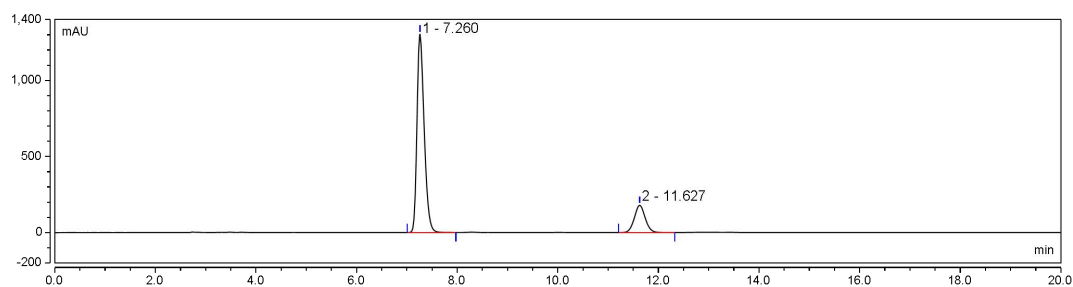

| Entry | Retention Time | Area     | Area(%) | Height  |
|-------|----------------|----------|---------|---------|
| 1     | 7.260          | 215.6287 | 82.86   | 1303.69 |
| 2     | 11.627         | 44.6118  | 17.14   | 179.77  |

### HPLC Chromatogram of **3n**

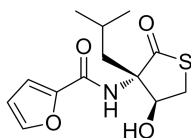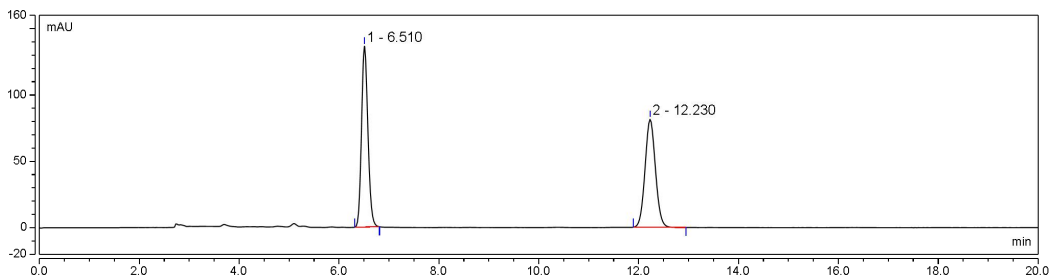

| Entry | Retention Time | Area    | Area(%) | Height |
|-------|----------------|---------|---------|--------|
| 1     | 6.510          | 20.1978 | 50.75   | 136.29 |
| 2     | 12.230         | 19.6034 | 49.25   | 81.40  |

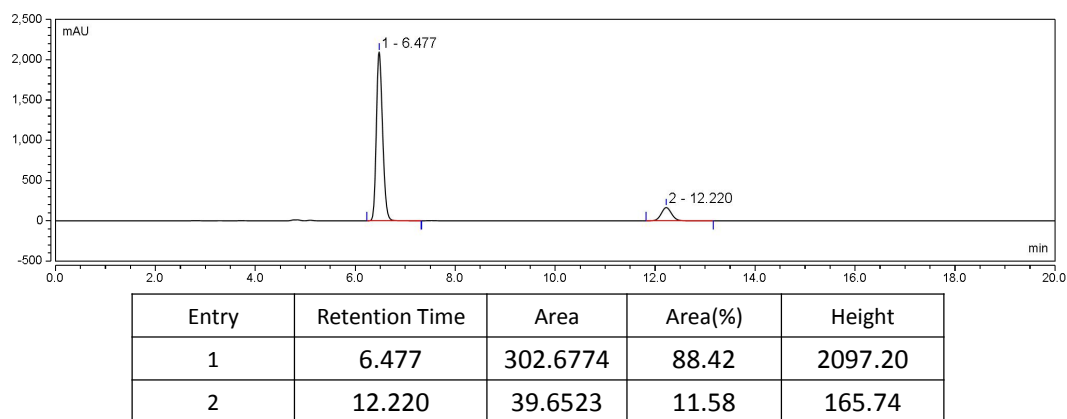

HPLC Chromatogram of **3o**

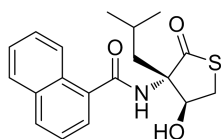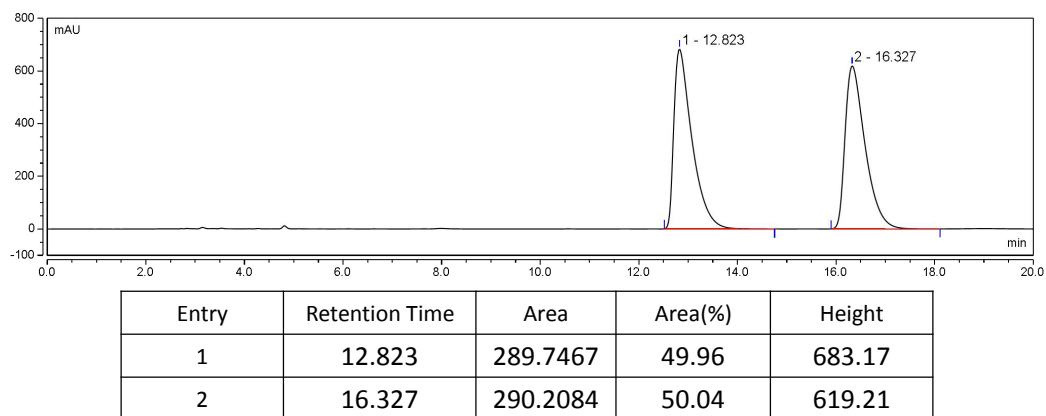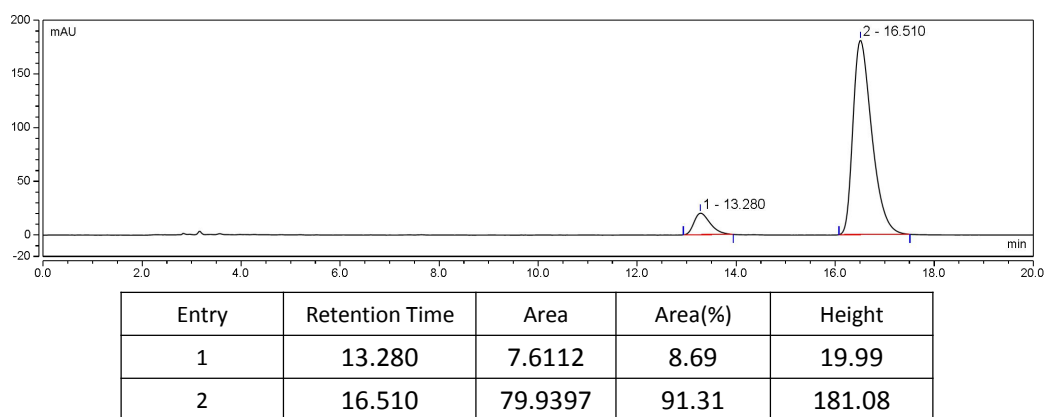

HPLC Chromatogram of **3p**

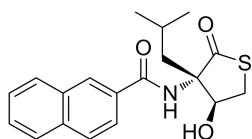



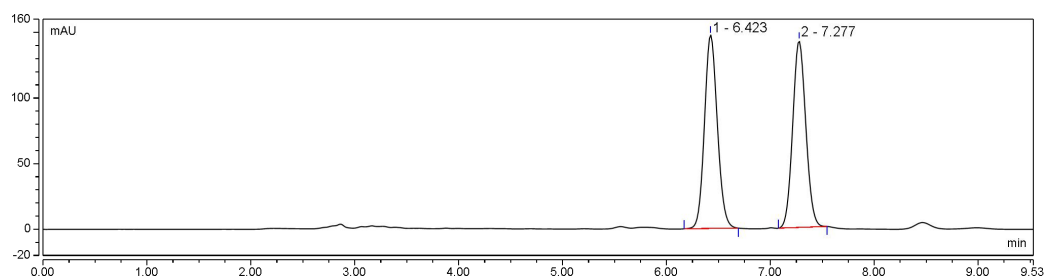

| Entry | Retention Time | Area    | Area(%) | Height |
|-------|----------------|---------|---------|--------|
| 1     | 6.423          | 21.2229 | 50.51   | 147.61 |
| 2     | 7.277          | 20.7957 | 49.49   | 142.25 |

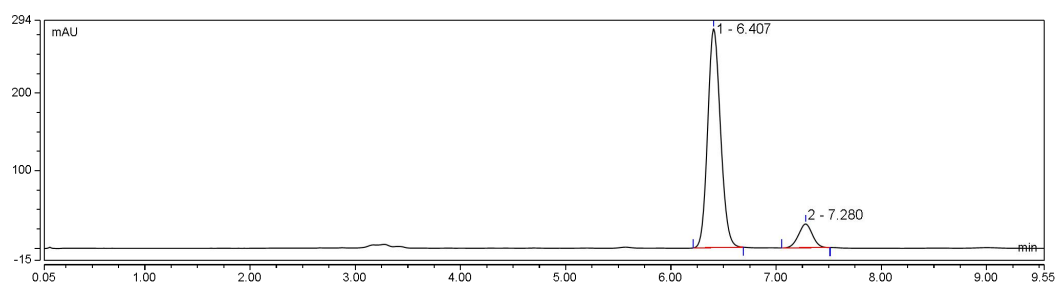

| Entry | Retention Time | Area    | Area(%) | Height |
|-------|----------------|---------|---------|--------|
| 1     | 6.407          | 39.8315 | 89.50   | 281.94 |
| 2     | 7.280          | 4.6729  | 10.50   | 30.66  |

### HPLC Chromatogram of **3q**

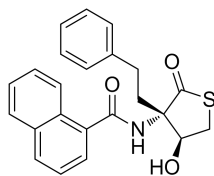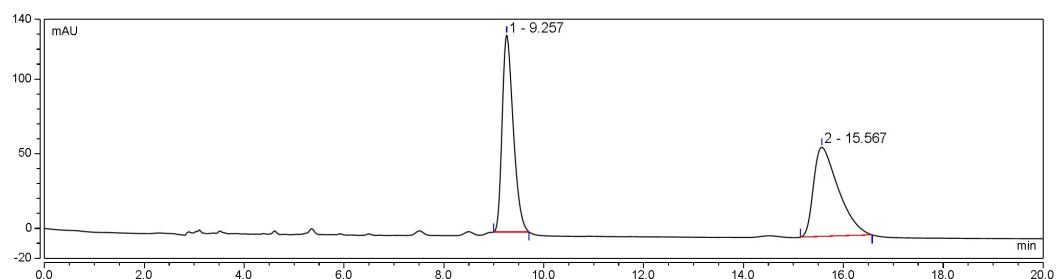

| Entry | Retention Time | Area    | Area(%) | Height |
|-------|----------------|---------|---------|--------|
| 1     | 9.257          | 34.0551 | 49.77   | 132.00 |
| 2     | 15.567         | 34.3711 | 50.23   | 59.77  |

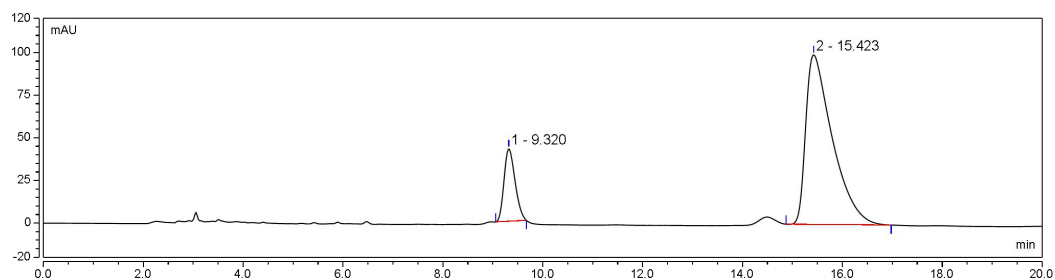

| Entry | Retention Time | Area    | Area(%) | Height |
|-------|----------------|---------|---------|--------|
| 1     | 9.320          | 10.8697 | 15.06   | 42.49  |
| 2     | 15.423         | 61.3264 | 84.94   | 99.45  |

### HPLC Chromatogram of **3r**

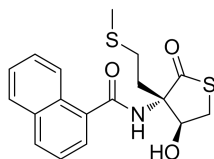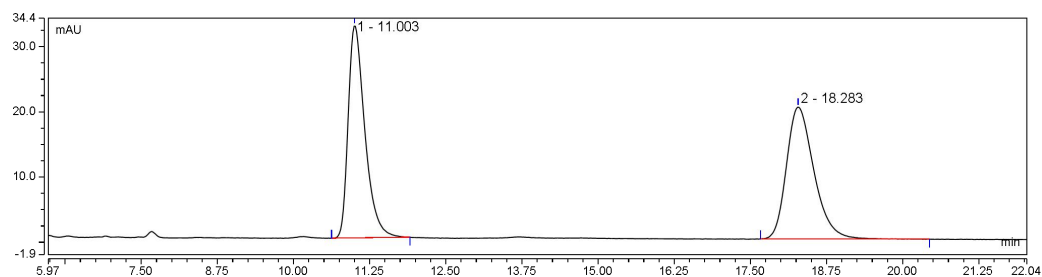

| Entry | Retention Time | Area    | Area(%) | Height |
|-------|----------------|---------|---------|--------|
| 1     | 11.003         | 10.3501 | 49.48   | 32.59  |
| 2     | 18.283         | 10.5682 | 50.52   | 20.23  |

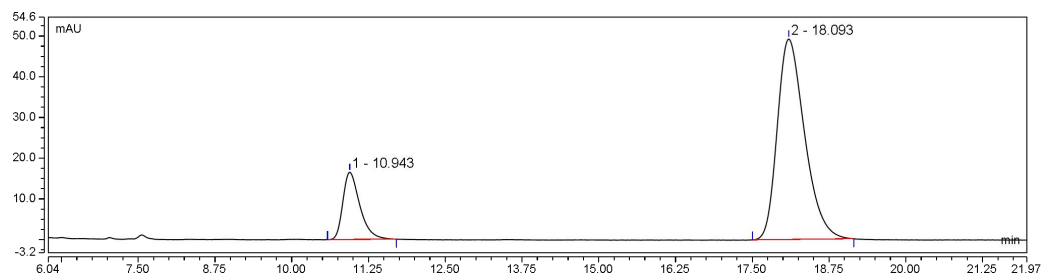

| Entry | Retention Time | Area    | Area(%) | Height |
|-------|----------------|---------|---------|--------|
| 1     | 10.943         | 5.1849  | 16.91   | 16.54  |
| 2     | 18.093         | 25.4752 | 83.09   | 49.26  |

### HPLC Chromatogram of **3s**

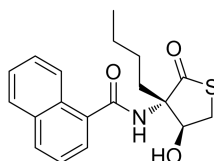

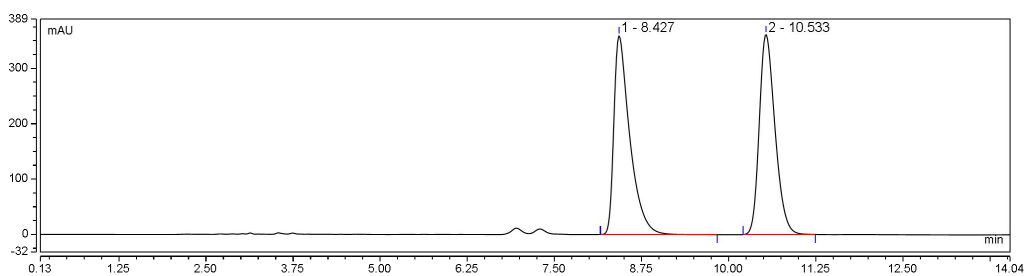

| Entry | Retention Time | Area    | Area(%) | Height |
|-------|----------------|---------|---------|--------|
| 1     | 8.427          | 95.1339 | 50.11   | 359.35 |
| 2     | 10.533         | 94.7156 | 49.89   | 361.73 |

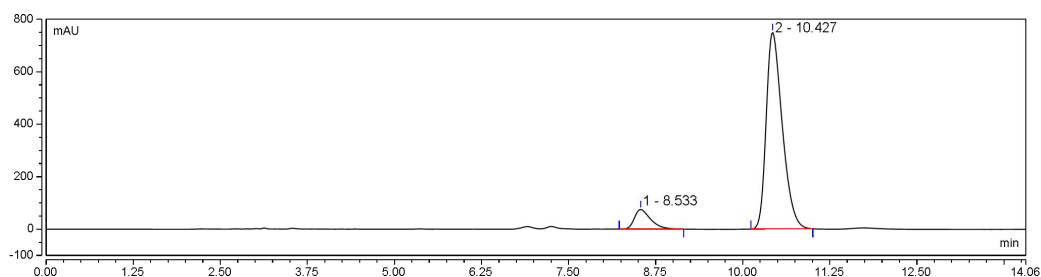

| Entry | Retention Time | Area     | Area(%) | Height |
|-------|----------------|----------|---------|--------|
| 1     | 8.533          | 17.6167  | 8.00    | 74.44  |
| 2     | 10.427         | 202.7059 | 92.00   | 749.73 |

### HPLC Chromatogram of **3t**

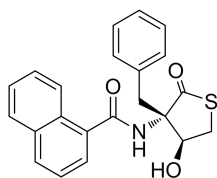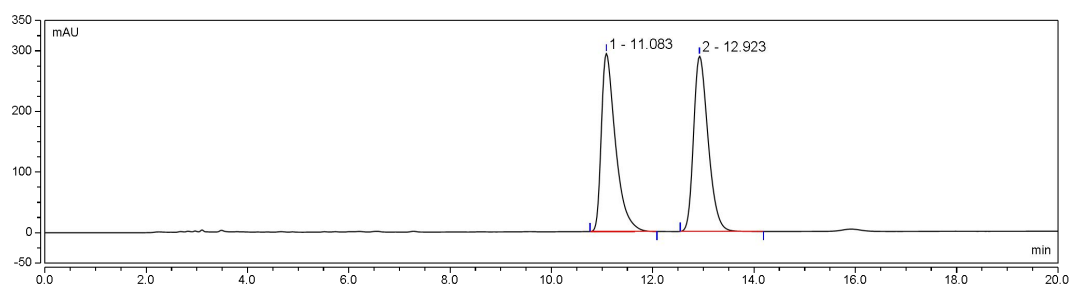

| Entry | Retention Time | Area    | Area(%) | Height |
|-------|----------------|---------|---------|--------|
| 1     | 11.083         | 95.3211 | 49.80   | 294.15 |
| 2     | 12.923         | 96.1028 | 50.20   | 289.36 |

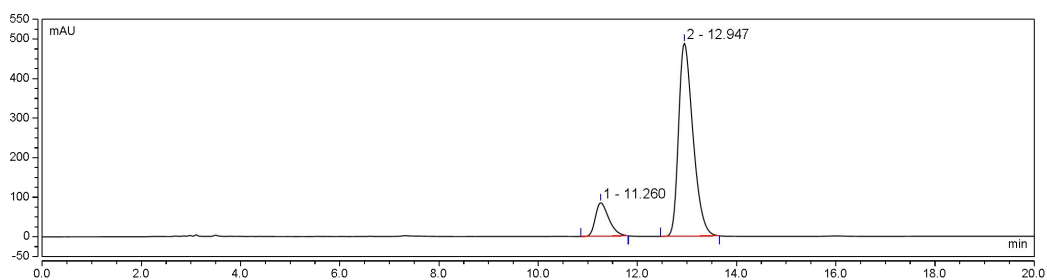

| Entry | Retention Time | Area     | Area(%) | Height |
|-------|----------------|----------|---------|--------|
| 1     | 11.260         | 26.6148  | 13.95   | 84.63  |
| 2     | 12.947         | 164.2381 | 86.05   | 488.49 |

#### HPLC Chromatogram of 4

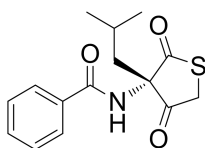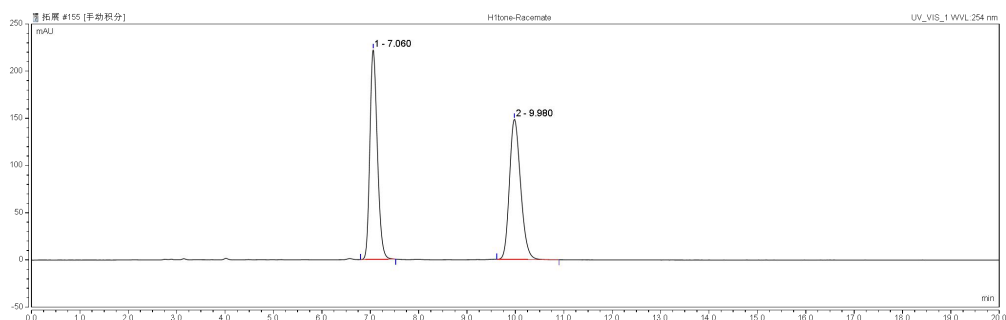

| Entry | Retention Time | Area    | Area(%) | Height |
|-------|----------------|---------|---------|--------|
| 1     | 7.060          | 39.5803 | 50.02   | 221.93 |
| 2     | 9.980          | 39.5474 | 86.05   | 148.58 |

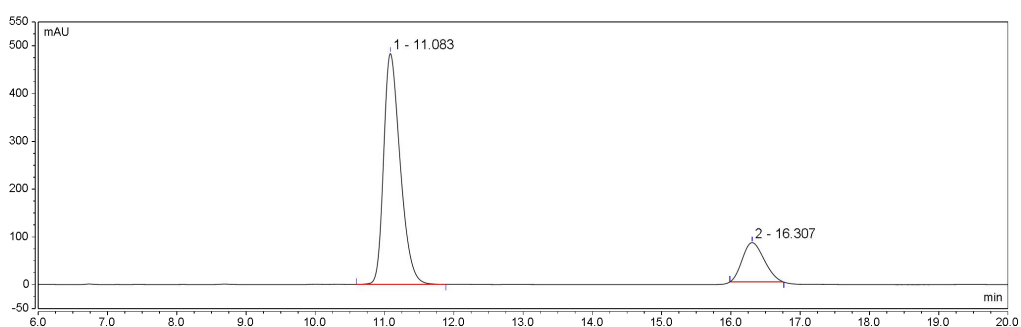

| Entry | Retention Time | Area     | Area(%) | Height |
|-------|----------------|----------|---------|--------|
| 1     | 11.083         | 133.6949 | 81.61   | 483.78 |
| 2     | 16.307         | 30.1229  | 18.39   | 82.43  |

## HPLC Chromatogram of **5**

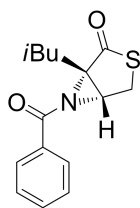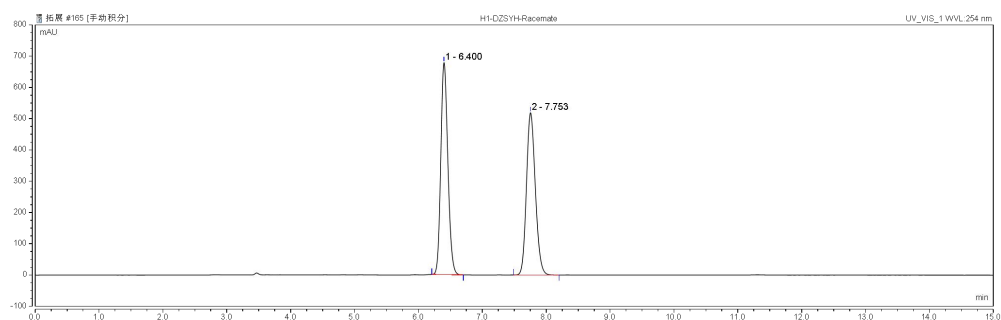

| Entry | Retention Time | Area    | Area(%) | Height |
|-------|----------------|---------|---------|--------|
| 1     | 6.400          | 86.7477 | 50.97   | 678.17 |
| 2     | 7.753          | 83.4363 | 49.03   | 519.11 |

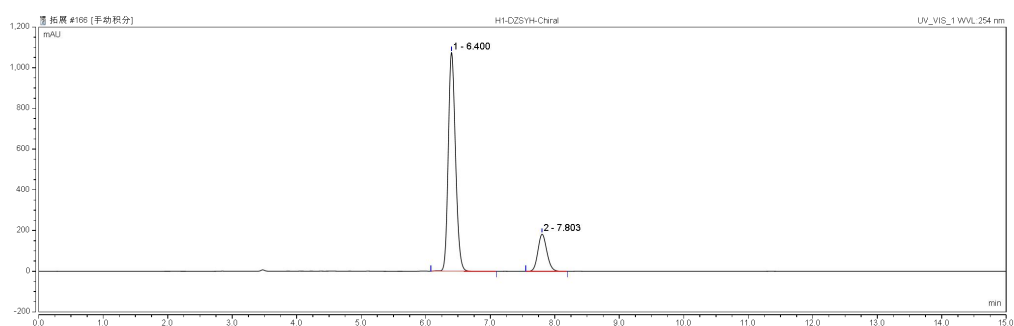

| Entry | Retention Time | Area     | Area(%) | Height  |
|-------|----------------|----------|---------|---------|
| 1     | 6.400          | 139.7047 | 83.97   | 1075.26 |
| 2     | 7.803          | 29.2788  | 16.03   | 182.75  |
